# Supplementary material for: Data-Independent Acquisition Proteomics Reveals the Effects of Red and Blue Light on the Growth and Development of Moso Bamboo (Phyllostachys edulis) Seedlings
Source: Int J Mol Sci. 2023 Mar 7;24(6):5103. doi: 10.3390/ijms24065103 (PMC10049362; doi:10.3390/ijms24065103)
Supplement: Supplementary file 1 [file ijms-24-05103-s001.zip]

Archive with 7 entries (7 files):
- ijms-2258961-supplementary.pdf
- Table S1.xlsx
- Table S2.xlsx
- Table S3.xlsx
- Table S4.xlsx
- Table S5.xlsx
- Table S6.xlsx
