# Supplementary material for: Data-Independent Acquisition Proteomics Reveals the Effects of Red and Blue Light on the Growth and Development of Moso Bamboo (Phyllostachys edulis) Seedlings
Source: Int J Mol Sci. 2023 Mar 7;24(6):5103. doi: 10.3390/ijms24065103 (PMC10049362; doi:10.3390/ijms24065103)
Supplement: Supplementary file 1 [file ijms-24-05103-s001.zip › Table S1.xlsx]

## Sheet: Table S1
Table S1. Details of the proteins identified and quantified by DIA-MS and fold change ratios of quantified proteins between different treatments
Protein number	B/D_pvalue	B/D_qvalue	B/D_Ratio	R/D_pvalue	R/D_qvalue	R/D_Ratio	[1] blue-1.raw.PG.Quantity	[2] blue-2.raw.PG.Quantity	[3] blue-3.raw.PG.Quantity	[4] dark-1.raw.PG.Quantity	[5] dark-2.raw.PG.Quantity	[6] dark-3.raw.PG.Quantity	[7] red-1.raw.PG.Quantity	[8] red-2.raw.PG.Quantity	[9] red-3.raw.PG.Quantity
PH02Gene00001	1.35306e-06	1.52285e-06	0.454669	4.53907e-07	6.57278e-07	0.306513	77896.4	62076.6	69242.8	151205	154694	154251	47344.5	44324.8	49372.5
PH02Gene00006	2.35683e-05	1.48059e-05	4.42495	0.000349376	0.000137002	1.4172	74024.1	51766.7	70282.2	7196.46	11957	25157.3	19232.2	14968.5	28596.6
PH02Gene00015	4.51604e-05	2.50119e-05	0.704912	9.16439e-07	1.12406e-06	2.6202	296101	239700	252977	380505	368068	370400	986062	973030	972847
PH02Gene00018													23639.2	31589.8	27269.5
PH02Gene00019	9.36636e-05	4.56322e-05	1.36681	0.0117417	0.0028955	1.0763	253896	286336	246254	191768	178310	205339	202179	201048	216094
PH02Gene00022	9.70024e-06	7.2815e-06	1.69672	0.00377716	0.00106269	1.49358	173044	166838	177047	111809	104367	88488.2	140174	140248	174619
PH02Gene00026	0.00141646	0.000450651	1.12689	0.00146158	0.000462736	0.912971	933642	933785	849642	793539	824931	792653	738835	755576	706872
PH02Gene00034	0.00133578	0.000428136	1.3907	0.992953	0.154384	1.03678	768923	790154	792372	572427	588630	529787	555240	617698	580089
PH02Gene00035	8.25404e-07	1.04262e-06	0.697454	0.00986814	0.00248013	1.06205	1.60984e+06	1.62294e+06	1695649	2.30956e+06	2378023	2.37873e+06	2.61349e+06	2.42514e+06	2.46618e+06
PH02Gene00043	2.59724e-06	2.54136e-06	0.66412	4.94139e-07	7.02583e-07	0.280307	3.08309e+06	3.19368e+06	3.38718e+06	4.64909e+06	5000041	4902384	1.33223e+06	1.33114e+06	1.41551e+06
PH02Gene00053	5.52923e-07	7.65995e-07	3.4739	5.15536e-05	2.78216e-05	1.77964	1020043	1.06303e+06	1.20855e+06	328779	265224	353527	573063	560419	552779
PH02Gene00055	0.0118947	0.00292876	0.111956	3.44726e-07	5.34088e-07	0.392705	18694.4	5442.15	3323.17	80399.3	88762.3	76111.1	34313.6	36542.6	25463.5
PH02Gene00057	0.000387277	0.000149334	0.669823	2.93726e-05	1.77014e-05	0.691344	510368	556814	570595	797367	829017	818704	586664	567196	536538
PH02Gene00059	0.978919	0.152504	0.924722	0.759878	0.122244	1.11278	103005	78595.8	76441.7	78898.9	121118	79031.9	95008.1	108612	106898
PH02Gene00063	0.0173419	0.00408899	0.436598	8.52931e-05	4.21827e-05	0.25117	71828.2	65652.6	37793.8	143737	132915	124804	39772.2	28796.6	32264.5
PH02Gene00065								18906.7				19194.9	33648.7	15702.6
PH02Gene00067	0.00254422	0.000753586	1.60684	0.0346345	0.00757574	2.04285	54045.3		47818.9	22383.3	35430.9	37276.9	79134.9	56012.7	59109.1
PH02Gene00069	0.0800452	0.0161323	1.70321	0.00018613	8.08935e-05	2.08009	71857.1	82029.7	86121.7	52233.2	46096.3	42585.9	91517.5	86770.9	114828
PH02Gene00070	0.0223289	0.00511457	2.5508	0.00417953	0.00116063	1.748	2330076	2.20391e+06	2.4652e+06	875135	1.26292e+06	605865	730735	2.06449e+06	2.00114e+06
PH02Gene00072	0.000624928	0.000223053	1.32393	0.638211	0.104785	0.753041	23697.3	24080		6924.45	20469.5	26737.3	3794.91	25964.7	11003.4
PH02Gene00073	5.46674e-05	2.92257e-05	0.431208	1.18516e-06	1.37386e-06	0.178882	73875.8	76740	55574.9	153131	161177	163862	38277.1	22498.2	24760.7
PH02Gene00081	0.0240267	0.00545478	0.414704	0.20696	0.038189	1.36899	45209.8	33839.1	31813	113903	87378	66046.7	146267	98873.9	120830
PH02Gene00082	0.000523292	0.000192557	0.608518	0.00335817	0.000959476	1.49803	98999.4	70865.5	71579.7	129508	137494	129773	195384	197809	201188
PH02Gene00083	0.278951	0.049958	0.950734	0.000612171	0.000219225	0.9183	85144152	81403864	82089256	86005168	86328112	89188224	81399152	79347352	79408624
PH02Gene00087	0.0012995	0.000418631	0.945795	6.35698e-05	3.31602e-05	0.868914	17290320	17182174	17755324	17737518	18490398	18993186	16488778	16019737	15473885
PH02Gene00092	0.0458815	0.00975833	0.948523	0.0148783	0.00357113	0.976942	3.37706e+06	3.38684e+06	3.65488e+06	3682131	3.73967e+06	3.56242e+06	3.54324e+06	3.58572e+06	3.60199e+06
PH02Gene00093													49551.7	52864.3	56571.7
PH02Gene00100	0.00264282	0.000779939	1.2589	0.00986087	0.00247884	0.829484	141534	134778	156290	104061	120255	119319	86523.7	104202	94314.8
PH02Gene00101	3.25196e-05	1.92533e-05	0.560081	6.06939e-05	3.19364e-05	0.527809	248157	364941	376646	570152	629362	567632	307345	312300	313070
PH02Gene00102	0.000561532	0.000204108	0.892568	1.8366e-06	1.93604e-06	0.777944	18250354	16842240	16845908	19496010	19160604	19533348	14477009	15529540	15261981
PH02Gene00104								6992.52	6399.96			9066.23	10635.5	14615.2	10206.4
PH02Gene00116	2.0622e-09	1.32307e-08	3.19043	5.14644e-05	2.77919e-05	4.91869	444584	476055	480770	140434	150882	147938	738301	722371	699886
PH02Gene00118	0.704567	0.114433	0.923335	0.795224	0.127228	1.01933	265544	295004	254288	275476	290457	316560	298519	326678	274352
PH02Gene00129	1.75504e-05	1.16822e-05	0.643726	0.0398103	0.00858615	1.09016	161751	189434	160987	278148	273116	244373	282135	277320	307920
PH02Gene00141				0.826791	0.131693	0.964021				18427	30903.3	26117.3		24003.2	24485.6
PH02Gene00150	2.28958e-10	2.89492e-09	1.87612	2.74104e-05	1.67684e-05	1.66163	9044601	8937670	8644570	4721160	4623284	4848082	8.31641e+06	7.39724e+06	7.86904e+06
PH02Gene00151	9.00368e-11	1.60949e-09	1.85446	1.90105e-06	1.98851e-06	1.95277	6626831	6864858	6.96102e+06	3.54654e+06	3.60456e+06	3.8778e+06	7.01258e+06	6840816	7.68349e+06
PH02Gene00153	5.98457e-07	8.14279e-07	1.97934	1.77967e-07	3.2579e-07	5.10604	468735	539978	522423	270643	257966	244949	1.37589e+06	1.30775e+06	1.26617e+06
PH02Gene00156	0.587223	0.0972142	1.1707	0.000126891	5.86906e-05	2.82425	77228.4	88253.1	89286.3	69618.8	79239.4	68761.1	190802	211312	212497
PH02Gene00157	7.02149e-05	3.59181e-05	1.27814	5.25965e-08	1.33144e-07	1.74044	288300	255159	274946	211519	226246	202542	365527	384154	364733
PH02Gene00158	0.000579397	0.000209456	1.14697	8.98672e-07	1.11346e-06	1.91701	674821	644963	686335	583551	582804	582710	1.16321e+06	1.1447e+06	1045078
PH02Gene00159	9.88539e-08	2.10542e-07	0.689626	0.000728654	0.000253683	0.921851	2.70243e+06	2712506	2675682	3.84337e+06	3996218	3.8923e+06	3.63232e+06	3.56042e+06	3.62233e+06
PH02Gene00160	5.18217e-07	7.31203e-07	0.409306	6.5597e-07	8.72383e-07	0.128933	201884	201229	185189	487889	472202	477224	56692.4	58343.6	70280.6
PH02Gene00161	0.0794648	0.0160215	0.556581	0.0308668	0.00682011	0.228644	99535.2	45239.9	63055.3	90227.9	145866	137311	29201.1	27486.8	28689.1
PH02Gene00162	3.85573e-07	5.77691e-07	0.305913	3.08556e-05	1.84578e-05	0.172427	123774	178214	133621	523841	454969	445151	84250.6	86776.8	74501.4
PH02Gene00168	4.73885e-07	6.80505e-07	2.37152	2.84752e-07	4.62165e-07	2.85019	496310	502949	466463	218186	198590	201275	602758	582652	576151
PH02Gene00173	0.00243749	0.000725402	1.22334	5.69192e-08	1.41047e-07	1.93207	377050	369980	371664	307073	305719	301668	591626	612506	562667
PH02Gene00178	0.00332084	0.000949964	1.82246	0.0039231	0.00109837	1.88646	44055.6	32414.7	29265.1	18565.3	21056.9	18395.6	36296.8	37701.8	35449.9
PH02Gene00180	0.000339619	0.000133783	0.770585	0.00254948	0.000755057	0.919253	771865	810188	775352	1.0081e+06	1.00269e+06	1.04845e+06	964196	936995	911025
PH02Gene00188	0.310184	0.0549365	0.725654	0.858272	0.136014	1.34662	28393.2	22870	22556.5	31978.1	33515.4	36234.9	45574.4	45776.3	45639.2
PH02Gene00194	0.000560524	0.000203884	1.18369	6.47763e-09	2.93559e-08	1.75502	638355	693688	648893	530767	581214	561540	981817	990515	964737
PH02Gene00202	0.0816421	0.0164184	3.58423	0.0107078	0.00266666	8.60292	4866.17	4901.09	9369.92	1328.11		2231.41	16953.9	16994.3	11985.1
PH02Gene00203	3.30558e-07	5.1646e-07	0.275506	7.61542e-09	3.31751e-08	0.0867232	79769.9	79447.7	52923.7	253498	254918	261589	20263.2	24984	21530
PH02Gene00208	0.00171179	0.000531245	4.10659	0.020057	0.00465381	2.39922	84305	119741	74004.7	21402.6	17089	29216.9	47585	54964.9	59897.4
PH02Gene00211	0.00170988	0.000530716	0.675949	0.000428113	0.000162261	0.717116	441116	537105	481935	857766	675705	626684	516358	527708	505016
PH02Gene00216	0.00127225	0.000411129	0.240208	0.000828976	0.000283658	0.301617		27413.5	14148.1	86865.5	84045	88624.2	23998.9	23612.9	30668.2
PH02Gene00223	1.20806e-08	4.70165e-08	7.6002	2.6528e-06	2.58331e-06	5.04328	8.21585e+06	8.02549e+06	7792419	1.05068e+06	1032102	1.07948e+06	5343562	5.31629e+06	5.28826e+06
PH02Gene00227	0.00110754	0.000364817	0.392628	0.0134267	0.00326107	0.58554	143812	141020	108991	429290	246696	327056	178019	206293	203009
PH02Gene00228	0.00208164	0.000630076	0.836764	9.07463e-05	4.43969e-05	0.816726	176817	179469	176352	198206	207125	231214	172860	172533	174490
PH02Gene00229	0.0314804	0.00694386	0.687281	0.574136	0.0953033	0.9335	96234.7	98697.1	107635	160555	138280	141403	141436	142431	127095
PH02Gene00231	0.000337494	0.00013303	1.34455	1.38199e-05	9.60356e-06	1.33879	519682	511625	548225	393211	387267	394292	523165	547213	502397
PH02Gene00232	0.000249474	0.000103452	0.723832	0.00616967	0.00163448	1.18144	38386.2	26041.1	35705.8	50095	43427.3	44815.3	59826.8	57599.7	46011.2
PH02Gene00244	4.13829e-06	3.6975e-06	0.696429	9.15608e-07	1.1237e-06	0.409405	3.02898e+06	2.65981e+06	2.70664e+06	4.11804e+06	4.03712e+06	3.89979e+06	1.62834e+06	1.66269e+06	1.64432e+06
PH02Gene00246	0.000560789	0.000203952	0.740792	2.79405e-07	4.56344e-07	0.0807892	35283.7	28280.8	37460.3	44816.5	42803.1	48754.6	5678.52	2334.87	3004.17
PH02Gene00247	0.691609	0.112568	1.03601	0.140121	0.0267566	0.881263	296441	290808	357946	299076	285629	327634	297585	257968	248458
PH02Gene00248	2.34341e-07	3.97676e-07	0.721439	0.000335156	0.000132347	0.933115	934642	916359	928464	1.25791e+06	1.30202e+06	1.29274e+06	1.18575e+06	1.21193e+06	1.19731e+06
PH02Gene00249	0.0372829	0.00809899	0.946301	0.135153	0.0258995	1.36152	61262.2	48086.4	69025.1	47392.9	79893.8	61209.1	88715.3	97906.2	70019.5
PH02Gene00255	0.000415554	0.000158306	0.815161	7.39725e-05	3.75406e-05	0.779351	2.01937e+06	2.05283e+06	2.04001e+06	2.4999e+06	2571550	2426714	1.98124e+06	2.08087e+06	1.78159e+06
PH02Gene00258	0.6543	0.107101	1.65899	0.130327	0.0250673	1.68195	16176.7	12035.7	9673.25	7812.15	7228.06	7796.31	13175.5	15621.1	9613.27
PH02Gene00260	0.000433548	0.000164052	1.1214	0.00172508	0.000535114	0.636785	794266	932477	863038	776987	752792	779646	427344	581452	461813
PH02Gene00265	0.00799492	0.00206074	1.1004	0.000184262	8.01894e-05	0.800612	666602	611216	674977	611705	573097	589827	478932	475386	466472
PH02Gene00267	6.1119e-06	5.0152e-06	0.642825	0.0369433	0.00803398	0.905504	108976	132909	127285	193315	191043	189934	176358	176718	166948
PH02Gene00268	0.00109921	0.000362627	0.573684	0.279526	0.0500521	1.1963	18870.4	24033.8	22762.4	41645.7	41782.6	31036.4	56123.7	38821.4	41988.9
PH02Gene00269	0.000577048	0.000208748	2.84056	0.00118282	0.000386325	3.37021	180680	181218	166490	60269	66100.6	59645.1	170743	206332	249834
PH02Gene00270				0.0636535	0.0130944	4.10528					26668.8	37408.9	125736	130912	137938
PH02Gene00272	0.0207541	0.00479539	0.389826				6701.1	10811.1	20591.6	38269.7	30320	29155.8
PH02Gene00273										12954.4	12316.4	16280.9
PH02Gene00274	0.000533778	0.000195887	2.06281	1.03411e-05	7.65832e-06	1.55233	171317	148579	92441.5	83699.1	49109.5	67082.6		100148	106717
PH02Gene00275							31853.8					2449.06	3201.51	6701.3	6589.27
PH02Gene00276	0.00925391	0.00234423	1.28114	0.00537063	0.00144781	1.81879	82193.9	78659.1	69159.8	60086.3	58004.2	61447.1	106511	110674	109355
PH02Gene00283	0.00195774	0.000597207	2.80333	0.00286337	0.000834848	2.39421	32371.7	26677.4	27772.1	12738.8	6100.62	12131.4	19610.4	22924.5	31615.4
PH02Gene00288	0.383794	0.066497	1.26548	0.0802929	0.0161746	1.47965	82034.2	77697.9	86048.1	79080.5	72036.3	43102.1	60470.7	85625.5	141280
PH02Gene00298	4.70425e-12	2.90514e-10	0.143155	2.38379e-12	1.99316e-10	0.027207	226978	208852	229502	1.5379e+06	1.55095e+06	1558787	43936.2	35609.2	46903.1
PH02Gene00299	0.015939	0.00379235	0.452027	0.499981	0.0841855	0.625658	10855.8	4528.41		15210	13149.7	22691.1		19108.8	2184.78
PH02Gene00300	0.0171812	0.00405405	1.45852	0.0493186	0.0104243	1.30701	137615	124998	142806	101141	86409.7	90415.7	92914.3	129023	141368
PH02Gene00303	1.22554e-09	9.0693e-09	0.129743	2.23164e-09	1.38165e-08	0.0217236	8694765	8453655	9128005	66397488	67368072	68761072	1470985	1.48235e+06	1.44628e+06
PH02Gene00309	5.10211e-06	4.36602e-06	0.6836	4.49263e-07	6.53107e-07	0.618487	545371	570394	584906	791309	865994	830510	481263	523167	534252
PH02Gene00314	0.435328	0.0743936	0.560901	0.0194316	0.00452408	2.99417	3337.62	15197.1		12195.9		20848.6	55379.6	38085.1	54946.9
PH02Gene00315	0.00044408	0.000167232	0.449734	0.195886	0.0363604	0.96172	22453.4	10883.1	28255.6	45368	46659.1	44925.3	44612.1	42956.9	44140.9
PH02Gene00320	1.27615e-07	2.55426e-07	2.38138	1.02324e-05	7.60169e-06	1.69649	411534	379562	369356	169311	148283	169708	259309	274254	293139
PH02Gene00323	0.00349248	0.000991838	0.864589	2.46483e-05	1.538e-05	0.622248	380451	369420	387438	444706	427252	443475	263621	267276	287629
PH02Gene00329	0.0571521	0.0119025	9.9469	7.15702e-06	5.69748e-06	4.21881	131750	115338	100936	13999.8	9791.29	11197	57649.9	42326.7	47631.5
PH02Gene00330	0.00017373	7.61815e-05	1.506	0.00157631	0.000494348	0.736518	203413	187414	199462	126966	129659	135334	104769	102294	81622.2
PH02Gene00335	4.71749e-05	2.59172e-05	0.741095	0.000189922	8.23205e-05	0.827785	428014	322281	353747	491242	530872	467629	459025	414039	360123
PH02Gene00337	0.0890423	0.0177797	0.742548	0.00306727	0.000886923	1.07386	73440.5	80211.9	50874.7	83133.3	99052.3	93253.9	94674.7	98298.9	102810
PH02Gene00338								73495.4			22190.4		78359.3		50001.3
PH02Gene00344	0.00403503	0.00112569	1.04947	0.00548874	0.00147505	2.46921	25745.9	61966	37325.9	42100.6	34801.6	42241.1	105851	105967	82372.1
PH02Gene00351	0.0647473	0.0133014	2.11437	0.156975	0.0296689	2.43129	9816.75	6356.19	11499.2	4254.15	5803.3	3030.23	12291.5	14578.7	4949.75
PH02Gene00352	0.0012037	0.000392157	3.77182	9.15408e-07	1.1237e-06	3.11269	136968	128049	175461	45321.9	37870.3	33589.2	121069	124337	118098
PH02Gene00355							10288.9						19255.3	11895.6	5259.3
PH02Gene00357	0.00768442	0.00198862	0.89439	0.327843	0.0577288	1.19184	140950	162119	152322	157630	179429	172104	207688	201335	197816
PH02Gene00361	0.000835528	0.000285485	0.783173	0.0064423	0.00169855	0.883586	103937	96286.5	80506.1	111219	131943	115289	99806.4	107301	109615
PH02Gene00364	0.000120001	5.59528e-05	1.02398	0.00174964	0.000541952	1.06177	3.83812e+06	3.76379e+06	3860719	3.71954e+06	3774405	3.7002e+06	3.95283e+06	4.02879e+06	3.90401e+06
PH02Gene00384	2.22553e-07	3.82785e-07	2.07337	1.64562e-05	1.10704e-05	1.67957	1.28961e+06	1182095	1.17472e+06	572539	635015	551139	974648	977191	1.002e+06
PH02Gene00385	0.000105079	5.00302e-05	1.68495	7.13718e-06	5.68908e-06	1.8415	214074	268274	247003	144846	154526	133491	270568	238005	288545
PH02Gene00388	0.922954	0.145023	0.951379	0.000543391	0.000198712	0.572328	48670.6	44138.5	47376.1	46422.5	49814.5	51112.4	31249.9	24690.3	28392
PH02Gene00389	1.94567e-06	2.02363e-06	0.409072	2.71388e-07	4.46061e-07	0.0590138	2.51427e+06	2.46121e+06	2.38141e+06	5947198	5758348	6278784	349670	333538	378115
PH02Gene00390	0.747726	0.120597	0.96212	0.0049235	0.0013415	1.01381	114652	83680.3	90598	99930.6	90898.6	109477	104818	100637	98999
PH02Gene00391	0.855305	0.135627	1.17093	0.1462	0.0278251	3.78518		10871.8	3205.85	12624.1	3084.97	2324.92	30437.8	20740.8	17083.3
PH02Gene00393	6.26846e-06	5.11029e-06	1.14179	4.2894e-08	1.14857e-07	0.474087	9154252	8912190	9021496	7.70962e+06	7915154	8.09927e+06	3.78435e+06	3.68769e+06	3.77521e+06
PH02Gene00404	5.54238e-06	4.65517e-06	0.784303	2.93072e-05	1.76702e-05	0.923048	227689	209059	230800	296960	293148	261026	282882	244752	258005
PH02Gene00405	0.197784	0.0366733	1.25183	0.0736604	0.0149606	1.48892	368965	327160	348434	284193	289112	261119	429093	393871	419426
PH02Gene00407								5604.1					96558.4	90470.4	103561
PH02Gene00416	2.58398e-05	1.59887e-05	1.2614	1.91383e-08	6.44846e-08	2.52877	195710	209844	188393	148438	159822	162602	406753	392051	391898
PH02Gene00421	0.000220242	9.31725e-05	0.801466	0.281624	0.050401	0.982418	463548	388267	495753	551167	560945	569268	567998	556342	527478
PH02Gene00425	0.54801	0.0914821	0.896348	0.215436	0.0395951	0.599444	51046.2	40431.6	52800.7	51968.9	59580.3	49413.5	34346.4	18925.3	43216.4
PH02Gene00428	9.76643e-07	1.18114e-06	6.23805	2.28393e-08	7.29057e-08	3.26047	7328788	6.94896e+06	6.84052e+06	1.12026e+06	1.12023e+06	1.1449e+06	3.67521e+06	3.65428e+06	3.7085e+06
PH02Gene00433	8.96183e-05	4.39196e-05	0.828221	0.000747657	0.000259428	0.852133	146985	162319	150100	175829	176111	202748	165583	153735	153350
PH02Gene00436	0.72856	0.117791	1.26044	0.152575	0.0289111	0.354616	372392	200178	33048.1	68738.8	232264	179480	32338.9	103532	34516.4
PH02Gene00437	0.696064	0.113201	0.769288	0.708694	0.114995	0.779781	92463.6	62043.9	95014.4	81104.3	29602.7	213647	86056.7	65299	101570
PH02Gene00441	7.49907e-05	3.79122e-05	0.78442	2.11162e-05	1.35646e-05	1.21886	442985	475885	491892	551722	643734	603023	764347	716987	710758
PH02Gene00443	0.000167798	7.41067e-05	1.79871	8.46498e-06	6.52043e-06	2.78746	100168	119748	116762	53754.7	55662.8	77759.7	175094	179180	167475
PH02Gene00450	0.000469662	0.000175034	0.873469	0.00166579	0.000518896	0.889887	564820	612017	597291	680225	695973	654931	618378	592393	596705
PH02Gene00454	0.691233	0.112528	1.15856	3.88627e-05	2.22529e-05	2.36238	90534.7	85847.2	97036.6	72016.1	82020.8	81962.3	172553	208190	176776
PH02Gene00459	0.132322	0.0254172	1.41763	0.0129258	0.00315299	2.13418	39714.1	36413.6	31386.3	23856.1	29065.6	22918.7	55888	47480.4	58489
PH02Gene00460	1.75033e-07	3.22448e-07	1.20744	8.71828e-07	1.08748e-06	0.830787	3.68919e+06	3.54062e+06	3.58866e+06	3045960	2898105	3.01579e+06	2.48766e+06	2.45979e+06	2.49628e+06
PH02Gene00465	0.984231	0.153212	1.00575	0.207718	0.0383207	0.536816	783380	940530	846410	747217	1.26909e+06	539303	533336	439257	399302
PH02Gene00466	2.7247e-06	2.6372e-06	0.823056	0.0643157	0.0132212	0.96629	1.9695e+06	1.86915e+06	1.82289e+06	2.3259e+06	2.27524e+06	2.27754e+06	2223363	2261538	2.1619e+06
PH02Gene00467							68544	65506.7	61047.2		131171		156544	169746	146893
PH02Gene00468	0.87354	0.138079	0.982195	0.104628	0.0205561	1.1619	704438	588919		687321	653958	633925	809180	801541	684267
PH02Gene00469							12912.3	13225.1	14825.6			2032.04
PH02Gene00471								5874.51	1646.31		1081.07		18718.7	16837.3	23941.1
PH02Gene00473	0.00247124	0.000733644	1.21789	3.42023e-07	5.3117e-07	2.22307	1.05985e+06	1.06143e+06	1.07017e+06	865442	900194	854834	2.02232e+06	1.84891e+06	1.95426e+06
PH02Gene00483	2.90639e-07	4.69369e-07	0.653598	3.43158e-10	3.7932e-09	0.401163	398829	398361	406886	596226	645563	600438	258061	223320	257654
PH02Gene00491	0.0607503	0.012565	1.16349	5.99871e-05	3.16287e-05	1.54734	598275	593468	567341	550555	472381	488966	755019	868889	715518
PH02Gene00502	0.000365082	0.000142236	0.887891	7.63095e-05	3.84727e-05	0.704412	182604	184905	196837	215995	208101	211506	143783	166002	137940
PH02Gene00503	5.53468e-06	4.65171e-06	2.59856	0.000548508	0.000200329	1.75625	1.01495e+06	1.0266e+06	988801	382831	394191	389144	690527	667683	689867
PH02Gene00504	0.000183575	7.99045e-05	1.15235	0.000279543	0.000113766	1.25109	587809	609870	600030	485156	544125	530751	664476	657231	630026
PH02Gene00514	0.00408044	0.00113652	0.564277	0.00142815	0.000453872	0.285598	174849	168153	180522	312737	302472	312568	87591.4	86526.1	90854
PH02Gene00517								25533.6	9005.8		41794.3		18180	9222.96	28375.3
PH02Gene00518	0.921319	0.144784	0.956149	0.327243	0.057635	2.22889	12994.3		6442.53	13066.9	5693.5	11732.1	41956.1	15233.3	10775
PH02Gene00519	0.117972	0.0229188	1.16754	0.000115078	5.39912e-05	1.2915	502949	466275	497389	419558	405218	431381	528722	563449	530157
PH02Gene00522	0.114146	0.0222389	5.45617	0.00193822	0.000591878	2.48642	5177.05	249064	35266.7	18214.7	9520.5	25325.5	76529.2	25774.1	29627.9
PH02Gene00523	0.243255	0.0441601	1.07243	0.000403131	0.000154459	0.723452	185650	174078	194364	180110	175065	161498	155369	105585	112834
PH02Gene00543	0.109867	0.0214812	1.23029	0.0794342	0.0160166	1.38934	30556.9	29148.6	33731.3	24977.4	22870	28099.8	32772.5	36820	35924
PH02Gene00552	0.547556	0.0914181	0.967655	0.00960156	0.00242117	1.24048	113619	58641.1	85103.6	98752.6	66456.6	100758	115205	118467	96254.3
PH02Gene00553	0.0183039	0.00429083	0.982626	4.16106e-06	3.71529e-06	0.77139	423035	415986	397718	435993	407707	414907	350748	322164	297964
PH02Gene00586	1.69296e-06	1.81629e-06	1.60076	1.25665e-06	1.43597e-06	1.72559	220199	226934	214272	147354	134669	131159	239796	238602	234584
PH02Gene00589	0.0389612	0.00842405	4.28645	0.238868	0.0434367	1.87688	391097	155611	144489	35256.7	33224.4	92770.6	79009.6	68675.7	154964
PH02Gene00595	0.395429	0.0683256	0.739886	0.0138088	0.00334259	1.30324	240158	81222.7	318913		291437	285493	603112	373129	151574
PH02Gene00608	0.0130504	0.00317921	0.532278	0.0576172	0.0119897	0.597107	15786.3	15552.8	11259.3	22257.2	29133.7	28639.2	14017.7	11603.7	22165.2
PH02Gene00617	0.675609	0.110221	0.42771	0.117504	0.0228331	0.600375	4893.28	18110.2	76050.3	8086.93	207815	15688.8	14175.6	68837	56028.9
PH02Gene00618	0.0238998	0.00542835	1.07995	0.526616	0.0882402	1.38204	137887	167977	189665	128111	199556	131180	211192	231988	190964
PH02Gene00621	0.0967278	0.0191607	1.05669	0.643543	0.105554	0.983614	1.01295e+06	962782	924360	872345	944941	927229	928915	906911	863716
PH02Gene00627							22971.7	16196.1
PH02Gene00632	0.00318019	0.000914676	0.87324	2.92449e-05	1.76409e-05	0.811661	122481	122660	128420	155868	137744	134174	116458	119207	111552
PH02Gene00642	0.000628336	0.000224115	0.390218	0.000455249	0.000170694	0.636015	53443.8	45805.2	36651.2	112778	122907	112583	83666.7	79447.2	58389.7
PH02Gene00660	0.00582616	0.0015544	1.66255	0.661783	0.10823	1.35448	731227	273453	119714	453523	187003	35782	128875	259326	527842
PH02Gene00663	0.000155435	6.95953e-05	1.34406	0.0136969	0.00331892	1.12567	311920	330048	319485	221160	266906	227271	309233	233491	262507
PH02Gene00666	2.24307e-05	1.42536e-05	6.7688	1.26524e-09	9.23806e-09	3.80439	2.38735e+06	2.41781e+06	2.36786e+06	369009	332739	357970	1297542	1.38279e+06	1351255
PH02Gene00668	0.000159035	7.08402e-05	1.18667	0.000166012	7.3443e-05	0.90591	1.41011e+06	1.43799e+06	1.39105e+06	1.15284e+06	1.22839e+06	1.19107e+06	1109538	1.09104e+06	1.0356e+06
PH02Gene00675	0.00375243	0.0010564	1.42553	1.09837e-08	4.36654e-08	0.434983	525511	518723	520859	379848	366057	351999	159373	158487	159710
PH02Gene00676	5.40213e-06	4.56995e-06	1.99669	3.43602e-06	3.19676e-06	2.10918	2.1677e+06	2.57558e+06	2344760	1.27998e+06	923193	1.34672e+06	2.34616e+06	2.45293e+06	2688258
PH02Gene00679	2.79315e-06	2.68939e-06	0.656156	1.79794e-07	3.2785e-07	0.48837	629969	625957	630133	927950	967382	979073	440208	477294	486271
PH02Gene00680	0.0514777	0.0108436	0.77982	0.100632	0.0198476	0.930786	117050	93348.7	97512.4	147206	116565	131079	109119	124362	134039
PH02Gene00682	0.0142829	0.00344373	1.0239	0.000633706	0.00022572	1.46655	75015.3	66888.2	74374.5	68278.3	76266.9	66683.8	85005.5	104480	120293
PH02Gene00693	0.0156178	0.00372962	1.21637	9.1136e-07	1.12117e-06	1.69138	104769	100216	105560	83631.8	85586.2	86087.2	144018	149585	138215
PH02Gene00697	0.365851	0.0637288	1.57896	0.0614262	0.0126876	2.19014	10412.3	21709.4		6854.49	16833	6827.91	2410.46	44752.3	19670.2
PH02Gene00698															17006
PH02Gene00713	3.5237e-05	2.05477e-05	0.680601	9.86165e-06	7.38768e-06	0.670533	126944	95980.2	94775.4	148343	161246	157204	102163	120906	89931.2
PH02Gene00721	1.09432e-05	7.97887e-06	0.620809	0.000611856	0.000219172	0.710029	202678	151461	175905	296563	300518	256713	212235	205422	188562
PH02Gene00734	0.323985	0.0571271	1.85967	0.122463	0.0237205	0.924013	201895	112918	198735	158477	66308.8	51365	118532	24338	112296
PH02Gene00737	0.763761	0.122788	1.07652	0.306686	0.0543766	1.42674	1478.91	1917.54	2357.98	2272.18	1936.25	1136.97	2777.7	3328.3	1520.47
PH02Gene00741	0.0167373	0.00396229	2.63441	0.00534526	0.00144232	1.64225	6609.01	3870.9	4845.27	1511.75	1513.99	2791.58	3342.82	3436.46	2774.2
PH02Gene00747	0.0183201	0.00429423	0.770978	0.0749537	0.0151983	0.891411	66979.9	79686.4	56833	86445.5	90435.3	87068.6	81849	74640.5	78797.8
PH02Gene00753	0.491375	0.0829411	1.00845	0.00625296	0.00165411	0.963046	1.73649e+06	1.68846e+06	1.74843e+06	1.69295e+06	1.7295e+06	1707597	1.5828e+06	1.67931e+06	1.67837e+06
PH02Gene00759	1.33044e-06	1.5036e-06	12.046	0.0015576	0.00048904	7.26228	258400	246071	247898	20104.9	23053.5	19299.5	162465	155361	135760
PH02Gene00760	0.00492443	0.00134161	1.70443	1.36336e-06	1.53116e-06	2.64959	146783	168798	129024	97782.6	73176.9	89892.8	224077	227057	240017
PH02Gene00763	6.80846e-08	1.60432e-07	0.581653	3.96549e-07	5.91061e-07	0.61402	10646525	9710097	9757637	17176228	17347520	17249822	10257260	10833304	10699457
PH02Gene00767	2.23292e-05	1.41995e-05	3.76223	4.4336e-05	2.4629e-05	3.48657	245467	260674	237412	65391.5	71230.4	61014.2	221958	240978	226136
PH02Gene00768	0.0207517	0.00479526	1.05611	3.79493e-08	1.04978e-07	0.672292	1.30069e+06	1.41239e+06	1.33612e+06	1267003	1.26131e+06	1.30579e+06	873199	866110	838323
PH02Gene00773	2.26373e-08	7.25289e-08	0.740064	7.26205e-12	3.19038e-10	0.0253891	1.79974e+06	1.77745e+06	1.78074e+06	2451673	2.39758e+06	2.39057e+06	69721.6	53942.5	60148
PH02Gene00781	0.000239943	0.000100049	0.608287	3.16661e-05	1.88495e-05	0.520022	88451.8	77032.2	90511.2	144666	140003	136177	76419.8	66190.5	76239.2
PH02Gene00784	0.0399589	0.0086146	3.88017	0.00110358	0.000363883	8.77562	127027	129652	104035	36315	31494.4	25154.3	267339	283129	265346
PH02Gene00787	0.00460941	0.00126577	0.839595	1.46327e-09	1.04215e-08	0.568722	1.69294e+06	1.62227e+06	1.75411e+06	1.99053e+06	2.06261e+06	1.98468e+06	1194114	1.08405e+06	1.15568e+06
PH02Gene00800	0.496243	0.0836756	0.601964	0.666274	0.108869	1.94576		1402.59	6736.83	6356.15	7217	6709		24214.1	2095.39
PH02Gene00801	0.0177745	0.00418111	0.64495	3.45865e-06	3.21237e-06	0.548172	66684.2	51126.1	63193	94156.4	94344.4	92146.1	51167.2	49901.9	52773.7
PH02Gene00813	0.470656	0.0797399	0.958943	5.32528e-05	2.86253e-05	0.716556	886107	777933	767831	816390	887986	831614	614523	592796	609860
PH02Gene00814	3.75793e-05	2.16361e-05	1.27051	0.950845	0.148837	1.07118	850889	849062	833531	676305	654910	662855	719460	719043	697507
PH02Gene00817	1.14367e-06	1.33051e-06	2.26473	0.220629	0.0404663	1.01912	811908	832265	837170	345246	385481	364917	376024	377440	363126
PH02Gene00822	0.866233	0.137083	0.947453	0.0433318	0.00926624	0.509942	30552.5	15914.2	38004.7	30604.6	19292.3	39259.4	16646.2	25336.2	3482.1
PH02Gene00825	0.000765875	0.000264998	0.918019	3.3905e-06	3.16121e-06	1.25059	1387880	1.43022e+06	1471159	1551264	1.58043e+06	1.54061e+06	1.96183e+06	1966363	1.91492e+06
PH02Gene00826	3.7085e-05	2.14372e-05	1.84635	0.429114	0.0734167	0.912492	465501	467515	439779	249789	238765	254966	206403	249939	222115
PH02Gene00831	0.0373538	0.00811168	0.871955	0.0435853	0.00931354	1.13816	122316	153970	130274	153201	151216	161846	164832	184979	180871
PH02Gene00837	0.763152	0.122703	1.08818	0.00825592	0.00211896	0.855569	76479.2	83073.8	65219.5	73352.1	59061.7	74144.1	62174.6	54599.8	59950
PH02Gene00839	1.00793e-05	7.52027e-06	2.09558	1.07805e-06	1.27478e-06	3.00798	47057.8	35795.6	49385.3	19573	21194.1	22336.7	67054.7	55259.5	67500.7
PH02Gene00840	0.437933	0.0747873	0.808544	0.62151	0.102302	0.828212	45242.7	18126.7	41074.2	46035.2	40081.4		58135.6	14389.8	34458.9
PH02Gene00845	0.0336977	0.00738956	0.866269	9.25062e-06	7.00076e-06	0.749871	317408	317073	309547	359479	380013	350272	280940	280223	256019
PH02Gene00850	2.076e-07	3.62356e-07	11.7584	4.70685e-06	4.09126e-06	8.47196	67255112	59675552	60219364	5359636	5212056	5.34465e+06	43464004	44906024	46472612
PH02Gene00852	0.0275737	0.00616182	0.954245	0.429254	0.0734311	1.06879	74290.6	84402.9	84479.1	80807.3	87711.1	86314.1	97348.6	75735.6	99277.4
PH02Gene00856	0.0904393	0.0180294	1.03537	0.0117912	0.00290603	0.786189	131233	81031.9	109171	98858	109210	102387	130318	56240.3	57518
PH02Gene00865	0.585287	0.0969494	1.04956	0.000387815	0.000149519	0.282493	72460.7	59958.5	52564.3	62825.4	52675.1	60747.9	11240.5	23546.7	15001.8
PH02Gene00874	2.87551e-07	4.66067e-07	1.9315	0.00193639	0.000591458	0.842416	1.10423e+06	1.14978e+06	1.17654e+06	580637	593492	601979	504331	479576	512315
PH02Gene00879	0.0139826	0.00337929	0.819565	0.861688	0.136497	1.00083	3676.25	4408.86	3309.15	4606.99	4389.61	4906.2	5118.97	3861.79	4933.64
PH02Gene00882	7.54702e-06	5.96217e-06	2.36502	0.000483756	0.000179641	1.03917	4453002	4678872	4.6959e+06	1.9923e+06	1.89688e+06	1.95759e+06	2.05864e+06	2.0239e+06	1.99325e+06
PH02Gene00883	0.000359674	0.000140403	0.655619	0.00181356	0.000559481	0.441156	331761	364205	340679	570153	533679	477340	237793	202366	257383
PH02Gene00886	0.000378577	0.000146721	2.45593	4.27729e-05	2.39513e-05	3.31842	67124.2	42504.7	54804.7	28854.1		15781.8	51478.1	90095.7	80606.9
PH02Gene00890				1.26172e-05	8.94031e-06	0.332387				79407.5	91612.2	67010.9	34334.4	18490.6	26293.1
PH02Gene00891	0.196651	0.0364815	1.18478	0.0602317	0.0124677	1.07345	232805	202672	267166	204164	194803	194092	235836	188605	212180
PH02Gene00894	0.00374318	0.0010546	0.767067	0.000420226	0.000159851	0.461412	45064.7	49701.8	50400.5	65064.6	67498.9	56685.8	36713	21501.5
PH02Gene00897	0.213097	0.0392097	0.8888	9.0624e-05	4.43454e-05	0.54408	281166	282148	312838	300131	340046	345592	176464	169941	189932
PH02Gene00898	8.37949e-08	1.85956e-07	1.97846	7.12535e-07	9.34237e-07	0.822659	4613178	4.326e+06	4550774	2.31339e+06	2232142	2.2729e+06	1.83801e+06	1.81421e+06	1957024
PH02Gene00907	6.57672e-11	1.32239e-09	1.75326	2.184e-09	1.36408e-08	1.88405	214877	223891	229884	130054	119783	131538	243244	239997	235289
PH02Gene00917	3.49413e-05	2.04165e-05	1.24652	3.99601e-05	2.27291e-05	0.615895	31631142	30047706	28859682	24122906	24414760	24095326	14686430	14197668	15850224
PH02Gene00923	4.56236e-06	3.98381e-06	1.63742	3.7182e-07	5.64592e-07	2.37388	450534	431134	493594	271163	279905	288828	648870	699512	645430
PH02Gene00926	0.0017006	0.000528153	1.41497	0.0527862	0.0111012	1.03682	29875	26100.5	24003.3	16157.4	16439.9	23926.2	18366.7	15402.4	24835.6
PH02Gene00928	0.00156869	0.000492198	0.798068	0.000284114	0.000115331	0.781557	403010	398985	379104	518902	527352	433693	410097	383041	363525
PH02Gene00932	3.80416e-07	5.73149e-07	5.68993	7.33239e-07	9.56977e-07	2.27345	304151	293691	325648	59339.4	60657.2	42305.9	127489	114019	127479
PH02Gene00934	7.65966e-06	6.03277e-06	3.01713	1.95411e-06	2.02764e-06	1.75182	111580	132572	135292	33956.6	47067.5	44739.3	81228	65985.3	73101.8
PH02Gene00936	0.00415276	0.00115431	0.926262	0.406429	0.0700059	0.935052	276609	296956	277316	298416	304924	315278	291414	302849	264692
PH02Gene00942	0.000717483	0.000250164	1.54812	0.00334316	0.000956137	0.65582	43025.8	31966.3	44107.4	24954.3	20886.2	31091.3	15104.3	16215.8	19133.3
PH02Gene00948	0.532856	0.0892108	1.34715	0.839796	0.13351	0.648227	136985	367346	162350	196588	204421	93874.7	122445	91419.5
PH02Gene00960	5.99e-05	3.15956e-05	0.840357	0.601473	0.0993132	1.08165	282377	276241	307407	350192	339338	341013	386217	359871	368600
PH02Gene00962	7.04119e-05	3.59975e-05	0.362087	0.00108365	0.000358221	0.459757	229054	273796	103452	555452	585887	533127	255890	262224	251732
PH02Gene00963	6.0846e-07	8.26154e-07	0.469936	2.15841e-06	2.18539e-06	0.505406	150909	107103	129044	278464	280225	264946	159610	121650	135010
PH02Gene00964	0.216098	0.0397056	1.54081	0.0569659	0.0118675	1.50107	149784	125623	126169	77914.7	51602.9	131108	118392	137080	135747
PH02Gene00970	0.470869	0.0797707	1.87484	0.715023	0.11587	1.24389	347145	183341	23218.7	22119.4	181363	91851.3	61866	198547	106950
PH02Gene00973	0.759034	0.122139	1.2191	1.16449e-05	8.37971e-06	1.63308	736124	1.11863e+06	841643	715330	758112	738344	1.19275e+06	1.3058e+06	1.11349e+06
PH02Gene00979	0.000464694	0.000173532	2.10924	0.00177389	0.000548547	1.40677	77850.2	82905.1	64400.9	38015.3	32010.3	36722	51029.1	48080.7	51059.5
PH02Gene00982	0.00123945	0.000402184	0.567578	0.0630238	0.0129824	0.253799	99748.6	42769.9	48244.2	117220	87015.5	131864	46628.3	10239.4
PH02Gene00990	0.000631316	0.000224931	3.99945	0.0035116	0.000996503	1.49346	215658	208334	233243	51589.1	73903.9	38838.5	81809.6	77835.7	85777.2
PH02Gene00998	0.00462831	0.00127015	0.397905	0.000885393	0.000300146	0.251852	239226	234203	297045	776216	565103	595009	175666	202687	109314
PH02Gene01005	6.50709e-06	5.26745e-06	1.41763	0.00088539	0.000300146	0.776167	354225	373509	397841	261766	274724	257494	229645	189592	197028
PH02Gene01006	0.166284	0.0312915	0.722247	0.00513175	0.00139093	2.84205	25456.3	38624.6	28029.8	31521.9	46887.2	49124.4	131858	101289	129309
PH02Gene01008	2.66852e-06	2.59445e-06	5.38416	0.000132587	6.09014e-05	1.22191	765170	728356	805923	143656	146907	136514	175244	187628	158976
PH02Gene01012	0.112282	0.0219087	1.05848	0.0559123	0.0116734	2.22919	52613.4		70838.2	57361.7	61138.3	56446.1	138724	132449	118816
PH02Gene01015	7.14662e-12	3.19038e-10	2.25989	7.78428e-06	6.11234e-06	4.92289	1.3499e+06	1.2674e+06	1.36731e+06	627236	572267	563680	2.9487e+06	2.95636e+06	2.7749e+06
PH02Gene01021	0.0183616	0.00430242	4.20315	0.0256002	0.00577204	0.728705	174811	34390.6	87737.8	28366	19277	23003.8	10461.2	23859.2
PH02Gene01039	0.00153844	0.000483818	0.304857	0.000614975	0.000220077	0.379725	24335.2	34523.1	26785.4	68223.9	90020.7	122686	44800	42379.7	19496.7
PH02Gene01044	0.98664	0.153522	1.00361	0.000181334	7.90213e-05	2.35871	37712	73800.9	59885	63096.5	50677.3	57008	137810	125844	139171
PH02Gene01049	3.65387e-06	3.35132e-06	7.59207	3.29508e-09	1.77935e-08	4.09564	4.9916e+06	5011697	5.01123e+06	662740	687537	627384	2.80401e+06	2622183	2.6736e+06
PH02Gene01052	1.25377e-07	2.52311e-07	2.55984	7.78195e-07	9.98912e-07	2.16704	588634	558394	557424	210526	239061	216258	486821	482402	473688
PH02Gene01054	0.00323289	0.000928392	1.61867	0.00869089	0.00221677	1.30211	704735	661879	704510	413494	434760	431264	570407	575087	520575
PH02Gene01055	0.177776	0.0332609	1.39594	0.000111122	5.23876e-05	0.361998	175352	76034	140399	120460	75692.8	84508.3	3119.37	43898	54581.3
PH02Gene01057				0.76225	0.12258	0.668538		37520.3		209915	58463.6		115897	66458.9	86776.1
PH02Gene01060	0.00610998	0.00162016	0.718911	0.000621579	0.00022195	0.675557	72476.6	89085.4	71418.4	104828	111339	107907	63450.3	86002.5	69477.6
PH02Gene01065	0.027369	0.00612179	0.543166	0.484433	0.08186	0.879464	6351.45		4871.68	11149.7	9493.71	10350.3	10342.4	7693.16	9222.29
PH02Gene01066										14003.5	8656.73	12753.2
PH02Gene01067	0.00703299	0.00183599	1.35813	0.224374	0.0410573	1.25273	39987.7	37212.2	40933.6	23274.1	42122.2	21586.3	27799	37090.7	44075.9
PH02Gene01070	0.457068	0.0776763	1.23389	0.00481756	0.00131637	1.24088	26917.4	23123	18426.1	20670.2	14563	20254.9	26011.3	23674.2	19168.5
PH02Gene01074	0.0096215	0.00242526	1.16952	0.00478666	0.00130903	1.514	142041	146047	149113	118273	132630	122926	181270	202362	182346
PH02Gene01075	0.048734	0.01031	0.799953	0.000548267	0.000200269	0.587891	21256.8	21162.2	25515.5	27204.8	29805.1	27913.1	20348	17743.9	11833.5
PH02Gene01084	0.442989	0.0755463	1.21615	0.250863	0.0454329	1.79504	9901.27	12266.2	10794.6	9752.93	8764.43	8586.3	12181.9	16335.6	20134.7
PH02Gene01092	0.478828	0.0809867	1.71443	0.0046148	0.00126685	0.424749	50092.9		22162.8	14886.6	26143	22188.7		12253.7	5647.52
PH02Gene01093	0.421354	0.0722225	1.175	0.060951	0.0126025	1.40648	149698	96447.8	106972	94846.6	110625	95054.4	146732	154658	121293
PH02Gene01099	5.04775e-05	2.73719e-05	4.23722	0.000684068	0.000240388	2.54439	322252	334587	240089	75973.3	65996	69709	177800	190021	170772
PH02Gene01100	0.00147544	0.000466669	19.2477	5.33264e-05	2.86589e-05	18.2911	197966	248565	12000.1	8856.69	4968.83	9997.19	169973	129275	136495
PH02Gene01105	0.395801	0.0683762	0.904425	1.74069e-07	3.21237e-07	1.71751	122553	87314.6	151710	118930	140695	140163	223269	230137	233233
PH02Gene01108				0.00684228	0.00179107	5.06144					7094.7	15347.3	72225.9		41362.7
PH02Gene01111	1.21491e-06	1.39946e-06	0.901499	1.45924e-06	1.61499e-06	1.1165	4496148	4401743	4338471	4.98847e+06	4.91873e+06	4.77541e+06	5489897	5.49508e+06	5408208
PH02Gene01112	0.030522	0.00675083	0.903701	0.0181468	0.00425858	0.933354	483678	367986	467786	468332	478984	512736	434385	416184	512175
PH02Gene01120							3107.46			6298.52	4295.83	6702.15			4752.83
PH02Gene01123								2835278		138277	146414	136384
PH02Gene01125	0.0832334	0.0167124	0.836903	0.327109	0.0576152	0.668056	121909	242553	146759	116469	167335	327044	202968	114971	90142.4
PH02Gene01126	0.00055097	0.000200975	0.882661	8.6853e-10	7.29759e-09	0.513915	558937	554433	567784	634163	654573	615908	330340	319520	328966
PH02Gene01128	6.1763e-07	8.35105e-07	0.55903	1.11932e-05	8.12003e-06	0.612927	333048	363983	393334	650106	641628	658724	393104	386212	416173
PH02Gene01129	0.193873	0.0360254	1.40594	0.28072	0.0502574	1.44642	9886.51	12193.4	8275.92	9769.3	7110.83	4711.04	10594.7	6734.73	13900.5
PH02Gene01132	8.85691e-06	6.76602e-06	0.899035	0.0995619	0.019662	1.14333	283101	314386	291047	330636	323430	334254	389377	384641	355954
PH02Gene01143	0.259418	0.0468318	0.984894	3.67775e-05	2.12927e-05	0.773816	276923	275948	253215	258921	284754	274774	211940	217216	204173
PH02Gene01146	0.982361	0.152957	0.822677	0.137698	0.026343	0.458723	31535.4	22353	25575.6	19732.1	19585.3	57274.6	22297.6	7344.28	14667.1
PH02Gene01153	2.25632e-05	1.43167e-05	1.3387	7.86355e-07	1.00307e-06	1.62594	1.0429e+06	1.13022e+06	1.13194e+06	818838	847787	802237	1.34204e+06	1.32227e+06	1.34989e+06
PH02Gene01154	5.43872e-08	1.3645e-07	0.747641	1.21475e-09	9.05153e-09	0.542583	495677	482728	506004	650077	681828	653553	373540	365293	338442
PH02Gene01155	0.000687979	0.000241501	2.39889	0.0113007	0.00279927	1.26338	271677	249402	264990	108123	119524	100034	139186	132839	141960
PH02Gene01158	0.0830164	0.0166761	0.616354	0.0195648	0.00455306	1.28479	36860.7	38929.5	39837.7	63502.5	64509.5	59587.7	79926.1	88426.2	72673.2
PH02Gene01160	0.00847662	0.00216852	0.511996	0.331276	0.058277	0.840626	173601	171182		330155	299610	380353	302258	226679	320195
PH02Gene01187	0.000315435	0.000125883	0.71589	5.49246e-06	4.62674e-06	0.84795	149930	148400	152013	208635	216088	204345	181933	168467	183018
PH02Gene01197	0.0471441	0.0100039	1.57206				45866.6	26735.8	52559.4	33674.9	17251	28690.5			13722.1
PH02Gene01215	0.000251289	0.000104098	0.798919	0.441007	0.0752389	1.25002	151983	112642	124330	158300	137282	191270	198357	212545	197673
PH02Gene01229	2.08307e-09	1.3257e-08	0.016771	0.00179052	0.000553163	0.043369	9540.33	9859.55	8268	547171	537443	565128	48068.4	21654.6	1824.64
PH02Gene01239	0.124403	0.0240546	0.240736	0.708812	0.115003	1.51917	21947.3	9779.17	9990.91	5923.63	109604		41387.9	134118
PH02Gene01240	0.0217774	0.00500285	3.59564	0.000403289	0.000154485	1.50628	565532	580742	535623	142813	180047	144900	181216	239706	283654
PH02Gene01254	2.78672e-06	2.68475e-06	1.3912	8.08755e-08	1.82128e-07	1.23128	2.84407e+06	3.03793e+06	2.88753e+06	2052604	2.12267e+06	2.12832e+06	2.57741e+06	2.60376e+06	2580307
PH02Gene01261	0.00735261	0.00191	0.693007				326014	161822	116094	271804	318991	280668		642650
PH02Gene01262	0.00644219	0.00169855	1.66957	0.011312	0.00280151	1.61602	134695	132389	135422	79172.9	88352.8	73558.8	133177	125253	131165
PH02Gene01263	0.801498	0.128105	1.27319	0.196193	0.0364096	1.52205	20910.9	6385.97	19278.7	8127.8	12050.6	16403.5	15058.3	23432.4	17188.8
PH02Gene01264	0.00140649	0.000447866	4.24649	0.000464114	0.000173416	3.83683	109431	88374.5	79168.3	25714.8	24875	14634.4	71052.5	93970.9	85230.5
PH02Gene01266	0.000823991	0.000282101	1.47071	0.00867255	0.00221274	1.2976	162774	165828	163458	113588	112059	108926	151488	156760	125895
PH02Gene01268	0.000590262	0.000212583	0.682855	0.0118538	0.00291953	0.824147	62437.9	71259	70935.8	118795	70700.8	110176	90856.4	93761.4	62356.2
PH02Gene01281	0.000296749	0.000119607	1.11617	8.25389e-05	4.09927e-05	0.852277	934595	885326	886779	820380	804064	800548	682504	678066	706194
PH02Gene01287	0.000236373	9.87554e-05	0.468355	0.457725	0.0777727	1.16733	23720.6	19603.6	12276.9	40559.4	40530.4	37625.9		43682.4	48704.8
PH02Gene01293	0.0961506	0.0190566	4.47095	0.0346226	0.00757379	0.617857	467327	96062.7	117184	102356	18638.3	31226.8	37967.7	30570.8	25512.4
PH02Gene01295	9.33966e-06	7.04962e-06	2.35849	2.41979e-06	2.39759e-06	2.40642	83128.1	93512.5	93628.7	28391.4	35588	50614.7	88164.9	99941.8	87655
PH02Gene01304				0.0378052	0.00819736	5.48814					8728.17	3601.04	40278.9	20937.5	40280.1
PH02Gene01305	0.00103669	0.000344588	0.730919	0.00419524	0.00116437	0.868839	237686	211215	240318	318389	376369	248190	249576	311273	258421
PH02Gene01312	0.0024376	0.000725402	1.14422	0.252847	0.0457763	1.03406	1.16333e+06	1.22464e+06	1.27166e+06	1.04789e+06	1.07475e+06	1.07573e+06	1.10682e+06	1.09234e+06	1.10815e+06
PH02Gene01319	0.253181	0.045824	1.0072	5.19148e-08	1.32444e-07	0.637193	310083	305978	316281	301033	316177	308467	197312	200777	191746
PH02Gene01324	8.89945e-06	6.79357e-06	4.49523	5.21179e-10	5.04066e-09	2.24679	2.04896e+06	2.074e+06	2.44393e+06	528146	489814	442897	1.1393e+06	1.0793e+06	1063640
PH02Gene01328	3.50347e-05	2.04389e-05	1.79182	1.03074e-05	7.63775e-06	0.465802	491171	494203	401825	277250	256132	240801	107033	170434	83149.2
PH02Gene01333	0.0328107	0.00720846	0.409234					5604.85	1841.88	9686.62	7908.31	9700.2
PH02Gene01338	6.96718e-06	5.57547e-06	0.884003	0.905596	0.142563	0.98169	664459	667107	643286	736722	762811	734456	716945	758183	717954
PH02Gene01340	0.0245374	0.00555905	1.20086	1.21736e-05	8.68779e-06	2.20894	79422.5	101025	98771.6	81247.3	83841.5	67427.8	172159	181313	160142
PH02Gene01341	4.18681e-07	6.1683e-07	180.034	9.56262e-07	1.16102e-06	308.218	2.57339e+06	2.45696e+06	2.4579e+06	14049.8	15736.4	11807.3	4316181	4.35176e+06	4.15192e+06
PH02Gene01349	0.0660088	0.0135296	0.995137	4.9059e-05	2.67482e-05	1.23147	1.4195e+06	1.42185e+06	1.45291e+06	1.5185e+06	1.4244e+06	1.37234e+06	1.75939e+06	1.80088e+06	1.75382e+06
PH02Gene01353	0.00457817	0.00125879	1.8028	6.84768e-10	6.24972e-09	0.485025	1.85547e+06	2.00136e+06	1.66442e+06	1.018e+06	954433	1.09017e+06	397223	528264	559952
PH02Gene01354	3.02326e-06	2.87676e-06	1.24541	0.000669438	0.000236208	1.1818	1.46291e+06	1.38534e+06	1.45357e+06	1.1519e+06	1.15832e+06	1.14392e+06	1.39881e+06	1.38099e+06	1.30233e+06
PH02Gene01356	0.00868972	0.00221669	1.05864	1.89637e-05	1.245e-05	0.423307	1.88243e+06	1.87502e+06	1.84137e+06	1.79582e+06	1.68667e+06	1.80621e+06	745777	744912	748058
PH02Gene01360	0.000217556	9.22468e-05	0.687638	0.000921021	0.000311007	1.27165	855768	896327	877687	1.25828e+06	1.26921e+06	1.29688e+06	1.67193e+06	1.62516e+06	1.56618e+06
PH02Gene01364	0.16925	0.0317874	9.03939	0.224351	0.0410561	0.90881	552190	76633.5	683672	54413.1	47068	43716.4	43769.3	38467.4	49720.2
PH02Gene01373	0.0395736	0.00853944	0.972924	0.0077714	0.00200952	1.20909	114271	121381	111854	117820	118273	121086	150361	138022	143475
PH02Gene01376	0.00329588	0.000943683	1.28736	3.8218e-08	1.05384e-07	1.29981	351013	308848	362187	261162	271798	260950	341197	360770	329966
PH02Gene01379	0.0080281	0.00206786	0.911132	0.820352	0.130812	0.96625	1.85388e+06	1648097	1.71499e+06	1.90276e+06	1.92628e+06	1.89677e+06	1813050	1.83498e+06	1.88454e+06
PH02Gene01385							653107	4.08658e+06	3.87028e+06				1.61674e+06	1.43032e+06	1.16048e+06
PH02Gene01386	0.115156	0.0224189	0.775295	0.203125	0.0375509	1.23916	221039	214813	207709	268578	275135	286373	407882	252844	367883
PH02Gene01393	0.994849	0.154632	0.996593	0.587815	0.0973042	1.24793	204746	183357	41925.1	96664.7		191001	180887	181695	175896
PH02Gene01404	0.0070069	0.00183047	0.693377	1.78615e-05	1.18437e-05	0.750139	358785	370076	403333	569602	525314	537953	450596	396932	377351
PH02Gene01407	0.0873976	0.0174822	0.889068	0.255614	0.0462095	1.16317	47207.5	58396.1	51988.9	56757.4	56961	63537.4	72672.4	65088.4	68417
PH02Gene01410	9.31113e-08	2.00786e-07	1.28918	1.05231e-10	1.75208e-09	1.43004	1.46026e+06	1.45116e+06	1.48566e+06	1.12005e+06	1.16057e+06	1.13013e+06	1.60787e+06	1.65334e+06	1.6163e+06
PH02Gene01411	0.519354	0.0871643	0.816541	0.0812939	0.0163534	0.810334	55804.1	39723.5	53137.8	64299.6	49705.6	68062	36962.7	42714.8	67857.8
PH02Gene01412	0.632406	0.103911	1.03674	0.00249249	0.000739276	0.617448	141294	159579	144142	110084	151555	167608	90741.6	94929.9	79365.9
PH02Gene01414	0.000559215	0.000203494	0.219603	0.852834	0.135301	1.11887	233256	278021	161128	2.99071e+06	35240.7	35959.6	11307.2	22737	3.39184e+06
PH02Gene01415	0.00192774	0.000589507	4.83179	8.64694e-06	6.63495e-06	3.21197	755068	778643	679562	157715	150296	150054	422032	487466	561794
PH02Gene01420	0.0289747	0.00643881	1.07168	0.132821	0.0254997	1.34599	110074	96950	128432	102978	127242	82800.2	160475	147834	113014
PH02Gene01423	0.833907	0.13268	1.57386	0.00739931	0.0019202	1.67956	237642	114982	240990	131353	121382	124435	263123	138218	232138
PH02Gene01424	0.546234	0.0912325	0.900001	0.000742233	0.000257856	1.35111	546797	591619	570180	636025	642585	619827	879466	872885	812635
PH02Gene01426	4.52998e-06	3.9601e-06	0.870785	1.13233e-05	8.1846e-06	1.10164	15056795	14285779	14514569	16720536	17029620	16614935	18173540	18895618	18415054
PH02Gene01432	0.000256602	0.000105802	0.844356	0.000189531	8.21925e-05	0.711535	630130	635703	631835	758521	746852	742102	523950	546533	528676
PH02Gene01450	0.411573	0.0707821	0.88088	0.0038642	0.00108422	1.20554	37321.8	38601.8	41882	53047.6	39541	41147.6	56345.7	53469.6	51409.4
PH02Gene01452	1.66263e-07	3.11384e-07	8.4335	4.03031e-06	3.61723e-06	1.74069	1.05123e+06	1.04313e+06	1.20816e+06	133969	135207	122419	214909	228820	237916
PH02Gene01453	0.00112525	0.000369945	0.394595	0.00677715	0.00177636	1.08628	58036.1	116322	73127.9	209159	209867	208166	231298	225675	224335
PH02Gene01454	9.37611e-08	2.01851e-07	5.12314	6.22398e-06	5.0814e-06	6.45238	571846	640364	580338	63934	70614.6	215344	816903	570006	870730
PH02Gene01461	0.524957	0.0879964	0.5505	0.921142	0.144773	1.07587	5407.63	14582	3247.21	11777.2	28906	1527.29	24806.8	16933.1	3673.26
PH02Gene01464	0.0204692	0.00473631	1.09303	0.00027631	0.000112645	2.57852	147625	100106	112663	116626	107781	105311	280976	277416	291792
PH02Gene01468	0.059254	0.0122879	0.977188	0.283	0.050613	1.01995	182823	121640	148139	137947	156383	168838	163833	176747	131829
PH02Gene01472	0.149242	0.028348	0.953624	0.000309244	0.000123812	1.33116	97284.2	100794	104604	100619	108124	108658	147427	148291	126796
PH02Gene01477	7.23615e-08	1.67316e-07	3.55535	7.81082e-10	6.784e-09	3.98636	455894	437978	461690	120297	131887	129090	504825	490048	525022
PH02Gene01485	0.00256344	0.000758756	1.17398	1.30547e-05	9.17873e-06	1.43792	306830	263648	280823	241098	240950	243091	350247	343179	349263
PH02Gene01489	7.23086e-06	5.74567e-06	4.63303	4.67103e-08	1.21842e-07	3.24684	252420	254865	254823	54892.7	59193.7	50408.1	172805	190640	170642
PH02Gene01491	0.749279	0.12081	0.80856	0.290639	0.0518541	1.22542	35680.3	57934.8		61741.4	39173.4	72755.4	68504.2	74078.4	70236.9
PH02Gene01495	0.00278255	0.000814312	0.500823	0.00113636	0.00037322	0.50399	131536	60020.9	131139	213562	210785	219984	104158	140601	79977.4
PH02Gene01512								5020.54	1719.59		2245.67		10867	6470.39	4096.6
PH02Gene01514	0.0648648	0.0133235	0.959058	0.864235	0.136825	1.23883	67101.5	71077.4	163696	81704.5	122187	110871	134393	125205	130339
PH02Gene01517	0.0840383	0.0168649	0.969251	0.000259009	0.000106682	0.590753	100474	64588.7	74347.5	85240.2	95113.5	66651.9	56130.1	33745.4	56044
PH02Gene01518	0.064926	0.013335	1.37246	0.253479	0.0458661	1.31576	52415.2	69490.5	67264	52692.6	42950	42189.8	62163	61657.8	57533.1
PH02Gene01524	0.00979358	0.00246408	0.559902	0.149082	0.0283196	0.72748	95836.8	32074.2	16782.3	91841.2	83327.3	83257.9	68904.7	80684.6	38410.8
PH02Gene01531	0.00469671	0.00128769	0.516802	0.00135093	0.000432404	0.545902	459209	460246	459668	887026	922003	859542	516684	544324	395769
PH02Gene01535	0.00154513	0.000485747	1.34192	1.09684e-05	7.99271e-06	0.793624	418808	355722	443156	301272	303225	302924	252822	242804	224525
PH02Gene01551	0.119156	0.0231264	1.05386	0.0245779	0.00556481	1.14713	1035083	1.06905e+06	1.00284e+06	979243	966244	1002699	1.10812e+06	1.13764e+06	1.13619e+06
PH02Gene01553	0.15516	0.0293708	0.65077	0.658803	0.107791	1.18283	27791.1	26399.2	53339.3	57604.3	52034.8	55595.2		48183.2	82113.3
PH02Gene01582	0.973467	0.151782	0.795386	0.858597	0.136057	1.0833	8157.68	22888.9	29073.1	12248.2	37004.6	26332.7	32907	29957.4	19017.8
PH02Gene01587	0.105807	0.0207609	0.988171	0.000439567	0.000165821	0.777557	123713	144111	129514	119508	140434	142152	100648	93487.3	118516
PH02Gene01588							30642.2	39198.5	29285.5			4457.93	37253.5	19468.9	21241.1
PH02Gene01592	1.64666e-05	1.10746e-05	0.751765	0.0849379	0.0170323	1.07265	42154	45653.8	43643.3	55947.5	65023	53886.2	73508.4	60619.1	53432
PH02Gene01594	0.426935	0.0730921	2.95725	0.890865	0.140466	2.66342	84157.3	70383.2	82708.4	31940.3	19341.9	28944.1	132474	8142.26	73060.3
PH02Gene01596	1.50417e-11	4.99847e-10	2.37462	0.0708917	0.0144424	1.04906	3.43848e+06	3.42037e+06	3.28892e+06	1.33717e+06	1.48278e+06	1.45348e+06	1.59415e+06	1516386	1.37256e+06
PH02Gene01603	0.0464451	0.00986848	1.76001	0.420948	0.0721624	1.18228	3.01495e+06	3167312	3.64193e+06	1.65572e+06	2.28333e+06	1.64284e+06	2.61524e+06	1.89402e+06	2.09007e+06
PH02Gene01615	0.0043633	0.00120598	0.613879	0.017889	0.00420575	0.436703	18618	11253.8	41402.2	37964.4	39968	38171.9	19103.5	20413	11186.7
PH02Gene01620	0.00430128	0.00119138	1.54925	0.000719235	0.000250741	1.56233	70775.7	66755.1	72359.8	48914.9	40208.8	46355.3	70261.4	69417.6	71984.4
PH02Gene01621	0.000317654	0.000126632	0.515928	0.000157161	7.01664e-05	0.388443	16939.2	17858.1	17263.9	35640.3	34500.1	30767.4	12057.8	14697.6	12441.6
PH02Gene01631	0.814945	0.130062	0.657486	0.0622852	0.0128466	0.785639	1.27641e+06	1.08272e+06	1.2562e+06	1.82483e+06	1.83767e+06	1.83623e+06	1.35275e+06	1.45383e+06	1.51344e+06
PH02Gene01633	0.00249546	0.000739987	1.89375	0.0402264	0.00866651	1.61098	39016.5	35630.6	43425.8	22377	16449.2	23522.6	35189.7	35221.8	30031.2
PH02Gene01637	0.00478832	0.00130935	0.506868	0.209839	0.0386596	0.891602	337205	272921	150727	647840	568957	284291	411464	477047	449862
PH02Gene01648	1.15123e-05	8.3039e-06	3.18597	9.1948e-05	4.49e-05	2.17768	58281.6	60221.3	56961.8	14333.3	25255	15485.9	36479.4	43401.6	40053
PH02Gene01649	0.000788691	0.000271702	7.19152	2.41651e-05	1.51331e-05	25.6117	118920	127722	143918	11120.6	30499.2	12688.6	440645	477405	472881
PH02Gene01650	0.000350352	0.000137343	0.953731	0.00405523	0.00113047	1.70178	41311.6	72394.5	36962.8	47312.8	66624.6	44041.1	67021.4	91232	110592
PH02Gene01653	0.0763604	0.0154521	1.01761	0.000380689	0.000147364	0.924233	166514	178329	181410	174318	176750	166078	147872	156729	173363
PH02Gene01657	0.0211833	0.00488149	1.62435	0.0169354	0.00400407	1.28267	74501	64728.1	69038.3	45277.7	38740	44198.3	62125.3	49050.7	53282.3
PH02Gene01660	0.00272915	0.000800946	0.848786	0.000108453	5.1363e-05	0.710615	690788	684482	681201	806011	788907	827919	574051	568440	579214
PH02Gene01665	0.0227159	0.00519427	2.17848	0.931211	0.146072	0.52851	273712	333258	300986	90556.1	118362	207865	34205.2	84370.6	101698
PH02Gene01669	4.40522e-05	2.44976e-05	0.90036	2.85996e-11	7.80318e-10	0.0268288	6.27651e+06	6.10835e+06	6.29501e+06	6.98779e+06	6.93339e+06	6825946	206559	181659	168402
PH02Gene01672	0.0482951	0.010228	0.860552	0.000310267	0.000124145	0.580313	104895	106633	105977	121767	129243	117945	72754.9	76629.4	64724.8
PH02Gene01687	0.162987	0.030729	0.702817	0.174366	0.0326653	0.644605	446213	369422	339800	573684	526187	544133	417212	356674	285847
PH02Gene01690	0.000237479	9.91377e-05	1.60269	3.48171e-06	3.22652e-06	1.33466	971218	730157	846118	512000	598035	479480	634497	705925	781034
PH02Gene01693	0.0200017	0.00464222	0.966512	0.00269096	0.000791889	0.775792	79505.5	90891.5	103037	76778.2	98687.3	107442	66583.1	86143	66751.4
PH02Gene01700	0.378964	0.0657744	2.08933	0.0251622	0.005683	3.57559	12992.8	1880.86	21178.6	6360.51	6473.04	4421.86	19777.3	25523.8	16397.2
PH02Gene01701	0.149422	0.0283695	0.829594	0.0140625	0.00339702	0.790358	607967	734501	649042	794282	768803	837500	653372	663368	580583
PH02Gene01704	2.81948e-12	2.14944e-10	0.278216	2.20697e-09	1.37511e-08	0.20655	581232	534293	544822	1.97447e+06	1.95683e+06	2.03654e+06	423154	410895	398608
PH02Gene01714	0.0464046	0.0098607	0.796623	0.458434	0.0778829	1.1003	30292.6	14188.7	12721.3	23347.1	24261.6	24197.6	18304.1	25897.8	34806.8
PH02Gene01720	0.0167777	0.00397076	0.619633	0.0315328	0.00695364	2.32182	44136.2	46474.6	43982.5	65788.2	59575.7	91850.5	172762	166568	165004
PH02Gene01730	0.00177787	0.000549648	0.814989	0.0214888	0.00494179	0.822979	217407	254433	233974	273408	294431	298202	252310	253761	206664
PH02Gene01732	0.51965	0.0872027	1.54288	0.195735	0.036335	0.921107	201697	126700	461176	232948	126507	152299	230213	98515.2	142652
PH02Gene01740	0.000156276	6.98752e-05	1.67823	0.00133095	0.000426801	1.26882	444775	516571	573148	297056	292213	325087	415316	394545	350290
PH02Gene01745							67524.9			385109			303704
PH02Gene01749	4.17956e-06	3.72795e-06	1.97333	0.000733634	0.000255244	1.07176	1.88388e+06	2.05327e+06	2.12845e+06	1.0475e+06	1.05336e+06	972930	1091399	1083358	1.11961e+06
PH02Gene01752	0.239372	0.0435192	0.919606	0.060352	0.0124906	0.990326	333546	297346	318637	333436	355024	344080	342468	337166	342917
PH02Gene01759	0.00191392	0.000586046	0.391244	0.516085	0.0866662	1.195	38993.5	23314.6	29176.1	73492.7	100223	60113.3	109521	95178.3	74725.9
PH02Gene01765	0.428022	0.0732541	1.51783	0.395655	0.06836	13.7283	3393.81	3645.95	7779.06	2089.94	4418.85		8985.86	121834	3212.41
PH02Gene01767	0.0014846	0.00046922	1.3906	3.4707e-06	3.21978e-06	0.627703	3.55303e+06	2.81405e+06	3107592	2.41032e+06	2.23216e+06	2.1709e+06	1.40121e+06	1.43564e+06	1.43994e+06
PH02Gene01768	2.88075e-06	2.75939e-06	0.833948	0.155787	0.0294766	0.953362	371946	350689	354865	422509	423801	445736	420952	426791	384045
PH02Gene01770	0.934791	0.146572	1.23828	0.141009	0.0268984	1.08273	196865	111249	167167	98808.1	152979	132036	144446	152836	118295
PH02Gene01772	6.98827e-08	1.62746e-07	1.63408	4.3487e-07	6.36467e-07	1.34928	298613	304868	322146	201133	190389	174930	265846	259755	238702
PH02Gene01776	0.00138785	0.000442582	0.957801	6.55698e-07	8.72383e-07	0.766915	1.75252e+06	1658203	1733313	1.73615e+06	1828497	1.80602e+06	1.3344e+06	1.4216e+06	1.36285e+06
PH02Gene01777	2.64529e-08	8.16262e-08	0.383609	5.20732e-06	4.43701e-06	0.630847	186385	201433	236007	525461	557249	543494	368796	340734	316355
PH02Gene01778	4.2605e-06	3.78454e-06	0.720293	5.61269e-08	1.39617e-07	0.463181	659750	712095	788193	1.03272e+06	1.02142e+06	944690	465459	424639	498904
PH02Gene01790	0.0356129	0.00777578	2.30592	0.525983	0.0881513	1.6726	79112.2	77082.7	74247.6	30558.6	44369.6	25007	69222.7	44950.8	52978.6
PH02Gene01792	0.18286	0.0341405	0.731306	0.695502	0.113124	1.12709	6146.2	7984.78	7629.21	9763.69	9037.22	10954.3	14030.4	10985.7	8520.77
PH02Gene01796	0.00168571	0.000524155	1.49953	0.0345004	0.00755087	1.10639	185990	174288	209100	117191	134341	128173	134485	141094	144523
PH02Gene01799	0.000489274	0.000181447	1.37751	0.0102859	0.00257421	2.22583	41184.1		50652.4	27992.4	33901.6	38109	71352	130078	21159.8
PH02Gene01801	0.0114283	0.00282709	0.496232	0.00555447	0.0014887	0.449608	104854	81298.3	103054	198839	198663	185301	72294.3	75700.9	114038
PH02Gene01805	0.424888	0.0727754	0.883555	0.0322177	0.0070902	2.01579	22054.8	24111.1	21731	26936.2	27037.1	22871.9	45582.8	55218.5	54102.5
PH02Gene01807	0.0899293	0.0179333	0.374635	0.215622	0.0396236	0.476991		13190.8	19277	60454.7	28407.1	41135.8	5790.55	11663.1	44554
PH02Gene01808	0.020345	0.00471053	1.18596	0.0101797	0.00255207	1.19209	50811.4	64777.2	75512.9	53650.4	51488.8	55997.9	61411.6	68694.2	61983.5
PH02Gene01813	0.000463938	0.000173375	1.10661	0.000127685	5.89841e-05	1.29133	226076	237604	249937	211824	216495	216547	277460	281588	273686
PH02Gene01836	0.136412	0.0261214	0.752889	0.0263644	0.00592376	0.506403	4.88412e+06	6230135	4.62212e+06	6.97601e+06	7.14854e+06	6.77678e+06	3.55377e+06	3.53192e+06	3.4988e+06
PH02Gene01837	0.397806	0.0686722	1.95808	0.109999	0.0215053	0.309747	917141	907896	877160	696644	388860	294517	214129	89867.1	123461
PH02Gene01838	0.000916694	0.000309707	0.569197	6.40484e-05	3.33897e-05	0.638598	65879.5	56123.1	49655.4	109835	99456.9	92287.7	47737.8	79766.9	65083.4
PH02Gene01839	1.09587e-05	7.98787e-06	4.20361	4.16425e-07	6.14328e-07	3.36437	13892562	13718946	13595563	3.33254e+06	3.31409e+06	3.15614e+06	10882086	10933020	11165066
PH02Gene01840	0.165335	0.0311286	0.560648	0.116107	0.0225836	0.671931	107792	195680	175865	326912	298149	229908	175691	203715	195075
PH02Gene01841	0.000101959	4.88097e-05	2.06417	2.11352e-05	1.35735e-05	2.58498	66661.7	57983.3	74527	18665.3	19319.7	58505	72716	77785.7	98923
PH02Gene01850	1.54461e-05	1.04807e-05	1.14207	0.468484	0.0794239	0.861	288948	271157	262753	230744	231518	258237	198428	205395	216526
PH02Gene01852	0.730666	0.118095	1.39601	0.146125	0.0278129	1.66561	44776	315634	269943	142388	164992	144157	348732	193200	210156
PH02Gene01859	0.451105	0.0767637	0.748597	0.892418	0.140677	1.06195	4910.17	4394.74	3635.26	6963.78	7104.41	3217.73	3704.44	6932.47	7719.78
PH02Gene01862							45350.8	35178.3	50599.9				49592.9	38988.5	48601.7
PH02Gene01875	0.547097	0.0913603	0.854908	0.147832	0.0281053	1.10396	12732.9	8284.25	18394.1	15440.3	15293		13539.4	21397.1	15955.8
PH02Gene01876	0.0223894	0.00512798	1.29147	0.000137153	6.26544e-05	2.01975	67922.3	55526	68900.9	49780.1	47571.4	51586.7	102156	106924	91738.9
PH02Gene01884	0.283364	0.0506726	0.905756	0.0465799	0.00989065	0.783329	41179.4	57650.5	61536.8	75704.3	38675.7	62672.7	42237.4	38528.2	57924.9
PH02Gene01897	5.22035e-08	1.32919e-07	5.69682	1.09306e-11	3.88112e-10	4.57769	674968	670538	697559	122804	120783	115045	543509	552075	546126
PH02Gene01902	0.575592	0.0955049	0.591659	0.497572	0.0838562	1.32907	25314.4	42646.5	43082.5	57292.4	65093.8	65295.3	89407.5	82366.2	77668.4
PH02Gene01908	0.00589356	0.00157016	2.89741	6.44564e-05	3.35484e-05	3.03743	58165.5	71965.7	67752.7	22453.7	19594.8	26248.3	78524.5	53736.5	75186
PH02Gene01925	0.101644	0.0200199	1.1176	8.0596e-05	4.02058e-05	1.15951	979331	912047	1.00424e+06	838322	920584	832015	1.01912e+06	1.02489e+06	960185
PH02Gene01926	0.449569	0.0765325	0.556249	0.0224307	0.00513654	0.491228	17979.8	31181	20375.3	59955.1	16760.9	48293.1	25946.9	10682	24779
PH02Gene01930	0.00346662	0.000985901	1.31673	0.0589706	0.012234	1.45748	38175	47428.1	51076.6	36054.5	37240.1	30507.4	48273	50161.3	52855.4
PH02Gene01936	0.00535798	0.0014447	1.35114	0.0927843	0.0184388	1.21431	462708	447781	462483	324112	382132	309913	418208	414501	401223
PH02Gene01937	0.0158355	0.00377188	0.875165	0.00069308	0.000243012	0.336205	2970.18	4651.47	4026.47	3884.69	5099.47	4325.47	1392.61	1926.91	1155.25
PH02Gene01948							70249.5	92360.3	43821.3	14150.5			61239.3	49642.1	61743.1
PH02Gene01970	9.25689e-05	4.51434e-05	0.528316	0.000191086	8.26868e-05	1.30722	109799	193652	180944	305329	319908	291631	406258	396302	395991
PH02Gene01974	0.391273	0.0676797	1.06842	0.0699897	0.0142834	1.02082	254422	228399	248991	224012	231319	229618	227431	229668	242107
PH02Gene01980	0.0248139	0.00561334	0.930823	0.00267961	0.000788907	0.62077	144001	155006	170998	160273	169375	175287	106449	100354	106645
PH02Gene01985	0.000251475	0.000104158	7.05669	1.36755e-06	1.53384e-06	3.23117	975150	959786	1.02756e+06	165076	139274	115464	467612	492124	396752
PH02Gene01994	0.00311886	0.000899632	0.423851	0.00763245	0.00197618	0.781022	70188.8	56439.9	92326.1	200016	186048	130521	95598.8	141793	166072
PH02Gene01996	1.86497e-05	1.22815e-05	0.37472	8.81719e-07	1.09706e-06	0.163954	53724	91290.1	60635.1	196269	186915	165624	35311.7	19399.5	35267.8
PH02Gene01997										105965		34185.8		4357.47
PH02Gene01999	0.000303832	0.000122041	2.81162	2.47537e-05	1.54342e-05	2.62407	119023	116170	110367	42461.3	43807	36636.3	116682	109053	96774.6
PH02Gene02005	5.51964e-05	2.94441e-05	1.94296	0.0123938	0.00303894	1.2221	357646	354008	346649	179899	191717	173072	214405	218933	232326
PH02Gene02014	0.464962	0.078868	1.47093	0.189808	0.0353183	0.953548	104271	152968	52719.1	32538.6	161193	16991.3	70858.3	100724	29352.7
PH02Gene02038	0.000126331	5.8473e-05	7.90046	1.23917e-08	4.78678e-08	8.25395	672003	669701	674993	80058	81238.9	93966.5	668566	721986	716378
PH02Gene02047	0.0594124	0.0123168	0.794481	0.846233	0.134402	0.905403	49604.3	91941.7	95167.2	99802.8	117008	81136.4	112311	99683.8	57767.7
PH02Gene02060	0.400726	0.0691165	1.81581	0.0129629	0.00316145	3.23415		16766.2	8221.86	5458.31	8303.07		19482.4	27097.7	20179.4
PH02Gene02062	0.00446552	0.00123095	0.87097	0.046176	0.00981614	1.14722	140325	148792	170526	175611	178040	174085	210817	190039	204575
PH02Gene02069	0.013034	0.0031767	0.973659	3.87922e-07	5.80875e-07	1.35921	959116	1.05851e+06	938065	994722	1.0358e+06	1.00513e+06	1.39746e+06	1345296	1.38335e+06
PH02Gene02076							37969.8	100985	33607.8	67628.8			55355.8	57265.5	33431.4
PH02Gene02077	1.83853e-10	2.57593e-09	11.3714	5.90785e-08	1.45424e-07	6.86505	1243667	1.17923e+06	1.24659e+06	116890	113435	92369.5	729473	763301	722541
PH02Gene02078	0.00372082	0.00104876	6.16372	0.241098	0.0437991	1.17294		219281	204215	31453.3	40712.1	30896.4	70718.1	43298	6869.42
PH02Gene02079	0.212313	0.0390877	1.16355	0.010626	0.00264884	0.971715	625711	643567	708516	580012	564892	554893	611415	504922	535383
PH02Gene02081	5.08851e-07	7.19946e-07	0.428317	3.17451e-06	2.98452e-06	0.70688	359983	385792	371601	919668	838935	850154	601813	579572	662694
PH02Gene02085	0.157185	0.0297021	1.16831	0.991538	0.154182	1.00885	721167	737941	680070	635187	599841	595978	604942	626113	616152
PH02Gene02096	0.303854	0.0539371	2.04232	0.0983456	0.0194455	1.99564		33778.8	176019	49129.8	49387.1	55570.8	94895.8	124288	88319.8
PH02Gene02099	0.552267	0.0921156	0.93618	0.0289363	0.00643248	2.20751	21570.7	46765.8	21016.6	37761.7	35419.6	22263	68940.2	77662	64092.5
PH02Gene02105				0.0112858	0.00279609	2.58461		2999.28		2591.81	9850.53	10500.4	15153.7	22344.2	21800.3
PH02Gene02106	0.287237	0.0513002	1.17655	0.862154	0.136554	0.956825	70417.3	27048.2	27488.2	45034.9	33697	27471.6	30521.5	42065.4	29031.2
PH02Gene02119	0.0181483	0.00425858	1.78852				109008	133446	107070	68148.4	59536.1	67741.3	97441
PH02Gene02121	6.94047e-05	3.55809e-05	0.706331	4.73291e-06	4.10703e-06	0.30873	62088.8	60236.2	36925.4	61152.9	86326.8	77981.9	14479.7	22439.6	32687.5
PH02Gene02131	2.97891e-05	1.78859e-05	0.728379	0.000421393	0.000160201	0.815992	291397	272444	283172	398190	395980	368703	331852	315977	301066
PH02Gene02135	2.16136e-05	1.38352e-05	0.665297	9.16999e-06	6.95395e-06	0.857281	568602	555581	591456	838950	893563	846242	768742	735352	706623
PH02Gene02137							13395	17523.3	12416				20509.8	18455.6	7193.83
PH02Gene02140	1.79285e-06	1.90141e-06	4.37233	1.93536e-10	2.64642e-09	3.32819	5.37038e+06	5454740	4716435	1.11928e+06	1.25744e+06	1.17781e+06	3.98941e+06	3.93316e+06	3907575
PH02Gene02149	0.00743996	0.00192979	0.723932	0.000377476	0.000146382	0.302001	163531	136932	135640	202758	200390	199261	70488.7	57182.1	54257.4
PH02Gene02157	0.00198402	0.000603903	3.22199	6.02171e-05	3.17177e-05	1.83034	58448.7	69757.2	55592.7	18137.3	19199.9	19707.9	29912.1	41715.3	32784.4
PH02Gene02158	0.101531	0.019999	1.19971	0.0762466	0.0154327	1.21259	267951	65861	397068		178383	227759	239963	191090	307674
PH02Gene02160	0.836715	0.133102	0.883665	0.020208	0.00468339	0.582317	132270	129384	102687	117693	145482	149132	76581.3		83481
PH02Gene02162	0.950158	0.148756	0.983354	0.206847	0.0381709	0.661963	292119	353912	520033	252127	476005	457671	346577	180190	258190
PH02Gene02167	0.00317393	0.00091338	2.11419	0.000121609	5.65744e-05	3.38978	62437	48397.2	69284.9	30162.5	28273.9	26759.1	70287.4	113501	105006
PH02Gene02168	0.00205421	0.00062246	1.631	0.167766	0.0315496	1.10846	119163	105131	98788.1	74668.8	59876.2	63543.5	77811.2	76926.6	64836.1
PH02Gene02170	0.0666221	0.0136448	1.16377	0.13224	0.025408	1.31742	47518.5	41848.9	45484.1	46293.6	33476.6	36104.7	56396.3	48837.5	47422.4
PH02Gene02171							951960	619723	698966				142751	128626	144674
PH02Gene02185	3.07293e-08	9.05118e-08	5.27914	8.88531e-08	1.94681e-07	5.87268	746275	744044	750879	122686	140828	161024	850023	839627	803527
PH02Gene02186	0.00526333	0.00142154	0.77263	0.288707	0.0515342	0.848041	301939	292760	313010	398785	393466	382581	327059	345188	324059
PH02Gene02187	0.00463473	0.00127164	0.357378	0.0111799	0.00277226	0.663705	3044	8583.52	4120.67	18068.1	11796.1	14201.7	11108.4	12665.2	5473.17
PH02Gene02188	0.0124864	0.00305732	1.27675	0.147069	0.0279721	1.19196	99532.3	90083.3	97289.5	83280.5	66071.7	75362.8	89728.6	90447.7	87674.7
PH02Gene02196	0.0491994	0.0104017	0.690138	0.105212	0.0206629	2.47064	16948	17053.7	7375.75	35107.8	13737.5	11110	58064.4	45253.7	44809.7
PH02Gene02200	9.39717e-05	4.57417e-05	3.04434	2.51453e-07	4.21808e-07	3.37861	487079	346134	343470	171057	100645	114813	434053	438536	433292
PH02Gene02202	0.000880256	0.000298797	221.631	2.40595e-05	1.50749e-05	383.094	1.71298e+06	1.89619e+06	1.78517e+06	10449.3	6590.24	7299.71	3.07801e+06	3.13237e+06	3.11385e+06
PH02Gene02204	0.00095501	0.000320812	1.95978	0.975781	0.152084	0.930093	141239	195942	143170	76408.2	82715.3	85981	63898.7	68754.4	95317
PH02Gene02205	0.156366	0.0295711	3.52444	0.0258835	0.0058248	4.8635	22413.5	22252.3	5587.32	4993.99	1810.29	7454.17	21544.2	30320.2	17481.6
PH02Gene02207	0.000104218	4.97023e-05	1.21664	0.652158	0.106777	1.00146	396404	375013	419644	287088	354910	336982	315921	314806	349686
PH02Gene02209	2.38897e-06	2.3734e-06	1.19709	0.011932	0.00293712	1.03505	1.00967e+06	1.03887e+06	1.01299e+06	835261	874841	847371	874572	919790	852754
PH02Gene02211	0.0472513	0.0100242	1.58621	9.24207e-06	6.99634e-06	2.42801	46988.1	47580.8	47505.5	31665.9	27642.4	30260.2	79979.5	66555.5	70938
PH02Gene02213	1.19986e-06	1.38594e-06	7.45004	3.50528e-07	5.41459e-07	5.3469	4.07389e+06	3618968	3741907	557836	487898	489125	2.61498e+06	2.75621e+06	2.83556e+06
PH02Gene02215	0.873838	0.138118	0.841958	0.00286454	0.000835009	0.667313	66060.9	45007.1	15672.7	68130.8	48409.4	33990.8	31774.8	53424.8	15251.7
PH02Gene02216	2.01736e-09	1.30399e-08	10.9269	6.22447e-08	1.50901e-07	5.77866	799976	752139	779665	80937.1	74087	58375	408674	424982	399505
PH02Gene02217				0.040282	0.00867778	0.718136				123312	134425	104318	73575.4	82663	103767
PH02Gene02226	0.0028022	0.000819046	1.54249	9.22271e-05	4.50193e-05	2.33783	45745.3	48086.3	42913.5	28480.4	29109.2	31062.4	62761.4	67239.8	77251.7
PH02Gene02228	0.0387827	0.00839106	1.03502	0.104618	0.0205556	0.974348	2.36561e+06	2.11337e+06	2.19543e+06	2204154	2.15939e+06	2.08502e+06	2.04524e+06	2.13871e+06	2.09919e+06
PH02Gene02230	0.0896638	0.01789	1.34673	0.3	0.0533077	1.44144	12490.4	15934.5	11962.1	9117.93	9536.87	11334	15993.1	18981.3	8252.7
PH02Gene02239	0.0369174	0.00803038	0.82932	4.00208e-06	3.5995e-06	0.673643	126405	125372	134997	159902	149439	157032	102289	97649.2	114231
PH02Gene02245	0.00541994	0.00145852	0.812048	2.18014e-05	1.39391e-05	0.746621	73032.3	90396.8	82179.8	104044	100535	97877.2	72123	80079.1	73618.1
PH02Gene02250	4.24898e-05	2.38591e-05	1.86331	0.000301863	0.000121401	1.57925	514450	501286	595486	321534	247789	295388	422017	479709	463868
PH02Gene02251	0.000222659	9.40567e-05	1.24552	0.000337131	0.000132924	1.36709	669276	715880	762793	561343	587227	575974	714681	815141	827788
PH02Gene02263	2.77413e-06	2.67508e-06	1.55419	4.99419e-07	7.08923e-07	2.12158	2.32669e+06	2.31597e+06	2418833	1.55536e+06	1.44027e+06	1.54789e+06	3350508	3.09577e+06	3.19316e+06
PH02Gene02265	0.00136002	0.000434669	1.26411	1.70918e-07	3.17577e-07	2.35148	183632	197889	181463	145470	151780	148109	351213	339110	356930
PH02Gene02266	0.023162	0.00528532	0.309883	1.20552e-05	8.61724e-06	0.175025	13444.7	4014.78	4122.7	21820.7	22024.4	25801.1	7425.52	2304.8	2459.52
PH02Gene02270	0.821342	0.130922	0.988183	0.0919368	0.0182928	1.03608	293184	228611	243175	279258	255021	239838	277652	265733	258666
PH02Gene02271	5.78462e-05	3.06871e-05	1.06033	0.0284235	0.00633207	0.851467	101514	105023	95877.9	88671.1	95250.7	101287	80179.7	77135.9	85529.9
PH02Gene02276	2.8711e-09	1.6108e-08	7.73265	4.48632e-08	1.18835e-07	8.6454	7.93599e+06	7.52932e+06	7.55576e+06	948099	1.01047e+06	1.01855e+06	8897506	8407437	8433497
PH02Gene02277	0.0956688	0.0189669	1.02483	0.0629986	0.0129788	0.640552	22820.9	16602.1	13555.6	15295	13002.1	23397.7	11198.3	16616.8	5298.09
PH02Gene02279	1.16431e-05	8.37971e-06	0.690572	0.0830522	0.0166799	0.905443	220647	252498	224185	334448	318731	356608	314326	322994	276983
PH02Gene02288	0.0156351	0.00373306	1.37537	0.000555095	0.000202222	1.60909	135069	168243	169109	98956.3	133398	111134	174287	177407	201009
PH02Gene02298	0.00594641	0.0015831	1.83789	0.00973947	0.00245166	1.63495	351231	403452	387930	205954	186019	229725	322000	381760	312686
PH02Gene02303	0.0636914	0.0131012	1.66306	0.770163	0.123661	1.12685	1.44846e+06	3.12267e+06	1692655	1.18437e+06	1.36564e+06	1.2164e+06	1.49778e+06	1.31245e+06	1.43395e+06
PH02Gene02327	0.245417	0.0445214	0.977247	0.000267865	0.00010965	0.741687	66774.9	37553.7	41200.5	52099.8	51483.1	45334.4	43189.3	33069.8	34191
PH02Gene02347							94209.5	48142.1	34475.8				56750.1	58743.6	35252.9
PH02Gene02355	2.39359e-05	1.50077e-05	5.53949	7.18072e-12	3.19038e-10	3.8808	10346503	9449094	9510221	1848770	1696454	1.74512e+06	6917957	6917950	6694855
PH02Gene02362	0.0627216	0.0129253	1.73811	0.157264	0.0297149	1.36933	10422.2	8480.96	8573.72	4159.17	5782.03	5867.26	6405.29	7480.98	7760.73
PH02Gene02364	0.0333755	0.00732385	1.64354	0.0418439	0.00897694	1.2239	170403	196491	211113	102599	142603	106482	151290	174186	104949
PH02Gene02366	9.2897e-06	7.01804e-06	0.599021	0.00194377	0.000593364	0.94545	3.22144e+06	2835068	2.97325e+06	5.0107e+06	5169706	4.89378e+06	4.82328e+06	4778969	4.64964e+06
PH02Gene02368							19042			63195.7	44670.8	34649.2	14911.7
PH02Gene02371	0.577421	0.0957689	0.932726	1.54043e-06	1.68631e-06	0.622202	795923	858959	841686	941057	894560	841020	562422	512358	590627
PH02Gene02379	0.274011	0.0491455	0.856033	0.00413024	0.00114916	0.377745	545632	407930	502358	587149	538266	575360	225104	240413	176942
PH02Gene02381	0.000492507	0.000182447	0.263123	0.00761578	0.00197224	0.104747	25330	18967.3	25353.5	85914.6	94467.6	84326	10994.7		7490.29
PH02Gene02382	0.000506574	0.000187256	0.340607	0.000197768	8.50528e-05	0.547979	4623.3	10722.4	969.288	16783.2	14630.2	16486.4	9950.08	9528.96	6769.04
PH02Gene02385	2.98422e-06	2.84392e-06	0.765955	3.49395e-06	3.23557e-06	0.814463	2.38738e+06	2.38145e+06	2390906	3088387	3142580	3.1165e+06	2.52727e+06	2.52632e+06	2.55957e+06
PH02Gene02386	7.13892e-08	1.65621e-07	1.39337	0.000290676	0.000117577	1.23043	249566	265522	264885	194668	178545	186560	236271	247207	205284
PH02Gene02392	0.966411	0.150868	0.992829	0.466287	0.0790824	0.792476	203393	198732	200404	253536	205348	147998	170589	195445	114905
PH02Gene02395	0.0466017	0.00989446	1.21182	0.0991867	0.0195969	1.39712	114209	54823.5	73226	67354.1	71243.5	61315.6	105034	69655	104615
PH02Gene02396	0.000616073	0.000220348	0.773292	5.91528e-06	4.8895e-06	0.721453	874111	795479	905465	1.11406e+06	1.11998e+06	1095957	763185	813865	825381
PH02Gene02403	5.35633e-07	7.4925e-07	0.647131	0.356317	0.0622648	0.983458	1.04875e+06	961378	956873	1.53834e+06	1.51056e+06	1.53596e+06	1.50322e+06	1.48194e+06	1.52385e+06
PH02Gene02406	0.416047	0.0714546	1.13508	0.425647	0.0728765	0.960787	54744.8	51266.8	46365.4	42021.6	45801.4	46420.8	44086.6	37652.2	47240.9
PH02Gene02409	0.121626	0.0235704	0.971376	6.32008e-07	8.49671e-07	0.517325	299248	256886	280576	289829	285997	285539	155739	164910	124956
PH02Gene02428	0.00250968	0.00074412	1.38879	0.00700166	0.00182947	3.16203	15998.7	29486.2	12739.8	13394	16956.7	11574.1	63532.6	45085.2	23949.8
PH02Gene02432	0.751079	0.121032	0.323918	0.60571	0.0999363	0.140439	165663	187000	150126	1.5096e+06	32591.7	10026.6	57302.6	88992.5	71695.9
PH02Gene02436									41363.2				113216	132508	72776.9
PH02Gene02441	0.00858051	0.00219271	2.13799	0.00915621	0.00232243	4.39413	48156.5	24857.4	36600.6	23682.6	13011.1	14576.1	71116.3	80535.4	73634.8
PH02Gene02444	8.42e-08	1.86376e-07	0.394484	0.00239964	0.000714846	1.10571	55476.6	36825.9	44642.4	113172	120809	113169	130760	120667	132421
PH02Gene02452	0.159181	0.0300596	0.890963	0.00380245	0.00106851	0.841939	367827	339665	320823	401564	393337	359261	331928	344519	295287
PH02Gene02453	0.030398	0.00672627	0.809934	0.237719	0.043249	1.14656	93298.1	160189	145109	144538	170083	177513	186868	213566	163827
PH02Gene02454	0.0234979	0.00534971	3.42776	0.00110384	0.000363912	2.33417	47097.1	182646	47329.4	33849.9	24889.7	22092.4	35708.5	86649	66317.7
PH02Gene02455	6.27673e-07	8.45597e-07	1.58716	0.000163489	7.24504e-05	1.19752	4510437	4568685	4.60752e+06	3.13801e+06	2.80961e+06	2.67573e+06	3462748	3.38791e+06	3.47596e+06
PH02Gene02456	0.790447	0.126589	0.996357	0.0832233	0.0167117	1.35154	102773	21083.9	105739	68651.3	77973.5	83810.6	44215.9	142596	124632
PH02Gene02463	0.00154032	0.000484353	0.786067	7.52709e-10	6.63613e-09	1.87002	126411	134592	122969	154411	170501	163560	312276	303528	297647
PH02Gene02467	0.284869	0.0508911	0.983301	0.00546208	0.00146895	0.79899	702982	697168	531646	621264	667486	675853	530594	503371	535733
PH02Gene02473	0.0111526	0.00276602	0.987552	0.00513739	0.00139203	1.21361	282498	301603	306103	307397	291279	302749	377165	329120	387697
PH02Gene02475	4.37888e-05	2.43825e-05	1.28228	1.57074e-06	1.71498e-06	0.674493	490897	468419	504426	376513	380720	384278	267670	253204	249068
PH02Gene02477	0.000949591	0.000319281	0.792901	0.00826582	0.00212074	1.04648	440034	449301	448881	545135	565796	576816	583737	597099	585357
PH02Gene02486	0.324904	0.0572697	0.444751	0.204935	0.0378503	0.488937	29684.8	38836.4	25557.1	102626	38760.7	70143.9	44032.4	29715.3	29677.3
PH02Gene02493	0.000438847	0.000165646	9.44386	1.73171e-06	1.85097e-06	15.3841	163176	187180	196968	14334	26668.7	16952.8	267326	290497	333774
PH02Gene02507	0.591465	0.0978477	1.12578	0.000171218	7.52838e-05	2.27538	27459.6	20636.9	21714.2	15688.7	22913.5	23408.9	47278.8	46051.7	47768.5
PH02Gene02508	5.98173e-08	1.46547e-07	2.27436	9.12212e-08	1.98194e-07	1.60896	4399118	4371333	4.23689e+06	1.90378e+06	1.88913e+06	1.92622e+06	3.13506e+06	2.97858e+06	3.08822e+06
PH02Gene02514				0.907263	0.1428	0.958435		14807.9		9435.87	26082.3	19483.9	18550.1	10651.6	23514.1
PH02Gene02515	0.0182244	0.00427413	0.99921	0.000582672	0.000210493	0.742524	287628	289034	264269	280744	275173	285679	234198	218668	172039
PH02Gene02518	4.44106e-06	3.90343e-06	0.616203	4.39489e-08	1.17318e-07	0.531542	511150	503777	507185	776521	855213	838414	399685	455936	457367
PH02Gene02521							27432.1	15331.7	52508.3				179673	194765	184169
PH02Gene02523	0.00443795	0.00122374	1.34872	0.00187976	0.000576811	1.30358	126357	104780	134880	94075.2	97033.4	80271.7	121706	120823	111238
PH02Gene02525	0.335623	0.0589747	0.971589	8.25188e-10	7.0824e-09	0.258979	1.71933e+06	1.90654e+06	1.85391e+06	1.86158e+06	1.91711e+06	1.86133e+06	478782	484172	497693
PH02Gene02529	0.917579	0.144239	2.1038				42077.1	241244	20501.1	43196.4	38981.9	62237.6
PH02Gene02530	1.79281e-06	1.90141e-06	30.7315	7.23793e-07	9.46078e-07	27.6974	1.47077e+06	1.47477e+06	1.50993e+06	51802.3	48829.4	44348.8	1.34719e+06	1.35422e+06	1.31417e+06
PH02Gene02531	2.94127e-06	2.81009e-06	0.459646	0.000601437	0.000215948	0.759212	257164	238161	254875	547440	560869	523820	418884	400823	419424
PH02Gene02532	8.54294e-08	1.88454e-07	0.64956	8.72712e-08	1.92189e-07	0.323173	33725572	32971656	32485734	51891448	49917532	50883520	16483239	16357023	16505830
PH02Gene02533	1.18247e-07	2.42781e-07	0.377709	8.21716e-08	1.84035e-07	0.217251	12494714	11357100	10598138	29270068	31361806	30575686	6.6146e+06	6.64532e+06	6554991
PH02Gene02546	4.47058e-10	4.54421e-09	2.24364	1.36627e-10	2.08543e-09	1.54579	1.85344e+06	1770177	1.85124e+06	821063	827203	791896	1.27438e+06	1.26214e+06	1.23545e+06
PH02Gene02548	5.70419e-05	3.03287e-05	0.580506	0.022476	0.00514555	0.839328	91316.5	132462	128400	199638	197027	210010	179491	162817	166891
PH02Gene02551	0.401093	0.0691692	1.09157	0.365036	0.0636125	1.16861	99463.2	93127.1	116158	77514.8	105520	99814.4	112131	113706	104702
PH02Gene02555	0.00894719	0.00227498	0.906309	0.00204555	0.000619907	1.42218	959696	939630	945371	1.00849e+06	1.08297e+06	1.04731e+06	1.51777e+06	1520472	1.42565e+06
PH02Gene02556	0.0320849	0.00706336	1.4868	0.0403377	0.00868687	0.69564	331969	336768	317290	234554	214457	214178	153513	151817	156010
PH02Gene02558	0.183438	0.0342435	1.06069	0.000549306	0.000200564	0.929613	79986.4	101501	141520	96715.3	95369.8	112442	96085.3	101121	85886.9
PH02Gene02559							28493.3		8122.25		13340.2		24494.3	43181.9	38992.4
PH02Gene02562	1.09745e-07	2.28849e-07	0.626691	5.64063e-05	3.00213e-05	0.890682	6254926	6214109	6.11217e+06	9485809	10153333	10010552	8665813	8617115	9125524
PH02Gene02568	0.00176605	0.000546514	2.49686	0.119408	0.0231718	1.07032	334927	200592	341150	197672	56658.6	96778.8	125506	123045	127246
PH02Gene02570	0.0942521	0.0187018	0.996847	0.00329597	0.000943683	1.20216	189224	205291	198813	195349	193290	206566	238739	245911	230882
PH02Gene02577	3.38291e-05	1.98877e-05	2.19852	4.84527e-08	1.25214e-07	3.41527	49830.5	51431.4	59572	24092.4	23936.4	25126.7	79180.7	88386.9	82278
PH02Gene02578	0.0432765	0.00925516	1.51918	0.0195257	0.00454477	1.13555	13520.5	22992.1	13553.9	13571.2	9802.82	9582.1	15957.2	7741.04	13725.3
PH02Gene02580							49345.5	27595.6	5852.31				63495.8	68169.5	53675
PH02Gene02585	0.007811	0.00201835	1.28667	0.00232469	0.000695396	0.786832	2.26442e+06	2.40968e+06	2211845	1.70668e+06	1.76258e+06	1.88251e+06	1.34618e+06	1.43092e+06	1.43385e+06
PH02Gene02590	0.118252	0.022968	1.25927	0.0611706	0.0126419	1.47703	32390.6	39957.9	54669.1	39644.4	39908.1	21313.5	47439.7	51178.5	50363.7
PH02Gene02594	0.294111	0.0523905	0.438972	0.80576	0.128739	2.00837	59045.6	25323.4	54741.6		15222.1	196045	238879	179370	218205
PH02Gene02597	0.00116225	0.00038066	0.569466	0.415531	0.0713708	1.07349	62903.5		44893.8	105664	93975.1	84303.6	111671	107739	85400.1
PH02Gene02599	4.26452e-05	2.39153e-05	1.6165	0.00265005	0.000781625	2.31662	101733	103029	131033	61032	72163.6	74535.3	163042	148068	170124
PH02Gene02612	0.903553	0.142293	1.06064	0.379908	0.0659162	1.51628		6130.29	12521.8	4708.82	12258.5	9411.14	5780.57	15585.7	18630.9
PH02Gene02629	0.246929	0.0447799	1.70562	0.0025787	0.00076281	1.66069	64457.7	42090.1	25981.7	20125.6	18468.5	39107.6	56008.9	43663.2	29366.5
PH02Gene02640	0.00495191	0.00134825	0.505663	9.38345e-06	7.07714e-06	0.349921	38134.2	48455.3	95094.7	127670	131238	100391	41015.6	45921.7	38788.7
PH02Gene02646	0.0704056	0.0143592	1.05188	0.199164	0.0369081	0.9659	338828	363435	354600	338454	328302	337984	333671	320308	316500
PH02Gene02651	7.17322e-09	3.19209e-08	1.51609	8.78057e-07	1.09314e-06	1.42729	2.42654e+06	2.42783e+06	2.50636e+06	1.60977e+06	1.63397e+06	1.61134e+06	2.31199e+06	2337334	2280300
PH02Gene02653	0.000101349	4.85755e-05	1.11968	0.00271528	0.000797689	0.899607	5.05639e+06	5.17148e+06	5277175	4.59633e+06	4812613	4438775	4261096	4175455	4.02096e+06
PH02Gene02657	2.34072e-09	1.42756e-08	0.640519	6.1649e-12	3.19038e-10	0.461276	7498484	7.54287e+06	7.36934e+06	11813382	11552105	11622863	5375572	5241940	5.52178e+06
PH02Gene02661	0.0916625	0.0182452	1.11485	0.037366	0.0081123	1.46841	36542.9	25093.1	22877.4	25864.1	24473.8	25469.1	45146.6	34864.7	31304.6
PH02Gene02666	0.00190833	0.000584612	0.949893	0.00292393	0.000850026	0.944809	2.08017e+06	2.09143e+06	2.08016e+06	2.19969e+06	2.21131e+06	2170537	2.09039e+06	2.07726e+06	2.05065e+06
PH02Gene02670	0.811903	0.129613	1.06293	2.14561e-06	2.17588e-06	0.802913	1.75266e+06	1.83338e+06	1.73529e+06	1.66592e+06	1.63549e+06	1.7049e+06	1.34754e+06	1.30975e+06	1362335
PH02Gene02673	0.0578873	0.0120411	0.501914				1.07881e+06	274131	260126	1.29254e+06	722928	1.19836e+06		725572
PH02Gene02679	0.00764186	0.0019782	0.955175	0.000151132	6.79974e-05	1.54285	400126	330308	362588	342666	399432	402219	650962	602653	511898
PH02Gene02683	0.056904	0.0118565	2.06102	0.793343	0.126982	1.49104	83825.2	109509	104578	44639.8	49083.5	50822.7	66793.2	75536.3	73194.7
PH02Gene02688	5.71505e-06	4.77236e-06	2.38502	0.0111281	0.00276045	1.02742	8506905	8191992	7.97229e+06	3538642	3.35604e+06	3.44955e+06	3.56404e+06	3.45459e+06	3.60924e+06
PH02Gene02717								82605	43719.3				60970.9	34413.3	83616
PH02Gene02724	1.4937e-05	1.0202e-05	5.18751	0.000207844	8.86361e-05	4.9284	212811	189611	186006	30420.1	40751	42260.4	188989	189645	180403
PH02Gene02746	1.70032e-07	3.16266e-07	2.62592	0.000131959	6.06666e-05	1.25803	1099474	1.20515e+06	1.1401e+06	430065	454881	426869	526553	597884	525864
PH02Gene02747	0.0125652	0.00307371	0.345081	0.00859489	0.00219617	0.476324	62824.9	74554.1	120504	378928	242416	125969	75572.3	150173	130218
PH02Gene02762											547.872
PH02Gene02766	0.000647484	0.000229851	0.300181	0.0300754	0.00666399	0.121597	12058.8	5557.48	8481.59	18747.7	35137.9	33054.9		5143.29	1904.5
PH02Gene02767	3.54292e-09	1.88181e-08	2.37032	7.79448e-06	6.11665e-06	2.02929	616023	589351	568636	280794	222338	245296	517588	490425	510760
PH02Gene02778								10344.4		2706.97		4688.61		9953.51
PH02Gene02780	4.81353e-05	2.63221e-05	0.836848	0.000115421	5.41291e-05	0.875031	548280	616461	623481	704674	714931	717250	652758	604136	612919
PH02Gene02792	0.000125517	5.81379e-05	0.693722	3.0038e-05	1.80144e-05	0.394489	167596	177118	209020	267279	276703	254227	90649	105762	118473
PH02Gene02794	0.0417988	0.008968	0.696814	0.816789	0.1303	0.946922	80728.3	71441.7	91080.6	127603	115790	105697	110729	107477	112354
PH02Gene02803	0.17539	0.0328404	0.933168	0.0152941	0.00365874	0.481889	230630	257583	273570	265414	175284	375643	122210	117775	153400
PH02Gene02808	4.65722e-05	2.56295e-05	7.94863	1.09884e-05	8.00505e-06	3.34681	1.35421e+06	1.37922e+06	1.29918e+06	171471	169913	165950	576034	550575	571344
PH02Gene02809	0.00736741	0.00191308	1.29728	0.0197329	0.00458889	1.3005	101279	89228.6	207654	68729.9	125067	113122	120926	132947	145276
PH02Gene02813	0.0584243	0.0121384	5.93863	0.0511485	0.0107848	5.74325	21301.3	26921.7		2960.17		5160.05	19005.1	32928.2	18021.4
PH02Gene02815	0.0041902	0.00116314	3.14533	0.00613668	0.00162641	4.36067	45761.1		46063.4	8431.91	24017.8	11341.1	56662.6	68913.9	65381
PH02Gene02819	0.00159276	0.000498588	0.826191	0.000635603	0.000226302	1.06045	374655	331687	339744	407188	427620	431348	461280	445263	436154
PH02Gene02820	0.0540745	0.0113427	1.21322	4.41991e-05	2.45687e-05	1.36341	237201	155496	254017	149006	191323	192726	214001	244901	267873
PH02Gene02823	0.091988	0.0183002	0.528473	0.0146227	0.00351694	0.56546	237469	181754	145493	319978	402610	345993	278019	151352	174869
PH02Gene02835							21242		10560.1				54959.2	46930.5	45047.1
PH02Gene02836	0.000331902	0.000131182	0.74955	9.057e-07	1.12003e-06	0.569695	294180	221314	275331	344629	332513	377925	192244	213327	195496
PH02Gene02839	0.00334924	0.000957562	0.618747	0.0152607	0.00365209	0.596884	32551.7	46999.9	40995.6	66856.2	48781.7	79186.7	47122	27151.7	42014
PH02Gene02849				0.743623	0.119967	1.10422				7520.27	11824.6	12030.9	16332.6	11215.1	7097.9
PH02Gene02850	0.740913	0.119572	0.976181	0.384606	0.0666288	1.07638	228594	199555	196807	193512	220161	226531	227275	253571	208255
PH02Gene02858	0.000289967	0.000117382	2.25337	0.00173765	0.00053856	2.13623	88788.8	71636.6	53682.2	29193.6	27629	38193.8	66267	96933.4	39776.7
PH02Gene02859	0.0301454	0.00667836	3.23021	0.127026	0.0245124	1.17435	649989	601691	1.30443e+06	300183	219779	271351	461018	271364	196897
PH02Gene02861	0.0880061	0.0175931	0.927608	0.725372	0.117349	1.13685	81539.4	51561.9	89679.1	78910.4	89349.1	71906.9	86949	85740.7	100344
PH02Gene02869	4.89274e-05	2.66821e-05	1.22012	6.50411e-05	3.37917e-05	1.21633	930867	1.02395e+06	970624	855357	791216	751099	993052	977792	945510
PH02Gene02871	0.747525	0.120571	0.836758	0.837881	0.133255	0.898695	95341.2	72347.4		187267	57080.8	56256.2	100181	84104.1	85866.6
PH02Gene02877	0.418023	0.0717417	0.87185	0.0450102	0.00959823	0.681621	99308.8	87230	104778	123523	100633	109981	72555.8	84902.3	70296.5
PH02Gene02879	8.93456e-08	1.95265e-07	0.863639	0.0105046	0.00262109	1.83771	12804.4	12531.5	14924	15902.7	15138.7	15575.2	29966.8	28699	27002.1
PH02Gene02880	0.00285549	0.000832931	0.643569	0.0166941	0.00395314	0.835203	185807	178699	197438	290785	285259	297124	238967	252405	237901
PH02Gene02883	0.000530884	0.000195074	1.29497	0.790887	0.126644	0.620914	81459.7	65128.8	91148	76097	36635.2	70852.6	54147.1	24270	35573.1
PH02Gene02885	0.000542498	0.000198497	1.25788	1.05449e-10	1.75208e-09	1.79638	642560	630751	648665	505446	519465	503038	902534	928354	913884
PH02Gene02887	3.77167e-06	3.43265e-06	0.795178	0.000407282	0.000155773	0.892562	6.39812e+06	6342748	6085760	7.90862e+06	8.14628e+06	7621087	7129572	7056410	6946301
PH02Gene02888	3.35182e-07	5.22358e-07	2.91532	4.52221e-05	2.50374e-05	2.50101	1.94065e+06	1686813	1.7182e+06	638898	628216	566530	1.55205e+06	1.53124e+06	1.50267e+06
PH02Gene02895	2.51043e-05	1.56044e-05	1.09493	0.0218828	0.00502393	1.1015	337788	348503	349384	315298	324220	306363	373469	340464	327959
PH02Gene02911							22622.5	13902.4	21127.3			78885.1
PH02Gene02915				0.957664	0.149687	1.07417			68818.2	20328.2	27296.9	8606.46	22056.1	24489.2	13856.8
PH02Gene02916	0.0364373	0.00793727	0.831756	0.000232269	9.73692e-05	0.804341	72648.5	77564.3	85681	87066.6	96001.3	100541	79726.6	77619.6	70772.5
PH02Gene02924	0.0197364	0.00458928	1.44071	0.0283745	0.00632279	1.48059	146637	143526	170533	105215	118424	96130.5	178548	145914	148985
PH02Gene02929	0.0336548	0.00738099	2.3137	0.000708891	0.000247801	3.19437	57699.1	46036.4	55355.1	24848.2	17459.6	26452.4	91898.6	76801.1	50945.6
PH02Gene02934	0.00061585	0.000220329	1.75771	3.47749e-09	1.85466e-08	2.60975	973270	940897	898514	522451	559631	518116	1.38809e+06	1.37205e+06	1415982
PH02Gene02936	2.11849e-06	2.15508e-06	5.66929	3.60369e-07	5.50753e-07	11.2105	571048	688269	568160	87628.1	103535	131184	1.16089e+06	1.13211e+06	1.32067e+06
PH02Gene02951	0.000166232	7.35154e-05	0.664944	0.740842	0.119568	1.11526	62934.9	104697	35342.1	120755	102600	81895	117294	100303	122836
PH02Gene02962	1.23522e-08	4.77971e-08	1.45428	0.000100637	4.83149e-05	0.967291	934727	952776	990178	680217	630954	667601	611629	655281	647138
PH02Gene02980	2.71144e-07	4.45943e-07	2.48162	0.00859624	0.0021963	1.42678	548647	539849	580472	218010	220659	233862	319516	334537	305500
PH02Gene02988	0.650496	0.106532	1.15575	0.0700622	0.0142959	0.692019	105286	92631.5	100790	78809.7	93095.6	86547.7	49826.4	62705.1	66322.7
PH02Gene02990	2.13504e-06	2.16765e-06	2.93769	9.407e-05	4.57793e-05	3.08573	73658.4	53324.1	62250	20428.1	15992.9	27994.4	57256.5	75905.9	65606.2
PH02Gene02999	0.0306817	0.00678094	1.83078	0.300245	0.0533477	3.26356	78963.9	24518	27434.8	22617.4	28280.3	20610.9	153358	23495.3	56519.3
PH02Gene03000	3.36636e-06	3.14469e-06	0.841016	4.09274e-09	2.12593e-08	0.638474	2.6437e+06	2717474	2.66505e+06	3.20448e+06	3.24295e+06	3.09606e+06	2.04561e+06	2.04237e+06	2.0053e+06
PH02Gene03002	0.17625	0.0329896	0.594062	0.00830136	0.0021286	0.519051	54755.9	59094.9	55555.9	89889.7	84735.7	110541	39952.4	51606.7	56456.7
PH02Gene03004	0.00600354	0.00159553	0.734785	5.0137e-07	7.11303e-07	0.151129	2.23383e+06	1.89703e+06	1.53956e+06	2.70165e+06	2.65431e+06	2.36117e+06	387515	413529	365237
PH02Gene03005	1.8367e-06	1.93604e-06	0.544155	9.17385e-08	1.98486e-07	0.134256	35756960	36034612	35782912	64843416	68000728	64846760	8708653	9192655	8639860
PH02Gene03006	0.00103006	0.000342605	0.765978	0.381931	0.0662228	1.11743	160237	147410	158080	203050	202716	202250	239295	222442	217676
PH02Gene03034	0.0492974	0.0104207	0.998496	0.000458769	0.000171691	0.865553	899575	1.0029e+06	953174	965298	965421	929236	884145	777916	813382
PH02Gene03042	0.00988137	0.00248232	2.16137	2.58498e-08	8.02374e-08	2.44158	67445.5	31398.1	70785.3	27272.2	31743.8	19466.2	61564	68177.5	61879.4
PH02Gene03047	0.00293818	0.000853785	0.728259	2.72053e-06	2.63513e-06	0.55954	581725	608301	541527	777134	791594	808931	460685	433549	436160
PH02Gene03052							320950	514462	598361				241276	227189	153228
PH02Gene03057	2.05204e-05	1.3264e-05	1.54855	2.34643e-05	1.47656e-05	1.25606	4804629	4.83297e+06	4936045	3.22369e+06	3089810	3.09768e+06	3.9576e+06	3.87254e+06	3990865
PH02Gene03068	0.0148011	0.00355491	2.37614	0.00561119	0.00150312	4.0736	30188.9	29270.2	26066.7	14059.2	6981.09	14953.4	53353	43272.4	49998.4
PH02Gene03075	0.768871	0.1235	1.11441	0.0921076	0.0183211	2.00637	34441	25391	34840.2	40437.7	16510.7	28004	58435.6	53260.5	58749.6
PH02Gene03083	0.00473602	0.00129696	1.44432	1.08852e-08	4.34068e-08	1.68024	491213	500467	508923	330243	373030	335698	586533	595493	563693
PH02Gene03088	2.2193e-05	1.41372e-05	2.04637	1.34755e-10	2.08543e-09	1.75088	24729916	24464208	24323464	11878512	11940151	12107211	20915480	21092142	20894410
PH02Gene03098	0.000327788	0.000129833	1.79482	1.06317e-06	1.26005e-06	4.83238	15982.1	22072.8	17171.5	12837.3	6554.61	11378	54681.1	52285.2	41725.2
PH02Gene03106	0.236276	0.0430045	1.15432	0.538446	0.0900439	1.24857	158544	210940	151086	135972	172383	142619	201872	182391	178808
PH02Gene03114	0.000400278	0.000153616	0.872769	0.312514	0.0553152	1.17261	33393	38052.4	30959	38242.4	35732.5	43357.9	51987.2	38911.7	46687
PH02Gene03118	0.000187127	8.12585e-05	0.924214	0.0018284	0.000562985	0.914231	398020	347611	400128	396228	420185	423300	440544	337542	355297
PH02Gene03120	0.336861	0.0591722	1.2871	0.8443	0.134128	1.16841	22285.2		24167.7	19987.7	16165	17984	19223.7	21649	22381.3
PH02Gene03122	0.149382	0.0283641	1.06992	5.46235e-05	2.92107e-05	1.52466	361905	356154	386882	339712	337234	355786	529257	553152	492159
PH02Gene03123	0.00263893	0.000779055	0.591011	0.176688	0.0330668	0.889582	211924	301336	414520	460008	546524	563289	442875	543747	409861
PH02Gene03128	0.0137518	0.00333064	0.64314	0.0175376	0.00413063	0.563297	7807.72	12170	12482.4	17078.6	13409	19983.8		15592.2	3361.32
PH02Gene03130	0.181869	0.0339733	1.72909	0.0561801	0.0117208	0.699111	524652	197442	371092	228033	182823	221375	140070	122475	179455
PH02Gene03137	0.000440839	0.000166228	0.066373	0.000626793	0.000223627	0.338864	4628.08		6930.55	104576	74126.2	82518.2	30706.9	29004.3	28806.7
PH02Gene03144							16423.1		10467.4			13397.5		11153.5
PH02Gene03145	0.424647	0.0727436	1.28335	6.66092e-05	3.44466e-05	2.41084	7072.64	15604.7	17115.4	6857.44	17223.5	6925.98	30771.6	25146.1	18835.2
PH02Gene03148	0.0481756	0.0102052	0.664276	0.00727755	0.00189259	0.493198	77464.6	80613	81802.5	118250	132404	110462	76083.9	44905	57112.3
PH02Gene03149	0.0104022	0.0025998	2.79668	0.956787	0.149577	0.972088	209358	188413	196613	72523.6	61975.8	78032.5	87236.5	52496.6	66866.5
PH02Gene03151	0.00175909	0.000544576	0.823304	0.00577397	0.00154242	1.08461	217699	206945	238588	276110	264343	265121	302800	286807	284127
PH02Gene03156	0.376306	0.0653787	0.891427	0.000560002	0.000203723	0.374533	102193	78017.5	83756.8	101476	91383	103259	35184.5	31809	43912.4
PH02Gene03157	0.00330197	0.000945193	0.454572	0.0315502	0.00695629	0.591493	7087.19	8112.65	2426.63	14364.2	10816	13595.8	8318.76	7492.5	7124.44
PH02Gene03167	0.000330097	0.000130608	0.914681	0.0270244	0.00605525	1.04665	199635	186781	199222	196439	203301	240524	211582	224642	233907
PH02Gene03171	0.143458	0.0273293	1.28184	2.13397e-05	1.36878e-05	2.90935	21992.2	29472.1	35205.1	17212.3	20141.6	30259.5	61790.8	68150.5	66770
PH02Gene03172	0.00838249	0.00214769	0.891851	0.553446	0.0922944	0.975911	5.3643e+06	5.19201e+06	5242864	6115431	5798709	5.8009e+06	5396373	5994464	5897459
PH02Gene03175	2.02011e-05	1.31165e-05	0.632258	0.13549	0.0259583	1.1356	53479.1	57188.7	53312.7	79014.1	93586.5	86756.1	99949.2	104802	89775.2
PH02Gene03176	0.0370587	0.00805705	0.596839	0.0194459	0.00452702	0.562347	277510	285886	267460	670037	353474	368582	259373	266238	257228
PH02Gene03185	0.0371124	0.0080667	1.46383	0.25981	0.0468895	1.19553	151612	135414	137603	94460	113982	81639.8	109999	140117	96685
PH02Gene03186	0.0152162	0.00364233	0.781506	0.720357	0.116605	1.006	25137.7	31757	21659.2	31433.9	32116.7	36965.4	39264.7	32088.7	29765.3
PH02Gene03189	0.00567902	0.00151909	0.560611	0.0130327	0.00317667	0.474479	34292.1	41018.7	24204.5	70850.5	45040.8	61621	29097.4	24857.6	30270.7
PH02Gene03197	2.81034e-06	2.70393e-06	0.575349	4.4556e-07	6.48087e-07	0.431736	1646055	1.72532e+06	1.40347e+06	2.54742e+06	2.86782e+06	2.88378e+06	1.15977e+06	1.14881e+06	1.2744e+06
PH02Gene03209	0.547454	0.0914069	0.896368	0.0461585	0.00981323	0.708265	9454.8	9267.14	11058.3	10507.6	11304.9	11410.7	8604.41	6436.67	8489.74
PH02Gene03218	0.00838279	0.00214769	1.18041	0.0138188	0.00334469	0.771029	73779.3	72190.3	63258	60388.3	51702.5	65158.4	42113.7	56226.5	38324.1
PH02Gene03229							22587.2	26389.2	25420.6				33518.8	35432.6	26308.6
PH02Gene03232	0.954332	0.14926	1.02284	0.00371016	0.00104621	1.03051	57791	13286.7	42723.3	38987.1	34815.7	37457.4	28914.5	55807.6	29932.6
PH02Gene03238	0.00385088	0.00108118	0.900901	0.000169508	7.47201e-05	0.766063	5218684	5474854	5.15323e+06	5767736	5.9777e+06	5844465	4475073	4534388	4465511
PH02Gene03244	0.0199192	0.00462555	0.865242	0.000222886	9.41217e-05	0.933844	125390	131965	131626	141805	154270	153489	132736	142044	145042
PH02Gene03245	0.0157344	0.00375262	1.16535	0.0425625	0.00911979	1.03059	769778	894390	763706	696998	644768	741611	810958	717980	618167
PH02Gene03246	0.0755585	0.0153066	0.964087	0.000143588	6.51347e-05	1.51816	148016	141585	151528	153779	147782	156000	221500	241133	232017
PH02Gene03247	8.01619e-09	3.44122e-08	0.703375	8.10733e-07	1.0291e-06	0.688091	732097	740751	740715	1.03695e+06	1.07127e+06	1.03884e+06	741808	731609	692049
PH02Gene03248	0.791446	0.126717	0.75307	0.0136764	0.00331455	1.1994	62615.5	18085.7	28277.7	37977.9	57691	49043.9	64583.3	61031.3	47953.7
PH02Gene03249	0.246227	0.0446557	1.02308	0.0280593	0.00625848	0.902444	194398	206968	185260	184344	188098	200950	177582	166147	173726
PH02Gene03255	0.00348612	0.000990249	1.23451	0.00114353	0.000375193	1.70186	47422.8	39810.9	52135.6	36627.2	32730.5	43536.6	63892.1	71936.6	56301.1
PH02Gene03262	0.166376	0.0313065	4.0015	0.000382471	0.000147855	3.14444	1.37997e+06	1.02434e+06	2216101	383218	736219	35231.4	942412	1.04802e+06	1.64036e+06
PH02Gene03268	0.00957487	0.00241538	0.712531	0.643951	0.105601	1.39098	657587	1.32398e+06	1.41868e+06	1.59015e+06	2040994	1.14091e+06	1.86223e+06	2.69765e+06	2.07796e+06
PH02Gene03275							7779.19	23310	13227.4	14901.7			27072.8	29330.6	36485.3
PH02Gene03277	0.0256416	0.00577939	2.52278	0.117254	0.0227981	1.39311	45241.9	98226.1	45250.1	32140	11762.6	30903	49512.3	26026.1	28673.9
PH02Gene03278	0.000589511	0.000212399	0.41908	0.0779208	0.0157347	0.581073	12757.5	16810	6677.73	34027.8	30682.4	21777.6	16232.1	17271.8
PH02Gene03288	0.000296426	0.00011953	0.651853	0.000240053	0.000100061	0.650548	252545	260534	250469	387516	395562	388272	269142	243785	249093
PH02Gene03290								10836.9	6947.94				16646.4	9068.93	15540
PH02Gene03291	2.61688e-05	1.61325e-05	0.439046	2.72658e-09	1.5815e-08	0.213727	112599	103826	105284	238808	252510	241428	69344.8	43844	43418.8
PH02Gene03298									11503.6	6491.59				6646.56
PH02Gene03302	0.849078	0.134788	0.9842	7.7926e-06	6.11665e-06	1.35462	292112	299292	264522	288146	293514	288006	397200	399324	381540
PH02Gene03303	0.473642	0.0802038	0.857038	0.0421413	0.00903551	0.620398	35290.6	18419.7	34784	32701.9		36135.4	27861.3	17616.9	18581.6
PH02Gene03306	0.000207266	8.84445e-05	0.859599	5.5895e-05	2.97739e-05	0.783933	1.42373e+06	1.44082e+06	1.38513e+06	1.65055e+06	1.62758e+06	1.66567e+06	1.26373e+06	1.29426e+06	1.31763e+06
PH02Gene03339	0.952244	0.14902	0.846998	0.0737477	0.014976	1.35669	82699.3	89746.8	62194.3	70490.9	108532	98003.1	135292	110289	130257
PH02Gene03342	0.00108394	0.000358271	1.57555	3.21218e-05	1.907e-05	1.43535	85174.4	69030.4	79504.5	49515.6	55566.8	43252.7	74491.6	71830.3	66591.4
PH02Gene03347				0.529993	0.088766	0.938163				147520	128388		122495	136904	128871
PH02Gene03350	0.00103588	0.000344408	4.72724	3.79389e-05	2.18092e-05	3.97308	342120	329588	301878	65743	67426.5	72783.1	274204	275624	268439
PH02Gene03361	0.00297389	0.000862809	1.98419	0.00331424	0.000948495	0.70784	35223	43332.5	47509.6	18659.1	20921.4	23954.3	18696.5	11548.7	14727.3
PH02Gene03371	0.166165	0.0312735	0.916022	0.0641339	0.0131859	0.702844	52790.8	42416	52039.8	63508.4	43851.4	53386	41635.7	46501.7	24841.9
PH02Gene03375	0.691319	0.112535	3.29646	0.151792	0.0287732	3.44301	10677	34169.4	151048	21941.2	9340.54	28144.2	56884.5	79518.2
PH02Gene03376	0.148916	0.0282942	1.16703	0.226143	0.0413315	1.02678	234492	268373	255259	193072	276845	179703	178557	239382	249079
PH02Gene03377	0.000850693	0.000290017	6.38692	0.57068	0.0948146	1.67394	489157	530580	518949	96919.2	43741.5	100252	98077.1	232602	72593.6
PH02Gene03378	0.238787	0.043425	1.29024	0.123779	0.0239536	1.23429	95315.5	90244.7	111343	93717.5	40345.4	96051.4	105963	78606.2	99458.3
PH02Gene03379	2.2584e-05	1.43229e-05	0.835533	1.12141e-07	2.33094e-07	0.776873	13187624	13023746	13075009	15901647	15602380	15515524	12327735	12079990	12120483
PH02Gene03389	3.94442e-12	2.63798e-10	2.37796	1.03414e-10	1.75208e-09	1.73812	2.29161e+06	2.32952e+06	2.27221e+06	971477	994081	933294	1.69834e+06	1.64434e+06	1.69589e+06
PH02Gene03391	5.39469e-07	7.52586e-07	0.199066	1.35766e-07	2.6863e-07	0.0211289	234535	222872	246224	1.15428e+06	1.18405e+06	1.19632e+06	22488.4	18813.2	33381.8
PH02Gene03393	0.000618353	0.000221011	0.804532	0.000361354	0.000140889	0.748968	1.12867e+06	1.28036e+06	1.23772e+06	1.5326e+06	1.50185e+06	1.49831e+06	1.14705e+06	1.11363e+06	1.13421e+06
PH02Gene03409							5219.75		18278.5				17216.2	16755.3	14664.9
PH02Gene03416	6.96145e-08	1.62528e-07	1.68154	1.29822e-05	9.13159e-06	1.69056	1.61521e+06	1.45202e+06	1.44059e+06	974821	806361	899584	1461545	1383450	1.68701e+06
PH02Gene03417	0.000546423	0.000199652	0.526838	2.81001e-05	1.71056e-05	0.14395	4.15482e+06	4.07819e+06	4273385	7544543	7.54907e+06	8644984	1.15321e+06	1.13236e+06	1.1316e+06
PH02Gene03418	7.4115e-09	3.26156e-08	1.93197	0.00699383	0.00182789	1.03665	2394232	2.44614e+06	2281573	1.26747e+06	1.24035e+06	1.17853e+06	1.36812e+06	1.18055e+06	1.27281e+06
PH02Gene03443	0.0212367	0.00489206	0.765862	0.00944924	0.00238718	0.803281	348202	362374	380506	481827	497544	445276	379774	407877	356740
PH02Gene03445	2.5686e-07	4.27714e-07	0.439506	3.7677e-07	5.70103e-07	0.365374	941621	1.00386e+06	947436	2.2223e+06	2167361	2.19253e+06	774312	798717	831934
PH02Gene03453	0.0125493	0.00307068	0.633551	4.27873e-05	2.39513e-05	2.68461	40399.8	44769.1	47651.9	67871.4	70706.1	71067.7	182068	205748	175000
PH02Gene03458	5.18482e-05	2.79515e-05	0.80706	0.015776	0.00376047	0.808432	67165.5	73568.8	63036.6	89581.6	72466.8	90436.7	64003.2	74055.7	66058.3
PH02Gene03468	0.000379051	0.000146861	3.73722	3.36001e-05	1.97711e-05	1.73582	301485	352275	257519	78354	94268.8	71216.2	143052	162525	117682
PH02Gene03475	1.2654e-07	2.53887e-07	0.632214	2.44406e-07	4.11368e-07	0.680688	1.26437e+06	1.30487e+06	1.35016e+06	2.06752e+06	2.11417e+06	2.0178e+06	1.45987e+06	1.39012e+06	1.36993e+06
PH02Gene03477	0.0260089	0.00585148	0.695477	0.000889364	0.000301097	0.405673	102976	89825.3	94281.2	142428	141292	129065	48091.9	61118.1	58245.6
PH02Gene03482	0.00259765	0.000767917	0.520334	0.244807	0.0444168	1.02588	27094.8	13789.4	14563.9	33521.9	37176	35864.5	39647.9	36458.3	33214
PH02Gene03483	0.104229	0.0204822	1.0402	0.141829	0.0270449	0.80306	114223	102988	184938	128757	136880	120969	72086.3	126108	112274
PH02Gene03490	9.14184e-06	6.93464e-06	0.864586	1.10471e-06	1.29766e-06	1.34397	611216	590633	607407	705469	697418	689740	948050	950758	913627
PH02Gene03493	0.00173921	0.000538917	0.702392	0.0114341	0.00282823	0.565757	70415	76813.5	92682.5	120342	110700	110520	67553.9	70186.5	55501.2
PH02Gene03494	0.0279384	0.00623579	1.43259	0.0268038	0.0060131	1.23789	71065.6	67265.6	90160.1	52547.7	50856.7	56090.7	55033.2	61589.5	80814.6
PH02Gene03500	6.29399e-05	3.28845e-05	16.6222	4.42409e-07	6.45314e-07	10.7661	5713845	5160719	4915621	319213	313443	317292	3.42777e+06	3.46002e+06	3.33949e+06
PH02Gene03507	4.52313e-05	2.50374e-05	0.739771	0.00123261	0.000400317	0.812613	656425	713170	686857	934430	941323	904097	769235	770443	719264
PH02Gene03519	3.76598e-05	2.16728e-05	4.94255	0.0284205	0.00633196	5.39172	8859.47	7334.17	6064.31	1425.91	1680.63	1396.78	1498.35	9888.58	12893.8
PH02Gene03527	0.0232048	0.00529322	1.31235	0.000906707	0.000306652	1.50219	189763	214878	222837	152910	157110	168112	243195	238123	236924
PH02Gene03533	0.1637	0.0308521	0.369255	0.00264527	0.000780394	3.23692	2561.21	545.488		2739.91	4798.91	5081.29	13122.9	12934.1	14793.2
PH02Gene03537	0.0214404	0.00493328	0.938791	0.00275155	0.000806606	1.16293	584696	620537	631760	638953	673365	644447	759876	759664	756043
PH02Gene03544	0.669883	0.109403	1.08466	0.639281	0.104934	0.994241	10354.7	35886.1	31088.6	22509.8	24354.4	24429.4	33514.7	10737.2	26631.1
PH02Gene03570	0.951401	0.148897	0.497427	0.0792	0.0159719	1.1882	49269	70273.2	23204.3	27270.5	242102	17596.9	125891	115454	99632
PH02Gene03571	0.000378911	0.000146829	4.81765	8.91475e-08	1.94996e-07	6.9516	231470	278951	183247	42777.9	53770.3	47436.5	350909	321661	328354
PH02Gene03572	0.00012466	5.77825e-05	0.87631	2.39508e-06	2.37765e-06	0.876471	780882	781007	816606	908427	914701	891088	759348	805614	813968
PH02Gene03573	0.696273	0.113214	0.925744	0.00133732	0.000428471	1.785	147155	199908	219082	159212	251388	200957	391235	351944	348451
PH02Gene03575				0.335027	0.0588814	1.34702				26333	26536.3	28423.9	38696.1	34823.4	35984.2
PH02Gene03585								441446				40339.2		155075	65436.7
PH02Gene03587	2.11892e-08	6.90847e-08	0.39278	0.00214197	0.000646629	0.760934	189297	248088	272120	642165	595230	568974	440577	460671	473280
PH02Gene03589	0.101133	0.0199284	0.94026	0.0724199	0.0147295	1.02426	26755.2	28819.4	37602.1	32777.1	44803.9	21515.8	31176.9	11298.3	59025.2
PH02Gene03592	0.104415	0.0205174	0.934231	0.687922	0.112088	0.961488	137386	132009	116388	133672	140764	138504	137933	145064	114040
PH02Gene03593	0.694107	0.112932	1.01709	0.00752998	0.00195177	0.935003	605854	604615	625764	592462	608511	604410	524354	582188	581496
PH02Gene03597	1.53285e-06	1.67997e-06	1.39854	3.43978e-08	9.79772e-08	1.72785	4.37812e+06	4464170	4.2605e+06	3.07156e+06	3165851	3.13153e+06	5308987	5.47518e+06	5403922
PH02Gene03601	0.000590177	0.000212582	0.823037	3.77825e-06	3.43743e-06	0.553024	182637	170922	175904	208286	229962	205056	118265	109212	128286
PH02Gene03602	0.977834	0.152362	0.983659	0.442257	0.0754363	0.866838	85325.3	406171	100696	188183	208130	205718	268947		78961.4
PH02Gene03607	0.00529338	0.00142877	0.802999	0.0776858	0.0156897	1.05078	40374.2	49324.7	40690.5	58272.9	64771.7	39333.4	56560.9	61439.6	52623
PH02Gene03615	0.0134426	0.0032643	0.859616	4.12955e-05	2.33351e-05	1.14509	333190	483806	410134	458071	477689	491773	551885	552735	530039
PH02Gene03618	4.28364e-06	3.79727e-06	0.513305	0.0346916	0.00758759	0.283471	28185.9	38231.3	47813.9	73520.5	74369.4	74650.2	6501.25	18499.4	38083.1
PH02Gene03619	0.00346245	0.000985253	1.6863	0.655488	0.107282	1.29517	168155	139039	179317	81069.7	102638	104801	131562	158357	83747.7
PH02Gene03620	0.0193305	0.00450299	0.639136	0.00017165	7.54471e-05	2.53485	132036	102966	85390.7	114924	155425	230942	394663	450771	425260
PH02Gene03621	1.43784e-05	9.9014e-06	0.466232	6.53289e-06	5.28503e-06	0.285881	2.21399e+06	2.2268e+06	2.09678e+06	4777969	4.53794e+06	4706205	1.43721e+06	1.33944e+06	1.232e+06
PH02Gene03622	0.0152925	0.00365869	0.420057	0.301078	0.0534882	0.703221	13306.8	21777	13788.3	32311.8	37179.6	46855.2	26513.8	22541.6	32762
PH02Gene03623	0.00213287	0.000644261	0.735524	0.00165856	0.000517015	0.761525	390945	439186	372795	476445	581343	577681	432843	352904	459702
PH02Gene03624												1448.23	2384.66	2283.38
PH02Gene03638	0.0039113	0.00109565	1.94489	0.055838	0.0116625	1.13986	48972.9	65898.3	34023.4	35141.5	20759.5	20655.9	33357.3	24466.6	29439.9
PH02Gene03639	0.00133599	0.00042815	0.877276	0.929302	0.145826	1.63318	51020.2	34767.9	24663.2	50173.2	44624	31105.4	87425	62539.6	55656.8
PH02Gene03642	2.67598e-08	8.21981e-08	2.42548	5.27256e-05	2.8389e-05	1.8246	953360	963919	973714	398428	385137	408362	724924	734591	715274
PH02Gene03651															1
PH02Gene03654							39977.2					3069.17	9259.62		9866
PH02Gene03655	0.598906	0.0989461	1.40539	0.241734	0.0439054	1.23378		57118.2	24710.4	27662.3	30562.6		43211.7	35819.3	28724.4
PH02Gene03657	0.0062812	0.0016608	1.26429	0.0776115	0.0156784	0.415418	593808		525222	469091	757459	101104	190720	243711	117101
PH02Gene03678	0.0652072	0.0133832	1.76217	0.115658	0.0225063	1.95899	209913	288987	214573	74314.2	195608		270631	267484	255045
PH02Gene03680	0.764791	0.122936	0.942447	0.165157	0.0310996	1.64942	49450.7	65949.8	35471.3		51022.3	55701.1	93421.7	113173	57453.5
PH02Gene03683	0.980914	0.15276	1.43278	0.000107546	5.10172e-05	1.85264	2.34593e+06	2.23639e+06	2.65021e+06	1.58382e+06	1.79209e+06	1671972	3302568	2.98074e+06	3.06861e+06
PH02Gene03684	0.00269965	0.000793826	1.22709	0.000127182	5.87833e-05	1.50551	3.18752e+06	3.28328e+06	2895953	2.58e+06	2.55709e+06	2.49622e+06	3.80811e+06	3925565	3.75832e+06
PH02Gene03689	0.60851	0.100373	0.865971	5.91801e-05	3.12987e-05	0.665088	389889	420516	420885	447951	466024	507886	327106	303561	314996
PH02Gene03690	0.532482	0.089154	0.841517	0.00647356	0.00170523	1.40605	34635.8	70731.5	51447.4	65135.4	58346.2	62866	91105.6	110984	59923.5
PH02Gene03697	0.000264157	0.000108389	1.66371	1.33962e-05	9.35926e-06	3.12478	70506.2	59612.4	63331.9	41349.3	34828.3	40099.3	131997	105789	125554
PH02Gene03699	0.247751	0.0449228	0.976505	0.00226433	0.000678906	1.4116	99145	115209	109872	121332	114030	96666.1	153646	161990	153054
PH02Gene03713	8.33015e-08	1.85268e-07	0.805155	1.36257e-06	1.53116e-06	0.917427	6197034	5.92637e+06	5854882	7.55768e+06	7.35581e+06	7.41548e+06	6716769	6.90447e+06	6.86395e+06
PH02Gene03724	0.0260877	0.00586717	1.01403	2.52255e-06	2.48233e-06	1.74387	130726	121429	123139	119648	134698	115753	216256	219844	209304
PH02Gene03728	0.000513898	0.000189639	0.761871	1.2379e-06	1.41913e-06	0.588967	481232	567063	572241	715216	700586	711248	359645	443944	449172
PH02Gene03732	2.09627e-05	1.35028e-05	0.844698	6.45741e-06	5.23214e-06	1.33462	219358	237510	241395	266091	286493	274057	384085	373235	345929
PH02Gene03733	0.101417	0.0199797	1.96111	0.000286724	0.000116214	1.23062	100720	79144.8	91106.7	48242.3	51289.7	38640.3	64364.7	58887.7	46785.8
PH02Gene03738	9.64516e-07	1.16824e-06	0.447602	1.73823e-05	1.15852e-05	0.589622	683096	617442	672354	1.49427e+06	1.51843e+06	1.39499e+06	897949	848271	852653
PH02Gene03741	0.563815	0.0938123	0.366522	0.281493	0.0503819	0.494732	12937.9	17340.7	32690.9	60803.1	52716.5	58283.4	29770.9	34392.9	20832.7
PH02Gene03742	0.0150343	0.00360522	0.977613	0.100852	0.0198836	1.49499		57200.5	65979.5	51470.7	60958.9	76571.4	89099.3	94189.3	99266.2
PH02Gene03744	0.0022053	0.000663201	1.41573	1.27982e-05	9.03044e-06	1.79836	141081	124053	138783	102956	81352	100998	175679	160539	176865
PH02Gene03755	6.35409e-06	5.16619e-06	0.501482	0.00840318	0.00215228	0.764069	162968	169915	152542	335277	327075	305627	318597	226759	194246
PH02Gene03765	0.000170062	7.4886e-05	4.2862	0.0106509	0.00265429	3.52479	51251.7	37495.3	50719.6	9650.43	13558.7	9329.38	35153.4	39000.5	40537.5
PH02Gene03772	0.00975379	0.00245502	0.624522	0.111013	0.0216823	0.846519	870374	923067	906901	1.28916e+06	1.34913e+06	1.68556e+06	1.26637e+06	1340585	1053272
PH02Gene03788	2.89022e-07	4.67924e-07	6.55641	5.27799e-09	2.54285e-08	7.71999	11760168	10427097	10055310	1.73682e+06	1.57121e+06	1.60968e+06	12488842	12404376	13071521
PH02Gene03789	0.70552	0.114566	1.87843	0.00240279	0.000715618	2.6842	74493.7	77624.5	87954.2	31739	48647.5	47418.4	119164	113615	110276
PH02Gene03791	0.0212568	0.00489627	0.76587	0.0238795	0.0054251	1.12502	38612.1	32820.1	47976.2	63722.2	47847.7	44342.1	66367.9	37855.4	71181.1
PH02Gene03794	0.000153354	6.88541e-05	0.986755	0.0923118	0.0183505	1.18565	195270	157424	182002	159345	194070	188457	226421	208008	208042
PH02Gene03795	0.254414	0.046015	1.14091	0.308511	0.0546739	1.19264	64159.2	58076.7		62403.1	49573.1	48732.3	60868.9	77857	52942.1
PH02Gene03806	0.165318	0.0311277	0.905225	4.94612e-08	1.27566e-07	0.345745	526786	489202	493338	565668	603263	498418	203268	167568	205642
PH02Gene03812	0.00286124	0.000834327	1.28396	0.000774664	0.000267545	1.54279	172443	154579	159310	132679	131946	114150	190095	196121	198156
PH02Gene03820	0.00184791	0.000568134	0.900463	1.9425e-06	2.02126e-06	0.774136	1.11307e+06	1.15181e+06	1.10548e+06	1.2465e+06	1.23556e+06	1.26086e+06	966724	942863	987946
PH02Gene03821	0.0081658	0.00209895	0.708977	0.00285841	0.000833596	0.701481	311414	347820	338462	479302	485760	442170	349787	315419	321939
PH02Gene03831	0.316853	0.0559799	1.5576	0.584339	0.0968046	1.46439	426905	418783	350188	323510	293524	150734	324656	447854	351802
PH02Gene03849	9.75011e-08	2.08339e-07	7.50352	0.000310476	0.000124191	9.69614	136780	157230	155771	24149.2	19924	15869.5	190072	199057	192085
PH02Gene03850	0.0338322	0.0074159	0.938298	0.000567133	0.00020589	1.44318	1150521	1.01338e+06	1.01887e+06	1.11096e+06	1.12015e+06	1.16097e+06	1.65365e+06	1.63785e+06	1.60389e+06
PH02Gene03864	0.250981	0.0454511	0.939795	0.0131645	0.00320428	1.18728	42853.6	50019.3	55399.4	53365.6	58086	46319.3	61754.5	62659.2	62904.9
PH02Gene03865	0.976518	0.152185	0.984626	0.000418824	0.000159435	1.19513	131645	102790	115768	123508	106367	125796	144472	144850	135749
PH02Gene03866	0.0509089	0.010736	2.06994	0.0318161	0.00701074	2.5741	21676.1	19271.8	13288.6	8662.29	7190.65	10349		20818.6	24145.8
PH02Gene03871	0.00161915	0.000506132	1.21346	0.0190282	0.00444454	1.18809	33716.5	26310.4	16162.1	9860.26	30465.6	22460.6	30036	20689.1	23870.9
PH02Gene03872	5.13541e-06	4.39017e-06	0.150635				7802.2	3261.42	9527.81	44678.3	44844.3	47175.3
PH02Gene03873	0.439694	0.0750634	8.88202	0.419199	0.0719056	1.6162		160627	24666	13186.8	6213.07	11892.4	5578.47	17641.6	27354.6
PH02Gene03877	0.111531	0.0217704	4.3314	0.0123648	0.00303269	4.31551	4353977	1428823	3.8229e+06	754139	724320		3717816	3.07363e+06	2779006
PH02Gene03878	1.53882e-05	1.04579e-05	0.735012	7.90366e-05	3.95641e-05	0.86548	592556	595674	594215	822758	777054	825243	730443	682366	686028
PH02Gene03887	0.556788	0.0927845	1.11376	1.42579e-05	9.83406e-06	5.80465	33885.4	53323.8	48977.5	35343.9	48742.7	38190	226731	244864	238177
PH02Gene03895	0.000342137	0.000134652	1.08518	0.00361968	0.00102359	0.675626	428255	408058	451091	393695	393255	399406	274448	257770	269314
PH02Gene03897	0.276227	0.0495077	3.0774	0.206427	0.0380987	0.668091	631033	868003	708187	132059	352309	232869	200475	201804	76900.2
PH02Gene03900	0.000666556	0.000235383	0.585519	0.00101615	0.000338629	0.625358	46452.1	45701.2	51375.6	71210.7	99940.5	73980.2	46506.3	55060.7	51727.8
PH02Gene03907	0.000231981	9.7288e-05	0.798411	3.7849e-05	2.1772e-05	0.793151	179650	183402	178980	215268	230917	232703	197216	166527	174717
PH02Gene03917	0.00497298	0.00135314	0.775214	0.000278781	0.000113509	0.732336	301580	270017	265301	391029	333318	355226	239524	292597	258488
PH02Gene03918	0.0178657	0.00420142	1.29892	0.10512	0.020648	1.04329	98060.8	155829		86962.4	119695	86537	112031	89330.3	104524
PH02Gene03919	1.05437e-07	2.21828e-07	0.429744	8.90855e-08	1.94996e-07	0.211725	61611.5	44170.8	51424.9	128635	114837	122344	27697.2	34366.6	15388.7
PH02Gene03929	0.380094	0.0659439	0.890457	0.0757992	0.0153481	0.732078	17722.1	16177.2	21670.1	22842.4	20702.4	18860.8	15975.2	12303.1	17407.5
PH02Gene03937	0.000469893	0.000175095	0.94571	4.97191e-06	4.2703e-06	0.715486	549569	559897	556699	562738	622649	576427	427825	434099	398628
PH02Gene03938	0.000702634	0.000245846	0.530871	7.31349e-06	5.79712e-06	0.350672	248015	256801	246728	476254	466740	472686	156517	172466	167456
PH02Gene03939	0.807734	0.129015	1.22306	0.00477828	0.00130741	0.652923	233692	116470	120053	128372	126430	129657	80567.8	86942.7	83511.8
PH02Gene03943	0.938685	0.14712	0.152408	0.445037	0.0758706	0.515246	29609	44779.7	44365.7	314485	432573	32128.5	24282.2	29546.2	347644
PH02Gene03951	0.0039877	0.00111368	0.530181	0.00303289	0.000878057	0.508419	43065.1	50809.8	63473.2	86962.5	102613	107206	44722	53063.3	53104.2
PH02Gene03953	5.8464e-05	3.09642e-05	0.710956	9.68379e-05	4.68728e-05	0.602862	977819	1.02843e+06	1.06594e+06	1.45888e+06	1.46494e+06	1.3974e+06	857401	886539	861155
PH02Gene03958	0.0364918	0.00794846	1.35211	0.0980179	0.0193881	1.75057	137708		137080	171816	26708.3	106318	287236		68528.5
PH02Gene03970	8.0076e-09	3.44122e-08	0.576345	4.18835e-07	6.1683e-07	0.642511	835453	785069	833032	1.43072e+06	1422065	1.4043e+06	899996	916879	918352
PH02Gene03971	0.926469	0.145478	1.01661	0.000705633	0.000246795	1.25465	983650	936206	885036	937210	917883	903957	1.16711e+06	1.15313e+06	1.14142e+06
PH02Gene03972				0.691717	0.112579	0.857646				36095.8	49051.6	14379.2	22795.5	31677.7	30885.5
PH02Gene03981	0.000145361	6.57893e-05	0.773378	0.000354881	0.000138867	1.10122	674229	739876	756075	910224	947174	948707	1.01763e+06	1.03387e+06	1.03863e+06
PH02Gene03985	0.771372	0.123816	1.01079	0.000531204	0.000195164	1.44573	68344.1	71410.4	65483	70202.6	64691.8	68151.8	95122	96347.9	102079
PH02Gene03988	0.00145115	0.000459996	2.05245	0.000161744	7.18247e-05	4.19607	45763.7	52486.6	56750.7	25338	25611.2	24570.9	110352	100346	106189
PH02Gene03989	1.01627e-06	1.21727e-06	0.498279	0.000107658	5.10521e-05	0.821033	2.12045e+06	2.1414e+06	1.97983e+06	4283461	4.16391e+06	4.07909e+06	3445233	3.36675e+06	3.47267e+06
PH02Gene03994	2.1081e-08	6.90797e-08	2.63995	1.43543e-10	2.15065e-09	3.25078	1489927	1.39964e+06	1.41045e+06	557693	542036	529092	1776999	1.78584e+06	1.73211e+06
PH02Gene04006	5.9507e-07	8.10947e-07	0.708361	5.27869e-08	1.33267e-07	0.649472	736353	765680	811016	1.08467e+06	1.09847e+06	1.08222e+06	707492	730550	682716
PH02Gene04008	2.95596e-07	4.75806e-07	0.563772	4.58065e-08	1.20294e-07	0.630669	973334	981111	974894	1.74765e+06	1.74022e+06	1.70809e+06	1123130	1.09534e+06	1.05846e+06
PH02Gene04016													53971.4
PH02Gene04018	2.61074e-07	4.32398e-07	0.62605	2.10968e-07	3.67e-07	0.575871	386757	402436	382478	644675	610810	616043	362057	367443	348259
PH02Gene04019	0.000680659	0.00023945	1.75506	3.92293e-10	4.18446e-09	13.1116	37739.1	25581.7	33253.1	29570.2	15372.7	10083	243922	250159	227398
PH02Gene04021	0.481522	0.0814	1.70935	0.377501	0.06556	3.51644	24031.1	53639.8	7080.2		13778.9	19275	131870	25914.3	16564.3
PH02Gene04028	0.859514	0.136186	0.973239	7.79435e-05	3.91454e-05	0.884954	738385	724442	791381	782910	808753	724530	715550	671006	663168
PH02Gene04032	8.6214e-09	3.62154e-08	0.59361	2.82075e-05	1.71508e-05	0.511084	1.09748e+06	1.08373e+06	1.07471e+06	1.83593e+06	1.81645e+06	1832541	884350	969188	949719
PH02Gene04036	0.18511	0.0345183	0.908136	0.571441	0.0949166	0.985874	54412.7	40899.2	43211.7	51192.2	54603.8	46740.2	50100.8	53431.2	46849.5
PH02Gene04046	0.387865	0.0671394	0.628785	0.441655	0.0753387	1.34547	48400	13340.5	26135.6	47104.1	71196.6	21454.8	86729.9	53597.9	47708.5
PH02Gene04047	0.00705928	0.00184229	0.937299	3.62686e-06	3.33481e-06	0.834901	1938922	1.83725e+06	1.74159e+06	1.9903e+06	1974603	1.92197e+06	1.66131e+06	1.62712e+06	1.62652e+06
PH02Gene04049	1.83435e-05	1.21168e-05	1.45792	0.0026541	0.000782465	2.11737	132178	132429	144061	86746.5	97532.4	96029.4	188734	201566	203216
PH02Gene04056	0.000780525	0.000269426	0.61276	6.71106e-07	8.88864e-07	0.50931	36623.5	33802.7	32117.8	58583.9	54559.9	54203.9	24221.3	30278.8	30731.9
PH02Gene04057	0.00177511	0.000548859	6.16727	0.000140852	6.40841e-05	3.9431	231697	204114	207031	31970	42059.5	30204.8	140640	145851	124516
PH02Gene04059	0.0280117	0.00624892	1.30805	0.0484065	0.0102487	1.28058	575382	608792	723928	574224	464746	419766	638496	727044	502494
PH02Gene04062	2.86718e-05	1.73817e-05	1.98959	2.04657e-07	3.59154e-07	2.76127	377889	434522	419382	213719	214166	191233	588677	574357	546522
PH02Gene04067	7.31967e-05	3.71942e-05	1.66566	0.0150709	0.00361267	0.778981	631864	621337	645857	386138	407363	346623	323918	331438	232779
PH02Gene04071	0.00185509	0.000569851	1.35245	6.41936e-06	5.20782e-06	0.933943	4792915	4.50938e+06	4413420	3.40635e+06	3.3947e+06	3.34035e+06	3.07761e+06	3.20399e+06	3.18988e+06
PH02Gene04073	0.00128008	0.0004133	0.970527	0.149287	0.0283519	1.03217	165389	185551	165197	171845	180214	179751	180014	181859	187045
PH02Gene04080	0.0235817	0.00536597	1.60206	2.93927e-08	8.76648e-08	4.06818	61160.2	37598.5	48200.1	36898.5	29232.2	25600.5	126736	130811	115632
PH02Gene04084	0.807902	0.129033	0.848964	0.0270195	0.00605479	1.36218	118446	55967.6	99551.8	136817	103738	82149.4	119499	171720	148362
PH02Gene04086				0.197436	0.036614	1.20254				35308.4	63003.6	24261.1	52374	38352.6	56672.3
PH02Gene04087	1.97751e-08	6.62234e-08	4.15064	2.33399e-06	2.32909e-06	1.19571	2.70105e+06	2658138	2638527	617733	663153	645976	782596	769307	752074
PH02Gene04088							19679.1	10475.4	5988.63				27489.5	13368.8	13780.8
PH02Gene04090	8.57546e-06	6.59768e-06	1.40053	0.438674	0.0748991	1.00823	699101	615548	640383	450035	473849	472037	477575	470173	459663
PH02Gene04091	0.267827	0.0481755	0.988429	0.00266113	0.000784358	1.37376	432270	412459	357610	388435	402297	425681	559758	550449	560851
PH02Gene04099	3.34208e-05	1.96969e-05	1.23016	0.000670491	0.000236483	2.1099	172633	149433	143012	123790	122817	131456	280683	278701	238292
PH02Gene04103	0.971195	0.151483	1.04337	0.904965	0.142481	0.884912	7576.19	10358.7	120338	14478.8	110506	7540.92	18407.7	59774.8
PH02Gene04113	0.00206886	0.000626532	0.834037	1.42635e-05	9.83534e-06	0.628671	569327	567177	552181	684776	666912	673025	432804	425441	414632
PH02Gene04115	0.0036167	0.00102297	0.284141	0.713719	0.115695	1.05659	11265	15674	6433.79	40425.5		37875.5	31039.4	46314.5	46743.9
PH02Gene04141	0.0144967	0.00349051	0.757554	0.00115046	0.000377229	1.19289	52691.3	54017.7	52641.7	67583.3	78968.9	63796.8	90190.4	76603.1	84129.1
PH02Gene04145	0.0303937	0.0067259	2.08443	0.643902	0.105599	1.10062	60051.6	65900.8	77451.3	25919.8		39135.1	73902	10565.7	22934
PH02Gene04147	0.305009	0.0541161	0.751192	0.490921	0.082886	1.11864	1219.74	1767.38		2467.03	2004.19	1493.53	1330.75	2854.54	2487.13
PH02Gene04151	2.18859e-06	2.21163e-06	0.542639	1.28376e-07	2.56554e-07	0.128512	1.11382e+06	1.10824e+06	1154880	2.03405e+06	2.1257e+06	2.06343e+06	271018	263134	265600
PH02Gene04157	0.389707	0.0674312	1.13621	8.50931e-05	4.2116e-05	0.760309	207551	178260	184384	144935	162501	194406	122926	157034	101594
PH02Gene04166	0.000553821	0.000201843	0.544475	0.0192019	0.00447664	1.27205	122669	139767	94283.3	211213	237462	206487	308680	283646	241070
PH02Gene04178	0.380625	0.0660273	2.1228	0.47191	0.0799262	0.590732	254078	145823	180831	49914.2	164517	59138.6	99055.5	62543.3	7.63523
PH02Gene04181	0.0498361	0.0105269	0.405836	0.0256514	0.0057811	0.18367	16616	14650.8	25468.2	49842.8	56086.1	33869.2	9804.18	7313.65
PH02Gene04190	0.00286822	0.00083585	0.7785	0.000375743	0.000145906	0.859339	3.08902e+06	3.01795e+06	3.13213e+06	3.94743e+06	3755323	4.16507e+06	3.34615e+06	3425026	3.4273e+06
PH02Gene04191	0.000206706	8.82528e-05	1.46168	0.00404814	0.00112886	1.30338	110103	102563	104776	82553	65489.2	69133.8	92960.4	94861.5	95240.8
PH02Gene04192	0.000510935	0.00018868	0.383522	0.01246	0.00305144	1.44566	25081	28300.1	24543.7	71490	74402.2	57289.5	99971.4	101076	92683.4
PH02Gene04196	7.02693e-05	3.59373e-05	1.09102	3.55574e-07	5.46324e-07	0.782316	7642411	7633093	7309640	6.86495e+06	6.83038e+06	7.00553e+06	5.3224e+06	5.31936e+06	5.55285e+06
PH02Gene04208	0.225776	0.041279	0.185107	0.326735	0.0575611	0.392191	17855.2	43330.1	51750.1	294095	304760	11253.3	57015.5	96965.9	85297.6
PH02Gene04218	0.212346	0.039091	1.17326	0.0740172	0.015026	1.21986	134933	146944	162152	121245	135387	121825	140540	160026	161097
PH02Gene04220	4.62807e-05	2.55016e-05	6.07797	8.63468e-09	3.62154e-08	2.39462	845929	870928	818909	173501	115942	127763	348932	297709	352409
PH02Gene04230	9.86306e-05	4.75717e-05	1.5474	0.00184369	0.000567154	1.2143	3.8063e+06	3938048	4.1136e+06	2315143	2.64872e+06	2699258	3.39994e+06	2.78807e+06	3.11734e+06
PH02Gene04233	2.10133e-06	2.14097e-06	0.70641	2.27214e-05	1.43924e-05	0.695224	2.42684e+06	2.30036e+06	2232386	3.26789e+06	3.28407e+06	3300094	2.16666e+06	2.36527e+06	2.31745e+06
PH02Gene04234	2.32248e-05	1.4654e-05	1.48307	0.000239194	9.98055e-05	2.33426	180270	176696	183328	117334	122379	124593	286144	296036	268207
PH02Gene04237	3.41004e-08	9.73438e-08	164.722	0.000230938	9.69474e-05	280.334	6.07424e+06	7.48623e+06	7.88199e+06	45471.2	43229.5	41472.6	11951229	12663114	11877619
PH02Gene04241	0.103232	0.0203096	1.07194	0.00117971	0.000385552	1.1594	363191	360152	370661	364247	340300	316038	385752	355716	441801
PH02Gene04242	0.908425	0.142962	1.25854	0.00495184	0.00134825	0.553067	168471	1.21993e+06	251028	928885	198887	174869	437514	129036	153898
PH02Gene04243	0.00215862	0.000650977	1.28589	0.0433633	0.0092722	0.803694	276075	256503	254746	206046	188253	217980	194893	164547	132645
PH02Gene04247	0.000118653	5.54223e-05	0.830519	0.000179448	7.83181e-05	0.831485	220528	215689	221813	245260	284812	262239	211152	228359	219283
PH02Gene04254	0.0368693	0.00802193	1.12968	0.00295207	0.000857342	1.56002	334035	336360	289626	317162	279296	253357	455054	465205	405473
PH02Gene04257	0.251012	0.0454536	0.693439	0.00277965	0.000813808	0.583205	32930.2	22430.3	40562.3	53318.4	56220.7	28790	24361.6	24798.8	31513.8
PH02Gene04258	0.000290625	0.000117574	2.38201	0.000281344	0.000114376	0.295393	221521	293163	269723	94942	111103	123260	35726.2	21428.8	40119.2
PH02Gene04262	0.0143829	0.00346633	1.45509	0.000382979	0.000147985	1.8196	198858	185429	187205	129617	128504	134633	246341	233428	234885
PH02Gene04281	0.88235	0.139285	1.14039	0.000180072	7.85505e-05	1.87066	141070	128125	100140	102462	104751	116656	220739	190806	194301
PH02Gene04288	2.47941e-08	7.75225e-08	1.81382	0.00077053	0.000266331	1.33989	296340	284910	294690	176751	155848	150326	252380	205679	189006
PH02Gene04294				3.88705e-06	3.51544e-06	0.218928	129021			586442	561936	538503	174030	27520.8	167754
PH02Gene04298	0.346996	0.0607853	0.886126	0.000125313	5.80539e-05	1.76162	230685	155558	242533	247307	205708	256564	392601	397308	460100
PH02Gene04309	0.114877	0.0223696	0.500437	0.282009	0.0504638	0.56734	23608.4	14926.7	53036.5	64019.7	57648.5	61314.9	45595.4	30117.7	28100.5
PH02Gene04314	3.35296e-06	3.1341e-06	1.53766	1.67187e-06	1.8005e-06	1.81899	442491	445514	493187	335513	289744	272985	505127	544526	584243
PH02Gene04316	0.0361369	0.00787912	0.969494	7.61235e-07	9.84472e-07	1.65177	1.49867e+06	1.39514e+06	1383233	1.46184e+06	1.48025e+06	1469528	2.46158e+06	2529524	2.29589e+06
PH02Gene04324	3.96617e-08	1.08442e-07	2.45818	4.5452e-07	6.57798e-07	5.52421	4152411	4.12925e+06	4.15591e+06	1652428	1.75083e+06	1.65641e+06	9303732	9386727	9260215
PH02Gene04325	0.155736	0.0294691	0.627739	0.143948	0.0274206	0.742438	187892	137197	89725.3	224679	208613	227516	149608	156314	184687
PH02Gene04328	0.202617	0.0374676	0.983072	3.15207e-06	2.97097e-06	0.720431	3.5998e+06	3647869	3.53436e+06	3580021	3.81987e+06	3567790	2661717	2633203	2.60654e+06
PH02Gene04338	3.64208e-06	3.34287e-06	1.58475	4.53518e-07	6.57081e-07	2.10745	326202	319680	361535	216362	218909	200423	456223	420570	462900
PH02Gene04344	0.000457422	0.000171335	0.450812	0.00291269	0.000847139	0.69846	394716	462345	457683	1.02534e+06	1.08277e+06	808280	755486	673600	607895
PH02Gene04351													17261.7	17126.8	7270.84
PH02Gene04357	4.83689e-05	2.64108e-05	1.7217	2.13661e-10	2.82555e-09	2.48511	1.60935e+06	1.57123e+06	1.56533e+06	963516	903618	889401	2323056	2.28315e+06	2.2441e+06
PH02Gene04358	3.85221e-07	5.77497e-07	1.33293	1.78103e-07	3.2579e-07	1.9064	110599	112232	122103	81038.3	91006.5	86734.2	158594	170401	164341
PH02Gene04362	0.00570772	0.00152661	2.26737	0.000258907	0.000106657	3.28436	169666		117992	48145.9	78722.9		173722	184935	266366
PH02Gene04365	0.219859	0.0403479	0.724092	0.042475	0.00910179	2.10616		13495.3	9493.27	17570.1	16520	13532	39662.4	25570.9	35066.9
PH02Gene04366	0.00928734	0.00235155	1.68841	0.181926	0.0339809	1.20119	26029.5	25433.6	18607.2	15795.8	12250.6	13454.4	20635	19919.9	9295.4
PH02Gene04368	0.00397502	0.00111074	0.64835	0.435439	0.0744056	0.947363	89625.8	72347.8	62586.2	124271	109320	112765	119845	117637	90642.7
PH02Gene04369	0.00124559	0.000403976	1.37162	8.53964e-05	4.22258e-05	1.52526	397215	337269	287615	273690	243469	228015	418935	355291	362358
PH02Gene04372	0.0503864	0.0106327	0.899115	6.07574e-08	1.48289e-07	0.539475	821954	881528	859553	939440	984429	926750	524224	536209	477405
PH02Gene04385	0.786131	0.12596	0.991961	0.660564	0.108051	1.11167	56104	77818	82493.2	66966.7	79653.3	71549.1	79309.8	67948.9	95274.1
PH02Gene04386							26873.5	40445.9	34537			7340.36	82682.1	80603.2	84792.9
PH02Gene04388	0.000280946	0.000114247	0.657018	0.000444341	0.000167306	0.736098	193764	201845	209191	290784	302693	327045	214361	240945	222288
PH02Gene04395										123096	45275.4	37716.5
PH02Gene04399	0.0127041	0.00310389	0.883077	0.884654	0.1396	1.09932	20922.4	20360.3	21953.4	16338.8	29392.1	25877.8	27307.2	28019.9	23393.6
PH02Gene04406	0.000454118	0.000170344	0.691821	0.00943036	0.00238376	0.716241	47614.4	23433.8	31451.9	37850.7	51345.8	58963.3	41999.2	20058.3	44060.7
PH02Gene04408							10629	17255.4	20112.8		6971.79		57698.4	50501.3	46380.1
PH02Gene04414	0.0454002	0.0096655	4.04574	0.00297803	0.000863913	1.29787	124864	174138	409745	72132.1	58908.7	44142.6	57754.1	91308.8	78303.2
PH02Gene04415	0.665814	0.108814	1.52447					30084.9	117565	63796.9	33056.3		133220
PH02Gene04421				0.030642	0.00677275	2.44393			63176.6	45618.2		18844.6	88938.3	68604.1
PH02Gene04423	2.76088e-09	1.58674e-08	0.557573	9.09194e-07	1.12064e-06	0.505929	28027514	27120070	25908820	48550788	47443840	49379032	24390016	24131844	25026896
PH02Gene04424	0.00079869	0.000274854	0.908479	2.06515e-07	3.61437e-07	0.759446	5.91928e+06	5.97052e+06	5982745	6.56665e+06	6.49308e+06	6613311	5.0245e+06	5.02629e+06	4889816
PH02Gene04425	0.000121909	5.66794e-05	1.30956	2.12265e-05	1.36253e-05	0.75542	646303	640873	661526	491765	497891	498400	372272	375775	376060
PH02Gene04434	1.02954e-06	1.23032e-06	0.720029	1.43385e-07	2.80699e-07	0.493335	6293281	6050365	6069252	8552239	8486497	8533692	4264930	4.17805e+06	4.17279e+06
PH02Gene04436	0.0456396	0.00971007	1.20261	0.0223203	0.00511306	1.74064	120983	114387	126681	107392	122747	70916.4	190454	166464	167112
PH02Gene04438	0.85258	0.135269	1.17638	0.00571435	0.00152807	0.64859		8695.68	38934.4	17259.8	19378.4	24094.9	18341.1		7919.49
PH02Gene04444	0.000119592	5.58327e-05	1.50094	0.102749	0.0202161	1.03699	429939	427954	462248	288271	282008	309265	298022	316078	297976
PH02Gene04451	0.0038549	0.00108189	0.545192	0.712116	0.115485	0.910122	93581.9	80426.1	68193.8	148719	141780	153751	135414	145957	122951
PH02Gene04455											2937.62	1458.86	3574.36
PH02Gene04459	0.00886071	0.0022552	0.573075	0.000106854	5.0717e-05	0.289092	3.00852e+06	3.31053e+06	1.85392e+06	4288878	5332226	4640493	1.40023e+06	1.33593e+06	1.38675e+06
PH02Gene04463	0.00146002	0.000462298	0.897641	0.348756	0.0610753	1.00251	2.10543e+06	2.09099e+06	2.29862e+06	2430234	2.39949e+06	2405940	2.37155e+06	2.47152e+06	2.41073e+06
PH02Gene04472	0.0435747	0.00931203	1.24605	0.000975098	0.000326756	1.69474	65841	74597	74955.4	68797.5	54903.1	49160.4	98005.6	96956.4	97992
PH02Gene04479	0.817834	0.130459	0.792648	0.552237	0.0921156	1.63265	57271.8		87337.3	233871	17513	22273	217312	182741	46733
PH02Gene04490	0.629887	0.103531	1.90725	0.506021	0.085125	1.54485	23785.4	24145.3	32593.1	17187.5	12502	12530.4	24948	23394.1	16881.3
PH02Gene04491	0.0126081	0.00308245	1.4768	0.407744	0.0701915	1.30959	188882	193158	191731	137621	137474	113428	163389	182521	162895
PH02Gene04496	0.96301	0.150405	1.04657	1.6679e-07	3.11694e-07	2.10992	113566	166753	160699	137583	147251	136559	294329	312858	281918
PH02Gene04502	0.00620791	0.00164361	1.66223	0.55748	0.0928774	0.875942	108937	127188	118187	82505	89807.5	40841.9	91334.6	35046.6	60329.6
PH02Gene04511	1.05108e-06	1.2503e-06	0.544262	1.2967e-05	9.12586e-06	0.714999	1.017e+06	1.10208e+06	1.15548e+06	2.01745e+06	1.9117e+06	2.08735e+06	1.443e+06	1.49944e+06	1.35935e+06
PH02Gene04513							6175.53		3234.03		1076.65				4142.42
PH02Gene04527										7477.88	8370.41	5153.23
PH02Gene04533	0.0252933	0.00570932	0.936091	0.226566	0.0414029	1.0974	400515	399009	371107	410630	444261	395661	460619	468182	443553
PH02Gene04539	0.886881	0.139915	1.13841	0.0160926	0.00382575	1.27884	250014	247046	210361	202824	209005	209582	265767	269093	259822
PH02Gene04548	5.17385e-05	2.79097e-05	0.649421	0.000356553	0.000139394	1.61596	79163.2	70374.9	87036.1	96260.6	135353	132671	193805	196839	198024
PH02Gene04550	5.10932e-06	4.37075e-06	0.684393	1.11296e-05	8.0852e-06	0.812582	226286	223468	223598	330587	326974	326305	266367	277278	255828
PH02Gene04553	5.28043e-11	1.19016e-09	0.139957	2.81648e-10	3.33348e-09	0.0327841	727084	763041	726168	5149378	5.33999e+06	5.34616e+06	195448	171062	152643
PH02Gene04554	3.58779e-08	1.01038e-07	0.0624437	4.23706e-06	3.77145e-06	0.0060506	100534	37210.3	75554.3	1.13712e+06	1.13171e+06	1.14702e+06	8122.77	5655.9
PH02Gene04570	0.00158091	0.000495372	1.38921				210202	231993	216675	185299	130886		221069
PH02Gene04576	6.58028e-06	5.31508e-06	1.24781	0.00404049	0.00112697	0.911129	1.39652e+06	1.45012e+06	1.4182e+06	1.16319e+06	1197110	1.05756e+06	1.07385e+06	1.02901e+06	1.01126e+06
PH02Gene04602	0.260533	0.0469938	1.19647	0.023323	0.00531448	0.961215	525800	518000	700822	439760	502163	516222	472210	493756	435624
PH02Gene04603	0.0116704	0.00288092	1.64472	0.0220664	0.00506249	1.29225	493597	436367	377056	263185	171263	360226	323238	311538	392138
PH02Gene04608	0.163919	0.0308912	2.65042	0.0179735	0.00422215	1.68238	87654	22156	69805.8	27635.8	26853.7	13279.3	58318.9	32480.8	23212.8
PH02Gene04611	0.523911	0.0878494	5.43084	0.0235149	0.00535311	1.641	12754.6		199191	22372.1	19095.8	17071.5	29407.4	35301.7	31354
PH02Gene04614	0.134799	0.0258431	1.19071	1.16823e-06	1.35665e-06	1.79564	278423	322502	300479	244120	262325	250588	448416	451141	459799
PH02Gene04615	1.16068e-07	2.39149e-07	1.23157	2.18955e-08	7.0853e-08	0.675291	1.55169e+06	1.60955e+06	1.57758e+06	1289395	1240355	1.31805e+06	874467	866351	857564
PH02Gene04620				0.789859	0.126502	2.22118		91188.1			38133.2	25409.5	88374.1	90374.1	32961.7
PH02Gene04624	0.128081	0.0246884	0.948161	7.69629e-06	6.0561e-06	1.21613	244185	277714	263846	276665	289175	262863	331361	343544	332908
PH02Gene04629	5.10396e-05	2.76247e-05	1.74705	0.0656055	0.0134575	1.05485	232887	202186	209569	125314	126437	117237	133787	142180	113259
PH02Gene04646				0.00505027	0.00137172	0.529967				18487.8	16286	17954.9	9271.38	8021.15	10652
PH02Gene04647	0.00025974	0.000106932	1.91047	4.72631e-06	4.10267e-06	3.60895	175989	178590	182393	96059.4	89894.2	95115	330744	339241	344379
PH02Gene04648	0.00366743	0.00103567	1.30144	0.0041967	0.00116465	1.52024	95531.9	80698	77422.5	67145.1	66189.6	61566.7	101884	97582.7	96831
PH02Gene04649	1.42137e-06	1.5812e-06	1.61105	0.0132463	0.00322147	1.69658	281409	259839	245397	156735	176572	154973	287839	267565	273003
PH02Gene04655	0.00098871	0.000330633	3.28668	0.00588635	0.00156857	2.9037	14631	16731.1	11763.2	4384.41	2249.69	6487.12	13177.9	11376.3	13545.8
PH02Gene04660	0.412336	0.0709019	1.08948	0.117396	0.022819	0.744661	61706.6	66975	43747.8	52168.4	50353.6	55746	42655.1	38337.1	36863.7
PH02Gene04668	0.226004	0.0413119	0.95833	0.387502	0.0670812	1.06904	23864.9	23155.4	26627.8	24199.5	28022.2	24628.8	21628.2	27721.4	32806.5
PH02Gene04686	0.0238867	0.00542584	2.05834	0.00430184	0.00119141	3.5933	1502.69	3361.23	3412.4	1432.98	1241.45	1346.43	5144.27	4190.25	5113.65
PH02Gene04689	0.447175	0.0761799	0.980565	0.127251	0.024554	1.28478	82381.7	112679	87325.4	103629	105453	78900.5	131287	115051	123658
PH02Gene04690	0.0140117	0.00338568	1.13386	0.222049	0.0406894	1.01027	130474	123804	97101.4	102780	103650	103466	113980	101099	97998.8
PH02Gene04692	0.18215	0.0340177	0.826502	0.66508	0.108715	0.484044	24435.5	15572.3	27896.1	24693.5	31067.2	26397.5	17673.9	14784.5	7309.77
PH02Gene04693	1.08099e-06	1.27651e-06	0.646543	2.06973e-07	3.6175e-07	0.600585	361307	375924	372551	587170	556335	572982	344491	329143	357261
PH02Gene04705	1.46498e-07	2.83564e-07	0.729063	0.00598439	0.00159142	0.956167	1.88184e+06	1.68558e+06	1.85124e+06	2.37516e+06	2.56919e+06	2.488e+06	2.43905e+06	2368853	2.29867e+06
PH02Gene04707	0.000178005	7.7832e-05	1.35078	0.0020162	0.000612044	1.11916	41973.6	40281.8	39749.8	34967.2	26446	28908.9	37428.8	35959	27697.1
PH02Gene04708	0.556815	0.0927845	1.22071	0.167796	0.031553	1.3133	44568.4	36633.8	45261.6	35303.7	33307.8	34986.9	54639.8	42688.1	38727.7
PH02Gene04709	1.88302e-05	1.23784e-05	0.652151	0.000374568	0.000145535	0.729575	673709	789422	758530	1.13086e+06	1.13353e+06	1.14228e+06	854591	843388	787439
PH02Gene04712	0.0430487	0.00921026	0.935507	0.106003	0.0207962	1.82478	37021.1	98943.8		85338.2	84997.6	47671.4	118163	129715	149937
PH02Gene04714	0.000273942	0.000111803	0.881999	0.00801347	0.00206491	1.54135	39269.4	34475.4	23521.7	38093.8	42738.8	29447	44711.4	68352.5	56915.8
PH02Gene04716	0.00512619	0.00138986	0.756413	0.025469	0.00574699	0.726586	37421.2	28973.7	28107.5	43308.2	44301.9	37324.9	31161.4	41542.3	18072.3
PH02Gene04717	0.00066704	0.000235522	1.85952	4.07065e-07	6.03611e-07	1.9943	703042	675868	726496	369399	379701	383130	771498	783702	702807
PH02Gene04720	0.377955	0.0656168	1.70478	0.386587	0.0669404	0.812254	8576.27	60759.2	28868.1	10541.9	26615.6	20447.5	6527.25	6814.91	33447.7
PH02Gene04723	0.00725982	0.00188892	0.76521	1.44901e-05	9.95608e-06	0.652356	66020.6	66146.5	68822	89732.9	83407.3	89518.6	59123	55335.7	56888.2
PH02Gene04731	0.134012	0.0257056	1.04777	0.0022236	0.000667929	0.830658	3270268	3256643	3279130	3.13816e+06	3.09936e+06	3.12141e+06	2.61932e+06	2601216	2.55354e+06
PH02Gene04732	0.000132281	6.07821e-05	1.47156	0.00128323	0.000414213	4.29595	21653.1	28647.9	20693.8	15821.1	18671.9	13751.7	78347.9	65936.1	62973.1
PH02Gene04734	0.00686647	0.00179686	1.63665	0.00189541	0.000580927	1.91766	19687	19564	14530.6	9404.33	8481.42	14975	24220.2	20329.3	18466.2
PH02Gene04743	0.000645119	0.000229104	1.8138	0.00240217	0.000715518	2.44438	141903	155535	140599	86762.3	46775.4	107964	206279	200566	183478
PH02Gene04755	0.115487	0.0224765	18.8567	0.145161	0.0276437	152.685		109447	75521.5		5543.72	4265.46	471360	667344	1.10787e+06
PH02Gene04758	0.0449721	0.00959168	2.94949	7.79831e-07	9.98912e-07	3.8016	45009.4	34304.7	49499.3	14985.2	19931.9	8755.98	55191.7	58010.7	52825.2
PH02Gene04762	5.38066e-06	4.55476e-06	1.68877	3.16442e-07	4.992e-07	1.66219	218251	177647	212282	125635	103302	131196	216454	181750	200405
PH02Gene04772	9.57511e-06	7.20008e-06	4.44735	1.24787e-05	8.8616e-06	1.80143	1.26664e+06	1.27326e+06	1339523	301164	293766	277369	531143	502213	538025
PH02Gene04776	0.000247943	0.000102942	2.24573	2.8118e-05	1.71124e-05	2.49945	688171	719738	724906	318582	318205	312931	806440	775101	792230
PH02Gene04777	0.127536	0.0245963	2.54937	0.142224	0.0271103	2.16928	223538	157839	189914	29332.8	98443.6	96314.8	217631	158989	109497
PH02Gene04787	0.00168151	0.000523039	2.31697	0.0115263	0.00284996	1.61416	873576	464324	490365	289056	261816	238202	507656	378395	387637
PH02Gene04793	0.309073	0.054766	1.22868	5.67939e-05	3.02092e-05	1.3352	1.27676e+06	1103279	1.05139e+06	878150	923310	991313	1311476	1.28753e+06	1129911
PH02Gene04795	0.00360141	0.00101931	0.644326	0.000399749	0.000153435	0.421625	95739.7	93825	90710.2	141457	146524	147009	73146.8	68647.7	41607.8
PH02Gene04807	6.65796e-07	8.82733e-07	2.70133	6.14598e-08	1.49441e-07	2.09537	475831	492689	455276	185078	172912	169081	377824	374808	351781
PH02Gene04812	0.000801628	0.00027561	0.771804	0.000191565	8.28601e-05	0.730796	79072.9	76848.5	70972.5	96900.5	94628.4	102450	67513.5	75615	71709.9
PH02Gene04813	0.000218425	9.25548e-05	2.01729	0.0158724	0.00377963	2.53684	67916.1	50821.7	66037.9	37398.2	27084.7	27113	80493.3	80686.3	71184.6
PH02Gene04815	4.15253e-06	3.70894e-06	0.646911	3.91156e-05	2.23715e-05	0.70002	199671	190000	162945	287501	276694	290042	215879	213821	168284
PH02Gene04819	0.391106	0.0676552	0.939529	0.0151556	0.00363028	1.13728	239845	236203	265137	294548	247348	246995	298185	307237	291767
PH02Gene04821	3.09061e-08	9.0826e-08	2.3745	3.03027e-08	8.94584e-08	1.91671	375792	362888	366354	160853	156086	148438	298983	308149	284860
PH02Gene04827	8.94459e-05	4.38434e-05	0.562645	1.64161e-06	1.77664e-06	0.485156	746698	701817	789654	1.26769e+06	1.35468e+06	1355573	643806	766535	519581
PH02Gene04831										34661.1	17214.8	4610.27	4311.61
PH02Gene04832	2.11792e-08	6.90847e-08	1.65437	1.21248e-09	9.05153e-09	4.72495	337646	373627	349372	212050	202369	226699	998827	1.03044e+06	999988
PH02Gene04833	0.261361	0.0471333	0.821683	0.063114	0.0129958	1.00096	134037	234606	272136	257015	280029	242794	257619	243733	279234
PH02Gene04842	0.000102953	4.9199e-05	0.406691	0.00259355	0.000766794	0.59293	36053	79060.8	44454.3	122665	158463	111229	112862	59206	60572.7
PH02Gene04847	3.738e-05	2.1574e-05	1.83946	0.0171577	0.00404961	1.29854	163536	203021	166333	95661.8	115937	78100.3	144705	116633	114849
PH02Gene04855	0.967592	0.151002	1.0142	3.1245e-05	1.86477e-05	1.21785	812845	818048	724331	815620	764896	741738	962144	913011	953014
PH02Gene04864	0.000162329	7.20196e-05	0.864948	0.0155901	0.0037237	1.04692	1.461e+06	1.31915e+06	1.36499e+06	1.57208e+06	1.62477e+06	1.59552e+06	1712674	1.71779e+06	1.58675e+06
PH02Gene04870	5.05047e-09	2.46997e-08	1.29074	1.79692e-09	1.2028e-08	1.42289	1532075	1.57742e+06	1.54732e+06	1.20904e+06	1.22506e+06	1.17378e+06	1.71073e+06	1.75421e+06	1.66868e+06
PH02Gene04872							785508	680058	681239				2.07912e+06	1.96203e+06	1.68433e+06
PH02Gene04875	3.3196e-08	9.52869e-08	0.84561	2.00251e-05	1.30186e-05	0.881316	4.12137e+06	4.02938e+06	4.0745e+06	4745442	4840987	4.87089e+06	4232502	4234682	4274281
PH02Gene04885	4.8276e-05	2.63872e-05	1.39011	1.87944e-06	1.96959e-06	1.6895	82931.4	68292.3	70025.2	45559.9	53065.2	60534.4	94693.5	93458	80748.6
PH02Gene04888	0.00044515	0.000167582	0.650932	0.0198196	0.00460492	1.19798	68101.3	53775.6	66251	96266.2	97382.3	95364.5	118210	108325	119697
PH02Gene04902	0.0726522	0.0147721	1.07962	0.000169143	7.46119e-05	0.710916	119885	125109	109396	106562	102743	118950	79219.8	72873.7	81268
PH02Gene04906	0.0565837	0.0117945	0.742845	0.647278	0.106045	0.794031	66135.2	79880	63360.7	85473.4	92468.6	103915	70699.1	77446.8	75657
PH02Gene04908	0.129456	0.0249349	0.371963				5911.81		7146.03	23292.1	20593.6	8772.19
PH02Gene04935	0.298345	0.05305	0.904149	0.796673	0.127436	0.714366	13324.5	37130.2	12819	21665.5	20026.4	28289.6	18570.8	12611.9	18809.7
PH02Gene04937	0.00224524	0.000673494	1.14048	5.82467e-06	4.84031e-06	2.15354	176391	150193	112453	117442	140989	126529	279217	291748	258062
PH02Gene04941	0.794775	0.12718	0.668809	0.199718	0.0369974	1.26435	4596.79	8287.24	7706.64	13985.9	4586.37	12214.9	17327.2	12667.8	8930.63
PH02Gene04945	0.82878	0.131986	0.966759	0.221488	0.0406037	1.5627		14372	13858	18195.8	11424.6	14180.5	19165.3	23337	25945.3
PH02Gene04966	1.36452e-07	2.69576e-07	0.609272	0.000166181	7.35055e-05	0.650326	2.08179e+06	2140588	1913557	3473695	3.23312e+06	3364124	2.15311e+06	2.17598e+06	2.2203e+06
PH02Gene04978	0.0233702	0.00532251	0.831288	4.49808e-08	1.18835e-07	0.782454	176994	255140	262074	289697	280131	265271	225239	218928	209260
PH02Gene04982	0.0635419	0.0130725	1.32254	0.0896331	0.0178852	0.949792	318900	384473	380659	294773	265994	258891	275386	264358	238761
PH02Gene04983	8.66241e-05	4.27513e-05	1.33492	0.000526522	0.000193638	0.813777	2.05403e+06	2202598	1.90125e+06	1.46811e+06	1.57419e+06	1.57063e+06	1.26915e+06	1.22855e+06	1.2562e+06
PH02Gene04989	1.48725e-07	2.86187e-07	0.776358	0.0535852	0.0112509	0.979446	1.52156e+06	1.53622e+06	1.49547e+06	1.92321e+06	1.96316e+06	1.97851e+06	1.95305e+06	1.91824e+06	1.87305e+06
PH02Gene04990	6.37269e-07	8.53203e-07	45.4248	1.81377e-12	1.64868e-10	40.582	279105	290957	298504	1203.25	13035.7	4881.98	267475	253078	255414
PH02Gene04993	0.00346947	0.000986493	1.61373	0.370703	0.064496	0.719879	62659.5	72336.9	66078.8	54240.2	43388.7	26973.6	28376.1	42035.8	19286.8
PH02Gene04999	0.00125286	0.000406029	1.25701	7.37032e-06	5.83324e-06	1.52518	163494	182127	196807	141015	147340	143167	210624	229087	218438
PH02Gene05005	0.00601614	0.00159822	0.586705	8.71836e-05	4.29457e-05	0.337989	239302	256109	262486	400045	460022	431718	142355	146144	148110
PH02Gene05007	0.012599	0.00308111	1.02737	0.00943701	0.00238502	1.35821	251441	229239	237571	232412	232838	233871	314794	298781	335973
PH02Gene05009	0.000521887	0.000192231	0.78202	0.00187854	0.000576507	1.3333	310077	334950	275834	355268	398593	423681	427710	555448	586865
PH02Gene05015	0.000855852	0.000291584	0.959752	0.00269746	0.000793443	0.640139	217455	402022	162005	330716	254677	228862	211777	166704	142755
PH02Gene05021							3764.26	5509.97					30773.6	15052.6	28687
PH02Gene05032	0.00120104	0.000391461	2.59792	1.06207e-05	7.81624e-06	1.66967	777275	801405	831164	304238	319162	304205	524514	529206	495076
PH02Gene05042	0.00836389	0.0021437	1.35398	0.474489	0.0803368	1.00455	55211	57144	69613.1	46137.4	44979.4	43278.6	53096.9	40358.9	41551.5
PH02Gene05043	0.0497872	0.0105174	1.11476	0.0182059	0.00427019	0.745864	85996.7	79015.5	88983.2	94549.8	68851.3	64446.3	54616.3	70034.9	45292
PH02Gene05044	2.80324e-05	1.70844e-05	0.863154	0.0156769	0.00374063	1.06506	821301	771957	822994	920602	955498	923230	983028	1.02436e+06	974049
PH02Gene05045	0.00131916	0.000423694	0.999085	2.14132e-06	2.17318e-06	6.80001	35661.7	30508.3	32273.7	23908.7	18258.9	56366.3	243595	196887	229549
PH02Gene05049	0.228668	0.0417399	1.01511	0.00690909	0.00180747	0.597889	2.20981e+06	841172	997695	1.34867e+06	1.44499e+06	1.19476e+06	547811	753709	1.08311e+06
PH02Gene05057	2.78918e-05	1.70187e-05	2.80634	0.062685	0.0129188	1.17232	560471	502055	586049	204823	176724	205900	226007	247434	215237
PH02Gene05058	0.000131219	6.03476e-05	11.3147	1.07644e-07	2.25191e-07	3.39578	281903	252407	255217	12550.6	28697.5	28530.5	92273.2	76899.7	67779.8
PH02Gene05059	0.0137602	0.00333209	1.46588	0.0562276	0.0117269	0.675958	111194	57030.9	73857.3	55755.2	72400.6	36988.1	39494.1	44804.9	27331.4
PH02Gene05060	3.20617e-08	9.33753e-08	9.54533	7.82568e-10	6.784e-09	8.57971	4198067	4.08413e+06	3.97662e+06	473579	421174	389520	3531466	3.78463e+06	3.70259e+06
PH02Gene05062	0.0195629	0.00455301	1.16307	0.0513907	0.0108288	1.21228	20564.6	19284.6	21805.9	15738.4	18967.9	18304.4	19468.5	23562.1	21233
PH02Gene05066	1.77348e-05	1.17748e-05	1.1246	1.08294e-09	8.45476e-09	1.53649	398294	370156	408312	360913	346995	338473	551926	525640	530192
PH02Gene05067							703534	342613	625935	497662					688980
PH02Gene05069	0.0101125	0.0025367	0.983379	0.000436983	0.000165183	0.766057	236612	237939	234690	238793	236778	245657	179194	189076	184233
PH02Gene05073	0.0232069	0.00529322	0.649153	0.0060415	0.00160414	0.559931	66756.3	72869.7	84354.5	119862	123478	101695	67815.7	51402.5	73977.4
PH02Gene05074	0.0330353	0.00725411	0.981029	5.56593e-06	4.66587e-06	0.865889	936698	964676	971502	967688	990124	970620	827422	868024	840250
PH02Gene05078	0.0183518	0.0043005	0.77691	0.00192947	0.000589832	0.727754	140634	148654	135570	188439	173568	184850	128691	133728	135558
PH02Gene05083	0.168711	0.0316998	0.958126	0.316769	0.055969	0.818051	98441.8	91643.9	77908.5	103007	88313.4	88386	92170	65234.7	71409.7
PH02Gene05084	0.212683	0.0391447	0.555338	0.0210348	0.00485159	0.188929	50561.3	52233.6	58917.5	143024	110099	38074	11437.9	10488	33089.7
PH02Gene05085	0.000228846	9.62625e-05	3.38773	0.000117403	5.49195e-05	3.95784	46227.2	30178.1	17870.5	11526.5		7025.9	35572	25874.6	48694.8
PH02Gene05086	0.000683012	0.000240148	1.07899	7.49768e-08	1.72321e-07	0.645834	2.09685e+06	2.06565e+06	2.15686e+06	1899218	2.02528e+06	1.93224e+06	1.32251e+06	1.20133e+06	1.25864e+06
PH02Gene05087	0.363275	0.0633313	0.903401	0.000341752	0.000134521	0.167403	110652	115950	111779	116736	139930	117897	29617.1	24320.9	8765.3
PH02Gene05088	0.00213561	0.000645012	0.649779	0.0485786	0.0102814	0.674743	74652.7	76561	68827.4	111129	108597	118914	71016.9	87120.1	70357.9
PH02Gene05089	0.213001	0.0391948	0.96493	0.00327124	0.00093743	0.944224	40003.4	39855.3	47226.2	42108.7	44835.2	44759.8	42833	41009.5	40515.4
PH02Gene05090	0.000111399	5.24993e-05	8.26031	0.000670409	0.000236483	7.83524	367035	254093	263998	43107.5	25566.9	38479.6	291994	365608	181975
PH02Gene05091	0.0719736	0.0146468	1.22908	0.892911	0.140729	1.33294	20600.9	17529.6	14256.2	15448.7	13155.3	14018.8	18638.8	19884.4	18290.7
PH02Gene05096	0.226964	0.0414611	2.29976	0.0484981	0.0102668	4.30269	22138.2		33949.2	12299.2	12089.1		46969.3	70440.4	39993.3
PH02Gene05099	0.000527841	0.000194038	0.710131	0.000832136	0.000284551	0.611879	972154	1.02592e+06	909697	1352225	1.36349e+06	1378982	797214	870287	837954
PH02Gene05103	0.000206505	8.81958e-05	0.771678	0.000453548	0.000170179	0.916135	290612	293062	295216	396014	366205	376715	362297	338091	343029
PH02Gene05106	3.13672e-08	9.18687e-08	1.6508	3.15767e-07	4.99065e-07	1.37102	1.26239e+06	1.25242e+06	1.27713e+06	783620	768408	745008	1.05059e+06	1.02994e+06	1.06876e+06
PH02Gene05107	0.103982	0.0204399	1.05741	0.00655859	0.00172412	1.48243	24848	30929.4	28245.5	25964.8	25887	27609.6	41053.6	36749.2	39993.1
PH02Gene05112	1.19077e-05	8.54506e-06	0.767227	0.000686748	0.000241135	0.873954	676043	745731	711585	935362	936093	909156	813705	800822	815598
PH02Gene05119	0.0726655	0.0147736	0.978867	5.85408e-05	3.09985e-05	1.92878	272320	285185	259683	250336	272435	312059	570970	580356	458879
PH02Gene05121	0.000124511	5.77253e-05	1.85918	4.34999e-06	3.84032e-06	2.09618	125926	150474	137825	73168.6	76684.4	72946.8	162399	155065	149564
PH02Gene05123	2.91243e-05	1.75837e-05	2.08234	1.16144e-08	4.56234e-08	1.6348	1.50068e+06	1.24215e+06	1.32057e+06	639588	679643	632128	1.04013e+06	1.04285e+06	1.1071e+06
PH02Gene05124	0.230639	0.0420701	1.01357	0.00255209	0.000755743	1.35386	111771	110083	117788	108254	110602	116237	156418	150684	146567
PH02Gene05125									3072.17	11173.1	13611.3	10119.9
PH02Gene05131	4.3292e-06	3.82587e-06	2.2916	9.63644e-06	7.2378e-06	3.08433	143260	106261	129542	49622.7	61494	54297	187951	161239	161000
PH02Gene05132	0.0262059	0.00589035	1.07647	3.01601e-05	1.80793e-05	0.634585	176457	176469	186985	177653	149543	174360	119049	101716	97515.3
PH02Gene05134	9.54818e-05	4.62769e-05	3.47679	3.88355e-06	3.51472e-06	4.4757	188910	178458	175102	56300.1	52468.4	47257.9	247913	225529	224884
PH02Gene05136	4.15955e-05	2.34637e-05	2.79404	9.01198e-09	3.74945e-08	1.95636	2.07836e+06	2384207	2.452e+06	814333	812255	848166	1.58519e+06	1.66199e+06	1.59433e+06
PH02Gene05151	0.00119272	0.000389019	1.42792	0.000127901	5.9063e-05	1.65509	63159.1	99341.1	92951.4	59968.1	56710.4	62219	104851	95417.2	95823.4
PH02Gene05152	0.805929	0.12875	0.519484	0.301577	0.0535662	0.100065	58255.9	42791.8	51663.6	143197		52781.4	9679.57		9931
PH02Gene05158	0.000129659	5.96968e-05	1.16375	0.00193707	0.000591598	1.37582	31396.6	39364.5	37462.9	27752.2	31887.1	33356.4	35332.5	49406.9	43205.8
PH02Gene05161	0.00777659	0.00201046	0.473348	0.00227586	0.000682127	0.150527	49729.4	53433.4	51670.7	107530	100105	119469	17895.1		14930.1
PH02Gene05165	0.00292862	0.000851197	1.18886	1.85105e-05	1.22112e-05	1.45025	391466	382717	369033	327031	319459	315121	418125	491536	484916
PH02Gene05169	0.0310485	0.00685616	1.19895	0.000938295	0.000316068	2.1877	678188	685959	778212	628587	603002	555276	1.32426e+06	1.33548e+06	1.24939e+06
PH02Gene05179	0.0102502	0.00256652	1.87298	0.198882	0.0368636	1.03236	466566	219871	364118	233528	147215	180157	273699	200633	104721
PH02Gene05186	0.0540252	0.0113341	1.01841	1.22587e-06	1.40856e-06	0.422898	356492	315647	335777	344719	319095	325885	145436	135195	137911
PH02Gene05187	0.60778	0.100259	0.858093	1.1388e-08	4.49965e-08	0.149534	1.00029e+06	419621	835941	799829	923914	905168	94502.2	93089	205520
PH02Gene05191	0.209274	0.038567	1.09159	0.49494	0.0834832	1.28701	75780.8	84826.9	83600.7	69499	82200.1	72018.6	97562.8	87732.8	102632
PH02Gene05193	4.657e-05	2.56295e-05	0.734729	2.75437e-06	2.66045e-06	0.569229	1.87684e+06	1.69574e+06	1767677	2.50829e+06	2.47961e+06	2.28042e+06	1.45393e+06	1.40315e+06	1.28025e+06
PH02Gene05199	1.95331e-05	1.27724e-05	1.88676	7.37618e-09	3.25708e-08	2.98499	1.02693e+06	1.09723e+06	1.05913e+06	575424	563895	547855	1.64218e+06	1.67756e+06	1.71646e+06
PH02Gene05215	0.627015	0.103143	0.930921	0.0733133	0.0148971	0.823649	41005.9	51366.6		46842	53335.6	48663	42688.2	35245.4	44658.8
PH02Gene05217mRNA]	7.39805e-05	3.75406e-05	1.43172	0.000101822	4.87663e-05	1.64954	496136	553607	489761	367854	373652	333778	601423	594364	577938
PH02Gene05222	0.000620516	0.000221662	1.19316	0.000152625	6.85743e-05	1.23128	317762	288080	352933	258930	261760	282872	348268	344031	297109
PH02Gene05232	0.0332874	0.00730575	0.863953	0.0462348	0.00982783	1.4441	51846.3	44600.8	48462.6	57534.5	47924	62270.1	83289.4	76430.4	82496.3
PH02Gene05238	0.000593321	0.000213596	0.746396	0.216329	0.0397452	0.860608	159194	184552	164378	250089	212066	218615	210509	193990	181377
PH02Gene05243	1.82651e-12	1.64868e-10	0.111028	5.33534e-13	7.27853e-11	0.0147117	54137.2	62243.5	60592.6	536301	528487	529162	8797.54	9692.33	4959.85
PH02Gene05246	0.167995	0.0315813	0.933641	0.00844556	0.00216169	1.10508	123471	128888	119426	128526	132839	136845	148749	149341	141962
PH02Gene05247	5.46521e-11	1.21075e-09	3.9089	2.90713e-09	1.62398e-08	2.74852	1.04194e+06	1.06696e+06	1.02507e+06	269893	272575	259284	738461	757045	708126
PH02Gene05249	0.197633	0.0366479	0.764908	0.000110351	5.20905e-05	1.4883	317602	270569	263300	328999	443017	341153	529566	538539	588623
PH02Gene05250	0.0180326	0.0042349	0.452477	0.00017824	7.79217e-05	0.187118	373150	198521	166923	659609	482952	489775	153276	49355.9	102807
PH02Gene05251	7.24571e-05	3.69121e-05	0.953781	0.000382249	0.000147791	0.941036	5566092	5513337	5.59883e+06	5.82149e+06	5.78417e+06	5880806	5382987	5553806	5.5186e+06
PH02Gene05254	0.00365914	0.00103373	1.04492	0.0171353	0.00404543	1.22902	617486	578394	654109	568276	640271	561913	736526	744925	694485
PH02Gene05264	0.218176	0.0400589	0.955984	9.4702e-05	4.5979e-05	1.75393	83989.6	111614	113092	67551.1	122076	133281	199425	205066	161869
PH02Gene05272	0.381387	0.0661417	0.109615	0.449018	0.0764537	0.125769	17210.5	6005.96	30299	95979.8	384320	7912.31	21747.9	20730.4	18923.7
PH02Gene05275	0.000534266	0.00019594	4.44939	6.03236e-05	3.17609e-05	6.45222	31444.6	125931	69448.5	25533.4	14599.3	10846	111554	106755	110617
PH02Gene05279	0.319894	0.0564558	0.970491	0.752627	0.121229	0.94749	102062	85281	73898.2	87986.7	102695	78502.8	91792.7	82757.3	80499.7
PH02Gene05285	2.73485e-08	8.32012e-08	0.594953	3.42418e-06	3.18688e-06	0.556801	437977	437381	478632	748090	765410	762295	429271	421362	416531
PH02Gene05292							7912.88	13407.7	10899.9		178429			20169.3	20175.2
PH02Gene05296	0.00678428	0.00177768	0.947234	8.79782e-05	4.32795e-05	0.782515	447326	423456	467637	468697	473600	470678	376377	361668	367630
PH02Gene05298	1.40806e-06	1.56909e-06	3.88002	1.86865e-07	3.36735e-07	5.42822	808539	671472	698179	185703	190555	185129	1.05544e+06	999225	992668
PH02Gene05300	0.469852	0.0796244	1.02918	0.0156721	0.00373983	0.989355	327517	353828	367838	327782	343438	348218	356769	301793	350023
PH02Gene05313	6.86288e-05	3.53018e-05	0.805601	3.83179e-09	2.02281e-08	0.698575	3.51861e+06	3590927	3125695	4360906	4.19173e+06	4.15245e+06	2.89166e+06	2.92552e+06	3.05828e+06
PH02Gene05324	0.00746142	0.00193458	0.774217	0.00513085	0.00139093	0.452951	1.34613e+06	813801	1.05601e+06	1.4644e+06	1.51094e+06	1178452	533572	573305	774590
PH02Gene05325	0.0104657	0.00261364	0.680042	0.0445553	0.00950826	0.553467	34332.9	20752.1	20486.4	30622.4	43100.4	37404.8	22068.4	15752.8	23684.3
PH02Gene05333	0.756011	0.121705	0.8038	0.273227	0.0490344	0.357924	20183.3	12955.7	11618	12872.5	20615.1	22194.1	4654.59	7074.89	8200.31
PH02Gene05341	0.00232646	0.000695684	1.36296	2.6773e-10	3.20414e-09	1.73149	429998	450800	438196	311994	328196	327553	558058	569992	547587
PH02Gene05342	0.00269822	0.000793577	1.21378	0.00392377	0.00109842	1.25168	112232	100458	102902	88307.5	71279.9	100420	103624	119943	101878
PH02Gene05344	0.564837	0.0939402	0.705451	0.988833	0.153799	1.00535	76477.2	33978.4	6880.51	55149.2	83687.6	27490.9	34229.9	60372	72615.7
PH02Gene05348	0.385366	0.0667426	0.432626	0.582979	0.0966042	1.3633		19393.6	13852.7	23040.6		53807.1		45149.7	59617.1
PH02Gene05352							16658.4	52910	44507.9				139997	123359	133494
PH02Gene05356	0.0427871	0.00916184	0.825073	0.0518832	0.0109219	0.780676	13702.6	20097.2	32910.3	36126.7	25697.5	19029.3	17006.8	21552.7	24560.9
PH02Gene05362	2.97149e-10	3.44184e-09	0.662283	2.22153e-05	1.4141e-05	0.932901	4.1408e+06	4.04987e+06	4124573	6.12038e+06	6.29941e+06	6175333	5650804	5799352	5.89726e+06
PH02Gene05373	0.00074483	0.000258481	0.303418	0.0327408	0.00719493	0.217051	6210.7	3293.59	11729.7	17813.3	29517.6	22651.8		5179.06	4947.49
PH02Gene05375	0.0813668	0.0163668	1.40889	0.00754282	0.00195451	1.61506	99562.9	102624	95402.1	61017.9	66532.5	83671.6	112244	119894	108998
PH02Gene05379	0.0251519	0.00568136	0.847298	0.000321304	0.000127969	0.807663	175120	172886	189191	200161	206394	227457	165571	179747	166750
PH02Gene05388								34435.5					95503.8	93527.7	96135.6
PH02Gene05398	0.00196815	0.000599816	1.54203	0.267457	0.0481222	1.46213	32973.2	29845.6	31392.4	17137.7	21329	22628.8	28319.4	36690.2	24320.2
PH02Gene05399	0.00814837	0.00209467	1.52338	1.05442e-05	7.77317e-06	1.75659	72379.3	67158.6	72830.4	45664.3	48410.4	45331.2	77894.4	76939	90045.8
PH02Gene05404	0.140178	0.026763	3.48841	0.0233602	0.00532117	1.99118	409298	272231	1.69171e+06	208273	185503	286545	763433	318185	273022
PH02Gene05411	0.16614	0.0312712	0.420306	0.00415035	0.00115383	0.349961	124539	108492	17302.8	199631	213154	182814	48958.3	73441.3	86036.9
PH02Gene05420	0.000128946	5.94394e-05	0.689728	2.91299e-05	1.75837e-05	0.490806	461794	436862	414874	646304	626642	631471	332722	319833	282143
PH02Gene05430	0.00013518	6.18881e-05	0.782408	3.49216e-05	2.04142e-05	0.579734	555499	568113	563315	720627	717077	718365	414616	432428	402902
PH02Gene05431	2.39878e-10	2.97495e-09	0.775656	1.06762e-12	1.10691e-10	0.364666	11717449	11493722	11459136	14940181	14698815	15059044	5.592e+06	5.32097e+06	5.38687e+06
PH02Gene05436	0.664285	0.108612	0.87041	0.580314	0.0962117	1.19619	4525.87	6752.53	5771.39	3703.05	6588.06	9297.12	9081.79	3853.26	10496.3
PH02Gene05437	4.65184e-08	1.21671e-07	5.59084	2.84638e-05	1.72742e-05	6.71213	464116	435692	452363	75653.9	80174	86026.5	545138	538551	539669
PH02Gene05440	0.0325066	0.00714648	0.837189	0.000862672	0.000293599	0.655417	605690	635555	633831	717436	766938	755356	489654	465939	512363
PH02Gene05448	0.283993	0.0507557	0.490101	0.298116	0.0530129	0.52021	12229.3	6947.55	2495.43	7876.54	11650.4	24693.1		8987.38	6348.4
PH02Gene05454							9009.15
PH02Gene05455	1.10024e-05	8.0111e-06	0.551248	5.80329e-07	7.94619e-07	0.217234	2.61342e+06	2.68675e+06	2.65208e+06	4.65183e+06	4841464	4932620	1.04392e+06	1.04612e+06	1.04376e+06
PH02Gene05461	0.000178535	7.80242e-05	0.61437	0.0478113	0.010133	0.80436	294557	306495	270912	492728	519277	407276	389837	423013	328762
PH02Gene05464	0.0969631	0.019203	1.30366	0.0201503	0.00467128	1.24611	12779.8	14799.4	14072	11077.7	10400.9	10470.8	11386.1	14217.1	14209.3
PH02Gene05466	0.100279	0.0197901	1.01911	0.410217	0.0705796	1.69278	121798	132334	104947	108979	113163	130202	198719	189154	208568
PH02Gene05468	7.31097e-05	3.71733e-05	0.742803	5.70333e-07	7.85078e-07	0.334087	6963807	7205273	7.10019e+06	9752903	9628975	9251921	3.21007e+06	3.20839e+06	3.14773e+06
PH02Gene05471	7.77779e-07	9.98912e-07	2.24885	0.0995194	0.0196552	0.942664	331983	293347	342137	129566	146570	154069	142307	126930	136302
PH02Gene05473	0.188944	0.0351649	0.776107	0.118579	0.023023	1.08565	9785.58	10707.4	14825.3	14322.7	18059.7	13124.5	18048.1	17087.5	14268.9
PH02Gene05482	2.64355e-06	2.57694e-06	4.98105	1.7849e-06	1.89687e-06	2.91255	1.06365e+06	1.04097e+06	1.02969e+06	211766	201801	215678	619940	600961	611807
PH02Gene05484	0.61519	0.101397	0.970465	0.0196586	0.00457284	1.00375	67439.2	62464.9	72172	76056.2	73223.4	58946.5	71777.7	53964.6	83265.6
PH02Gene05490	0.0121365	0.00298236	0.896419	0.00149272	0.000471212	0.868901	868432	640040	637470	811696	818031	764179	796687	596198	687183
PH02Gene05491	0.00307842	0.000889947	1.10298	0.000116086	5.43622e-05	0.832903	1.89913e+06	1.89012e+06	1.88296e+06	1.66512e+06	1.81617e+06	1.66134e+06	1.36164e+06	1.4501e+06	1471569
PH02Gene05497	0.0235992	0.005369	1.17907	0.00576326	0.0015402	1.88273	48515.4	14301.3	41440.5	37608.5	21340.4		47923.4	71541.9	47012.3
PH02Gene05503	1.56321e-07	2.97056e-07	0.696106	8.35561e-06	6.46476e-06	0.828345	1.58959e+06	1.67211e+06	1.70174e+06	2340841	2.40644e+06	2383008	1.95997e+06	2.01584e+06	1.93053e+06
PH02Gene05507	0.000176139	7.71071e-05	0.629856	7.60356e-05	3.83731e-05	0.699143	117417	97898.3	115196	175574	177118	172048	108037	135284	123547
PH02Gene05516	1.52631e-09	1.07505e-08	2.3131	2.74659e-08	8.34601e-08	3.43576	146003	158201	171266	78309.5	58880.3	68365.2	257946	226980	221311
PH02Gene05538	1.19881e-06	1.38534e-06	0.795852	9.54598e-05	4.62749e-05	0.907215	1.05354e+06	1.00883e+06	1.08385e+06	1.29732e+06	1360187	1.29577e+06	1.18387e+06	1.20361e+06	1.199e+06
PH02Gene05539	4.34993e-05	2.42578e-05	1.18125	3.4313e-07	5.32557e-07	1.64454	140560	144814	154122	122272	118611	131178	203379	208423	200069
PH02Gene05540	0.982031	0.152915	0.867766	0.94844	0.148505	1.09136	16693.5	18969.1	15255.2	20039.7	17658.6	20978.6	21699.8	16332.7	26004.9
PH02Gene05561	0.35472	0.0620024	0.79687	0.00400997	0.00111894	0.874882	26578.8	37861.3		45976.5	41912.9	33410.3	34918.4	44339.8	26864.8
PH02Gene05575	0.00098371	0.000329386	0.49098	0.00254337	0.000753452	0.527435	15676.9	17166.5	50428.9	64941.9	41699.4	62962.9	37338.4	15073.5	37043.3
PH02Gene05584	9.43704e-05	4.58841e-05	0.681013	6.07341e-05	3.19511e-05	0.632663	429462	402822	420859	600834	619601	619682	385308	395500	383367
PH02Gene05586	1.33279e-07	2.64922e-07	0.43107	5.87628e-05	3.1097e-05	0.445944	257870	194762	180945	477854	510392	481532	118591	272967	263882
PH02Gene05601	0.13008	0.0250347	0.586084	0.0266262	0.00597688	0.139617	15457.5	9645.41	5984.13	13280.3	17216.8	22545	1980.32		2956.72
PH02Gene05603	0.000701616	0.000245556	2.08207	1.96241e-05	1.28157e-05	2.13935	366864	340375	357826	172117	175314	164110	328655	393121	372589
PH02Gene05610	0.010059	0.00252351	0.872737	0.000421281	0.000160182	0.882892	455349	464851	461487	533199	520412	529556	474042	463895	459828
PH02Gene05611	2.07619e-06	2.12455e-06	1.93442	0.016289	0.00386853	1.69585	444908	406523	382684	213484	206208	218284	372620	367027	342264
PH02Gene05618	1.83097e-06	1.93236e-06	0.60438	1.63922e-07	3.07665e-07	0.456048	943780	910098	853295	1.51975e+06	1.52837e+06	1.43113e+06	655205	709867	677683
PH02Gene05619	3.02161e-09	1.66285e-08	0.722856	3.57882e-07	5.48568e-07	0.799928	19774708	18828012	18727468	26369416	25913206	27028080	21123222	21504692	20814940
PH02Gene05620	0.00579429	0.00154689	0.770826	0.00288133	0.000839242	0.77254	1.28463e+06	1.32323e+06	1.40042e+06	2.02245e+06	1.49177e+06	1.68575e+06	1.33491e+06	1.2272e+06	1.45508e+06
PH02Gene05621	1.95354e-06	2.02764e-06	1.66946	0.909852	0.143164	1.0452	504607	489823	523738	308531	306255	294592	323134	324995	302354
PH02Gene05622	0.912455	0.143538	0.935492	0.0352236	0.00769486	0.715293	47326.7	61467.3	84034.1	73143.5	70529	62452.4	54560	49111.8	43767.9
PH02Gene05634	0.0514368	0.0108367	0.624955	0.00944202	0.00238558	2.14232	28533.7		26450	51247.7	43930.5	36792.3	78345.3	100403	103975
PH02Gene05636	3.11135e-05	1.85864e-05	1.82611	2.09365e-08	6.88674e-08	1.74281	295235	290636	304444	168759	162136	156653	274894	276690	298119
PH02Gene05640	0.00706748	0.00184406	2.11021	0.000280409	0.000114047	1.2847	340802	349400	348117	164624	168960	158461	199763	190495	241869
PH02Gene05641	0.0561569	0.0117169	1.00376	0.22095	0.0405108	1.06076	2.20107e+06	1.94365e+06	1.88898e+06	1.84289e+06	1.9336e+06	2.23462e+06	1.93516e+06	2.02853e+06	2.41266e+06
PH02Gene05642	1.23552e-09	9.06932e-09	9.70567	8.15571e-07	1.03379e-06	2.24997	2.11945e+06	2.19067e+06	2279770	267707	217096	194171	522069	534120	471481
PH02Gene05645	0.49898	0.0840496	7.98245	0.0802262	0.0161625	0.396666	175469	1.39058e+06	59779.1	40926.8	137954	24794.4	33951.3	31621	15218.9
PH02Gene05646	0.00810863	0.00208611	0.766179	6.63125e-05	3.43558e-05	0.456223	53684.3	49233.3	52435.6	67397.8	64400.2	70965.7	30359.1	28128.2	34018.1
PH02Gene05647	0.085366	0.0171075	0.708244	0.312188	0.0552651	1.07289	35788.3	54259.2	48259.3	61575.4	65098.5	68607.4	70713.2	77537.7	61264.6
PH02Gene05648	5.19669e-07	7.31913e-07	19.7974	1.16174e-11	4.03801e-10	7.7929	826670	865683	895322	38962.8	37493.1	54251.7	341993	322337	354263
PH02Gene05657	0.00829572	0.00212749	0.926324	0.00111579	0.00036704	1.158	4456076	4.33204e+06	4.58488e+06	4847280	4827074	4.76227e+06	5581101	5.64978e+06	5.4868e+06
PH02Gene05658	7.15317e-12	3.19038e-10	0.31687	5.72665e-09	2.69881e-08	0.173382	13087339	12185765	12287351	40394768	39276068	38864892	6.96483e+06	6835776	6.75132e+06
PH02Gene05662	0.829757	0.132125	1.03399	0.0374594	0.00813121	1.6712	112695	120621	115034	127242	128407	81250.3	192210	185827	184991
PH02Gene05664	7.57052e-05	3.82333e-05	4.11374	0.00022505	9.4866e-05	3.94968	446387	374238	385882	150746	24559.7	117981	398438	361144	398805
PH02Gene05665	0.157972	0.0298377	0.920678	1.81367e-07	3.29666e-07	0.442226	1006717	952054	1.04237e+06	1.106e+06	1.05132e+06	1102398	444572	524710	472245
PH02Gene05671	0.280976	0.0502998	0.957898	0.0601083	0.0124451	0.799623	864004	388415	568534	942630	504861	453498	537658	528050	454366
PH02Gene05676	0.368465	0.0641497	0.847917	0.0157561	0.00375711	0.919231	41607.2	49288.6	48599.1	47772.5	55879	60863.3	47171.2	44885.9	59170
PH02Gene05679	2.03807e-05	1.31902e-05	0.580218	0.000738653	0.000256716	0.80286	311074	277803	271611	472567	525355	485121	385918	405474	399284
PH02Gene05685	5.4926e-07	7.61734e-07	1.25561	4.83025e-07	6.91713e-07	1.32264	693383	710153	681509	571966	564149	524468	742199	761035	693118
PH02Gene05687	0.00193491	0.000591161	1.74299	7.3887e-05	3.75078e-05	0.387287	66652.2	73384.1	74945	37934.3	40394.4	45011.5	10103.1	22415.8	15249.2
PH02Gene05689							11536.6	5673.2	19390.1				78421.1	66509.2	84805.4
PH02Gene05691	0.00047194	0.000175681	0.726349	2.31858e-06	2.31768e-06	0.794502	378237	393823	390690	537460	547512	515842	448948	414919	407982
PH02Gene05693	0.413982	0.0711312	0.986448	0.00521704	0.00141125	0.907226	1012468	991510	1.05022e+06	1015542	1.01417e+06	1.06645e+06	929013	961712	918193
PH02Gene05696	0.00161883	0.000506132	0.920568	1.69208e-06	1.81629e-06	1.34022	277966	255825	258375	271805	306584	282130	382081	378019	393185
PH02Gene05697	0.00129771	0.00041825	1.65546	0.000430976	0.00016315	1.48663	97788.6	99890.2	125573	64619.6	57435.7	73209.4	95410.7	105738	89138.5
PH02Gene05700	0.000931512	0.000314017	0.550193	0.0507763	0.0107097	1.0615	54026.6	55048	53628.7	95472.2	96874.8	103373	100316	103166	110427
PH02Gene05712	0.396747	0.0685122	1.83441	0.332975	0.0585607	1.8662	227043	26862.2	162211	87843.3	63395.5	75600.8	202509	38159	182659
PH02Gene05714	0.37459	0.0651025	1.4699	0.0771273	0.0155866	2.09815	41584.6	54561.8	81295.8	40589	65052.2	15075.7	93294.8	57883.1	102105
PH02Gene05716														81464.9	79221
PH02Gene05717	3.63651e-08	1.0205e-07	2.10931	4.94643e-05	2.69295e-05	23.5876	158528	114322	185960	101417	60849.7	55249.1	1.75036e+06	1694963	1.68535e+06
PH02Gene05725	0.00390696	0.0010948	0.83349	0.000183577	7.99045e-05	0.544068	443559	531722	534488	591329	614119	605934	324332	322858	338324
PH02Gene05728	0.00416462	0.00115723	0.606176	0.000755596	0.000261797	0.433133	2379177	2.50386e+06	2.25533e+06	4.11134e+06	3.95861e+06	3.70613e+06	1.66649e+06	1575717	1.8584e+06
PH02Gene05730	0.0105703	0.00263611	0.726236	0.00468541	0.00128487	0.975986	115904	129505	122663	166796	178375	161650	164611	167642	162398
PH02Gene05732	4.25811e-05	2.38897e-05	0.829147	7.74673e-07	9.96008e-07	0.633019	2.03614e+06	2010034	1.92132e+06	2401887	2.40273e+06	2.39253e+06	1.53501e+06	1.51299e+06	1.50794e+06
PH02Gene05734	2.02242e-06	2.07938e-06	1.38952	1.04578e-09	8.36627e-09	2.8605	885467	846504	914193	646789	649743	607841	1.83153e+06	1.84242e+06	1.77351e+06
PH02Gene05735	0.749323	0.12081	1.69831	0.666238	0.108869	1.90379	30037.6	39464.3	34676	16768.2	21143.4	23430.5	22245.6	48246.6	46290.3
PH02Gene05739	0.000323782	0.00012862	4.11094	0.309789	0.0548839	1.741	196383	190167	213016	47725.4	50391.1	47729.9	70156.8	76397.5	107364
PH02Gene05747	0.00236154	0.000704628	28.1361	0.000222076	9.38257e-05	15.6902	473218	429285	490474	15205	18510.4	15793.2	348751	291813	136235
PH02Gene05750	0.454272	0.0772214	0.212464	0.469511	0.0795772	1.93953	20058	22014.6	34211.8	324326	18577.2	16143	330333	38560.8	327488
PH02Gene05751	3.05049e-07	4.86577e-07	40.0459	1.4924e-06	1.64399e-06	10.4509	527840	549539	618071	7082.18	10767.2	24488.3	118719	164211	159535
PH02Gene05757	1.73399e-07	3.20641e-07	2.40191	0.000976904	0.000327149	1.22922	1.64016e+06	1.59919e+06	1.56349e+06	679508	659302	660778	815665	812599	829668
PH02Gene05758				0.476449	0.0806265	0.357318					52560.8	12690	5626.51		17688.8
PH02Gene05761	0.0450642	0.00960895	0.773371	0.0016357	0.000510565	1.04669	41796.8	36146	25984.1	43245.1	45965.9	45170.6	42902.9	47084.4	50668.5
PH02Gene05768	0.679156	0.110757	2.13123	2.3275e-05	1.4675e-05	0.317377	147266	152941	1.38021e+06	238308	282998	267168	100989	82336.1	66917.7
PH02Gene05770	0.0148593	0.00356821	0.70133	0.515757	0.0866166	1.06273	84541.9	88561.3	56676	113527	106953	107153	115955	110880	121350
PH02Gene05772	0.0922297	0.0183428	0.960777	0.297395	0.052892	0.793061	298996	40113.8	133280	195151	143422	153101	112311	94591	183026
PH02Gene05783	0.329397	0.057971	0.965997	0.000125767	5.82331e-05	1.6285	45417.1	38999.4	34930.9	47109.8	32020.2	44418.4	74657.6	61332.6	65208.5
PH02Gene05784	0.00676706	0.00177443	1.10749	0.866459	0.137102	0.843343	150613	174233	149590	144296	148261	135833	129638	111352	120290
PH02Gene05785	0.86182	0.136509	0.646715	0.552504	0.0921492	0.829134	21347.2	14226.5	26067.5	38326.7	28868.9	28118.7	23059.8	29896.4	26072.2
PH02Gene05790	7.35054e-05	3.73288e-05	1.89975	0.00850518	0.00217518	0.92976	729881	676440	692382	390356	365311	349059	342579	320401	364150
PH02Gene05793	0.132867	0.0255067	0.761645	0.136266	0.0260954	1.10414	559685	581589	627244	816464	780350	725157	933487	811403	818898
PH02Gene05794	0.000254344	0.000105028	1.75071	9.45768e-05	4.59414e-05	0.622205	984503	752412	873795	478020	534328	478879	323435	301060	303355
PH02Gene05795	0.000994882	0.000332525	1.2622	2.32056e-05	1.46455e-05	1.32755	295510	293242	293698	226206	247739	225191	328099	299478	300562
PH02Gene05798	0.351272	0.0614786	0.967202	0.000603602	0.000216635	0.762368	115357	96548	106232	101778	110252	116895	76315.3	95194.5	79252
PH02Gene05800	0.0746734	0.0151462	1.00188	1.22436e-06	1.40796e-06	0.676545	1.2938e+06	1.35356e+06	1.37152e+06	1.36197e+06	1317419	1.33195e+06	927706	903619	882525
PH02Gene05805	0.00790949	0.00204055	0.960288	0.0164113	0.00389471	1.22526	360367	355374	396674	393633	376526	388260	469917	504264	445183
PH02Gene05810	0.120339	0.0233368	1.03724	0.00023976	9.99931e-05	0.930222	2.0563e+06	1.87718e+06	1.90688e+06	1.90101e+06	1.79566e+06	1.934e+06	1.75056e+06	1.7297e+06	1757505
PH02Gene05822									235384	112651	100092	3160.2
PH02Gene05824	6.88019e-08	1.61519e-07	7.19709	9.90778e-05	4.77342e-05	3.33633	128787	116732	130651	15773.1	17702.2	18791.8	63062	79114.2	32203.8
PH02Gene05828	0.752435	0.121205	1.03117	0.42925	0.0734311	0.787918	47450.6	45108		54354.7	64199.5	16087.1	42622.6	19189.1	44274.6
PH02Gene05830	0.00977308	0.00245964	0.976792	0.00563167	0.00150767	1.33311	125467	106226	127383	133007	128738	105861	151078	172576	166407
PH02Gene05832							6596.89					21312.1		526432
PH02Gene05839	0.0997949	0.0197021	0.80373	0.00125704	0.00040718	0.576564	238090	233135	199952	284073	280680	270325	153812	179082	148581
PH02Gene05843	0.479277	0.0810468	1.35909	0.0226289	0.00517688	2.16313	18831.3	25968.7	7606.35	13446.7	12259.9		25823.3	34024.6	23562.4
PH02Gene05846	0.000207753	8.86186e-05	5.82928	0.000104514	4.98166e-05	5.7919	19646.3	18212.3	22732.4	6181.86		747.646	24823.2	21461.2	13918.1
PH02Gene05855	0.0770223	0.0155703	1.24237	0.000355067	0.000138918	1.33333	503878	447141	480231	379523	380216	392293	498836	542858	494348
PH02Gene05857	0.00880877	0.00224352	3.62227	0.000732398	0.000254884	5.89686	57235.2	62784.7	57965.3	14496.8	18030.4	16609.1	97126.8	93764.6	98859.3
PH02Gene05860	1.06807e-05	7.83591e-06	0.624778	4.05069e-10	4.26804e-09	0.457886	298800	231381	267467	443733	421653	411304	212572	190776	181230
PH02Gene05863	0.831343	0.132345	1.17164	0.564824	0.0939402	0.971671	88332.1	125433	124571	102666	79557	106547	101030	90923.2	88636.3
PH02Gene05866	5.63286e-06	4.71131e-06	0.320164	1.23897e-07	2.49916e-07	0.258824	19143	29701.5	30703.8	82845.5	81567.7	84048	22119.7	19072.7	23115.3
PH02Gene05868	0.00152418	0.000480091	2.02016	7.31276e-05	3.71733e-05	2.07795	69904.4	66289.9	63272.6	30737.2	31306.2	36694.8	75948	65908	63316.9
PH02Gene05871	0.000711794	0.000248481	0.915728	0.000108384	5.13396e-05	0.854122	2.18407e+06	2.15326e+06	2.15309e+06	2315639	2.44445e+06	2327626	1.92587e+06	2.13118e+06	1.99673e+06
PH02Gene05872	0.322598	0.0568981	2.86431				59549.2	78584.9	79852.7	36154.1		14582.2
PH02Gene05873	5.37899e-07	7.52014e-07	1.51162	1.92023e-07	3.43393e-07	0.778192	61878.4	63091.4	62762.8	48366.5	36028.9	39797.4	37029.8	34292.6	25323.4
PH02Gene05877	0.00513518	0.00139172	25.8966	0.000534398	0.000195948	22.5867	195287	269726	244946	16652.8		1623.92	193344	202548	223323
PH02Gene05878	3.66647e-06	3.3605e-06	1.67078	1.76142e-05	1.17127e-05	2.27993	345195	325833	346001	197941	201120	209654	459350	467630	460848
PH02Gene05879	3.16426e-07	4.992e-07	0.788698	1.17706e-07	2.42139e-07	0.717812	3238114	3.16531e+06	3165834	3.92673e+06	4.07686e+06	4.1294e+06	2.83317e+06	2.90072e+06	2.97531e+06
PH02Gene05882	0.284601	0.0508523	1.01212	0.0404224	0.00870296	1.1497	191635	202294	177718	213263	174439	177098	210715	206846	231789
PH02Gene05884							10024.3	865.211	5480.91		1967.81		12606.8	9306.03	12122.2
PH02Gene05892	0.00105562	0.000350074	1.229	0.0106188	0.0026473	1.12562	649175	691632	624727	518251	527453	553591	562051	599261	638886
PH02Gene05897	5.65466e-05	3.00839e-05	0.855976	5.93944e-09	2.76889e-08	0.740951	2400839	2221817	2245278	2.69669e+06	2603135	2.72368e+06	2.02865e+06	1.9125e+06	2.00387e+06
PH02Gene05899	0.727447	0.117648	0.971144	3.7134e-06	3.38949e-06	0.565377	960275	984996	1.00105e+06	1.00342e+06	1.02586e+06	1.00459e+06	579726	576440	559110
PH02Gene05901	0.00967158	0.00243599	2.50265	1.02285e-05	7.60169e-06	3.95825	200240	141814	238426	82042.3	56471.4	93432.4	309372	306293	302436
PH02Gene05907	0.00198013	0.0006029	1.13651	0.00426987	0.00118382	1.31567	69290.8	71445.5	54110.2	55484.6	60773.4	55185.1	66192.2	80935.8	78433.7
PH02Gene05911	0.00124905	0.000404944	0.629663	0.00453004	0.00124675	0.750951	80015	81166.9	87393.6	125901	129939	138936	105241	91324.6	99891.9
PH02Gene05921	0.0675234	0.013816	1.26618	0.0890673	0.0177833	0.903855	168006	118813	121552	82466.5	123146	116909	96309.6	100868	94334.9
PH02Gene05927	3.55245e-07	5.46324e-07	1.57381	0.0255256	0.00575876	1.03982	2.90544e+06	3.04194e+06	3104586	1976958	2.02881e+06	1745856	2.07581e+06	1.89586e+06	2.00897e+06
PH02Gene05928	0.414958	0.0712866	1.19586	0.303002	0.0538006	4.74059	11321.8	18917.3	17134.9		11708.4	14701.7	131917	11457	44425.1
PH02Gene05936	0.000151953	6.82958e-05	0.922573	6.04738e-06	4.97297e-06	0.741847	573284	589887	572156	627666	643697	609602	462517	468997	463873
PH02Gene05944	0.26711	0.0480631	0.897245	0.00973843	0.00245163	1.39463	27814.6	34631.2	26821.7	33991.7	33755	31744	43535.6	48839.4	46377.3
PH02Gene05953	0.00957408	0.00241538	1.44947	0.00777362	0.0020099	1.21695	385091	395615	379436	251616	269806	278966	331397	303295	339342
PH02Gene05960	0.0081328	0.00209171	2.30266	0.000703653	0.000246169	1.36183	89176.1	76752.2	57883.9	46704.4	24061.3	26431.6	50868.8	39022.4	42475.3
PH02Gene05980	0.00126138	0.000408381	0.773602	0.405663	0.0698981	0.963395	91844.2	88085.7	88142.3	120044	115071	111409	116455	104434	112951
PH02Gene05984	4.37536e-06	3.85615e-06	0.511166	0.00249536	0.000739987	0.576557	176761	220734	279304	480616	431729	411688	290530	306518	166333
PH02Gene05986	9.11614e-07	1.12117e-06	0.625854	1.19755e-05	8.57712e-06	0.61665	7124082	6.07085e+06	6298591	10098817	10439884	10608392	6.42562e+06	6363140	6.41809e+06
PH02Gene05989	0.000188133	8.16407e-05	1.25072	1.72099e-08	5.99355e-08	1.47362	185516	198318	201594	153524	162203	152345	224811	235628	229324
PH02Gene05990	0.201674	0.0373172	1.17431	0.20802	0.0383709	1.06664	205049	189777	174157	162464	160124	161937	151357	184744	180712
PH02Gene06003										12979.8	9639.97	3125.06
PH02Gene06007	0.214406	0.0394227	0.935858	0.010848	0.00269691	1.41598	48626.7	33201.8	50679.4	54359.4	50386.9	36843.6	74558.6	60743.2	65186.2
PH02Gene06010	0.00585609	0.00156194	0.569264	0.703868	0.114327	0.963606	45288.6	33779.9	42805	66548.1	82059.6	65482	61207.2	72683.6	72407.3
PH02Gene06013	0.00526232	0.00142142	1.08973	0.264878	0.0476879	1.02239	1.80802e+06	1807354	1.70434e+06	1.63003e+06	1.60357e+06	1.64807e+06	1.62544e+06	1677398	1.68815e+06
PH02Gene06022	2.20911e-06	2.22638e-06	2.02433	6.26793e-08	1.51694e-07	2.29196	423085	452476	491147	246397	217792	210953	517163	512630	517605
PH02Gene06023	0.0150414	0.0036066	1.10649	6.12893e-06	5.02728e-06	1.59288	139502	140418	114440	127493	109741	119173	181199	199020	187492
PH02Gene06024	0.000103095	4.92577e-05	2.39761	0.0185973	0.00435212	0.803021	644345	601427	599875	258262	245361	266163	262331	187757	168066
PH02Gene06027	8.54075e-07	1.06997e-06	4.97022	8.90554e-07	1.10499e-06	8.16171	157124	213201	177710	44960.5	28922.9	36380.2	289364	319570	291006
PH02Gene06031	8.17971e-06	6.35927e-06	2.10302	2.04892e-09	1.31781e-08	4.55073	171970	176908	199253	84717.1	87969	87954.5	401887	371724	412495
PH02Gene06036	8.06001e-05	4.02058e-05	16.8649	5.9739e-10	5.59398e-09	7.03717	5.35133e+06	5253163	5.39103e+06	288598	302186	357668	2.21928e+06	2.4108e+06	2.04434e+06
PH02Gene06038	0.218519	0.0401192	1.11185	0.00420933	0.00116791	1.17826	152734	49166.1	112883	84913.8	101915	96288.5	91710.7	115839	126036
PH02Gene06042	0.188759	0.035133	1.1224	0.110145	0.0215306	1.08691	229424	208074	253377	219955	206026	189553	221748	244913	202372
PH02Gene06043				0.000292654	0.000118266	3.76394				6799.55	11040.2	9646.48	42296.4	32539	28621.1
PH02Gene06044				0.167963	0.0315776	0.775137	9282.5			8881.78	7847.3	9100.94		6869.72	6478.15
PH02Gene06052	0.115706	0.0225141	0.688224	0.0306364	0.00677233	0.967148	84673.1	102734	91684.2	126071	138384	141068	131299	131541	129361
PH02Gene06059	2.46766e-06	2.43757e-06	0.395742	1.00462e-07	2.13267e-07	0.110304	200532	172295	184558	463452	508799	436203	41888.2	41652.3	71817.2
PH02Gene06060	0.224736	0.0411149	1.17419	0.0798001	0.0160879	0.757022	34365.4	40582.5	33141	30753.1	36263.6	25037.2	33536.5	22983.9	13166.5
PH02Gene06062	0.00391201	0.00109574	0.328688				36670.5	20585.9	25637.7	88068.8	93549.3	70578.7		14566.6
PH02Gene06067	0.0190878	0.00445405	0.818788	0.0705068	0.0143731	1.23332	217273	239567	221114	300254	280665	247077	352863	331074	337247
PH02Gene06070	0.00017273	7.58327e-05	1.63359	0.00109635	0.000361868	1.54166	1.78877e+06	1754310	1.95727e+06	1.10467e+06	1.18262e+06	1.07973e+06	1.75854e+06	1.74748e+06	1.68478e+06
PH02Gene06078				0.0555127	0.0116058	3.23153		22761.1		22471.1		42106.9	114337	133294	65398.4
PH02Gene06080	9.67184e-05	4.68237e-05	0.338497	1.47774e-05	1.0117e-05	0.392468	115009	134389	122899	362961	335318	401578	133701	164874	133083
PH02Gene06081	5.01669e-09	2.45808e-08	0.0972579	4.37328e-07	6.38982e-07	0.108598	24158.1	12272.7	24620.7	202052	220939	204737	23218.8	18563.5	26387.6
PH02Gene06083	3.91629e-05	2.23838e-05	0.805278	0.000481357	0.000178904	0.909694	156669	180083	156489	196910	214143	201457	192965	190083	174148
PH02Gene06085							236212	463821	493970					1.23138e+06	291542
PH02Gene06088	6.52361e-08	1.55845e-07	0.776855	6.14038e-07	8.31549e-07	1.4887	785392	794879	826790	1.04103e+06	1.00485e+06	1.0526e+06	1.54473e+06	1537579	1.5304e+06
PH02Gene06090	0.000254084	0.000104957	0.84542	1.91441e-05	1.25497e-05	0.771819	1.89957e+06	1.82132e+06	1.73602e+06	2.20446e+06	2.12011e+06	2130093	1.6884e+06	1.67746e+06	1.61598e+06
PH02Gene06094	4.95045e-06	4.26015e-06	0.764801	8.33419e-08	1.85268e-07	0.785504	441265	485504	504075	612246	626489	632136	496932	467519	505126
PH02Gene06095	4.09436e-05	2.31782e-05	1.67697	8.85952e-06	6.76602e-06	1.76026	62677.5	58431.8	74409.1	47661.7	35028.8	33899.8	71949.9	65734.1	67544.8
PH02Gene06101	0.000568315	0.000206168	0.629851	6.63172e-07	8.80155e-07	0.544682	182874	168177	169701	274605	267430	284750	147615	149984	152736
PH02Gene06103	0.00212682	0.000642581	2.01742	0.00899719	0.00228634	1.64794	193484	166181	175479	95824.4	74462.3	94975	156455	82913.7	197767
PH02Gene06106	1.08016e-05	7.89688e-06	0.581332	3.3851e-07	5.26346e-07	0.578931	264922	269197	247404	462563	424375	457429	244109	252997	281190
PH02Gene06108	2.21574e-07	3.81608e-07	0.835505	4.30215e-05	2.40417e-05	0.751236	965795	964445	995480	1.1731e+06	1.17464e+06	1.154e+06	879465	908722	842443
PH02Gene06120	0.00322416	0.000926088	0.677872	0.0209847	0.00484306	0.842666	345194	297005	353222	468121	513425	486903	399863	414263	423286
PH02Gene06127	0.0310483	0.00685616	1.09345	0.0351883	0.00768781	0.619042	11217.6	11640.2	9375.41	12485.3	8544.57	8448.62	5892.05	7708.44	4647.96
PH02Gene06130	0.870985	0.137708	0.582428				10225.9	3705.66	7331.27	17192.5	14395.3	4919.44		19472.1
PH02Gene06141	1.05561e-09	8.39351e-09	3.92898	1.07714e-06	1.27428e-06	5.33003	633154	620758	654039	160598	158384	166627	896951	809948	881412
PH02Gene06144	0.000401224	0.000153932	0.386993				34130.2	31241.2	34302.2	89876.6	85652.1	82030.6
PH02Gene06145	4.96397e-10	4.83707e-09	2.93077	1.6072e-05	1.08571e-05	1.85098	773792	799908	801591	268898	254270	287300	433738	544130	522293
PH02Gene06148								74488.7	219041		51353.3		238742	58736	202595
PH02Gene06154	2.25088e-05	1.42892e-05	2.72101	0.00169475	0.000526524	1.84083	364702	414658	487985	150149	162503	153110	289401	279880	288107
PH02Gene06165	6.2162e-05	3.25607e-05	1.60643	1.86944e-06	1.96178e-06	1.82618	3.04273e+06	3004689	3.03837e+06	1.89414e+06	1.91405e+06	1.8477e+06	3.4143e+06	3.44784e+06	3.46652e+06
PH02Gene06166	0.192171	0.0357272	1.11381	0.114926	0.0223775	0.974747	24106.4	23821.4	25621	25809.4	21340.9	18883.3	25366.8	24194.4	14804.8
PH02Gene06177	0.110952	0.0216736	1.02944	4.94938e-05	2.694e-05	1.34339	5625984	5.11976e+06	4842295	5030275	4.95982e+06	5152184	6681124	6587737	7.07318e+06
PH02Gene06184	0.200887	0.0371875	0.947449	0.0301587	0.0066796	1.48014	42053	45776	45702.3	40288	55496.6	45153	67132.4	77089	64385.6
PH02Gene06185	0.659254	0.107858	1.0174	0.000263587	0.000108226	1.42173	268140	275873	295406	267753	290099	267213	416530	396120	360368
PH02Gene06190							47788.7	60534.4					57295.7	41842.2	46085.2
PH02Gene06193	0.000348087	0.000136579	0.367219	7.6549e-05	3.85496e-05	0.223584	18215.2	23076.7	24232.3	55253.7	52003.5	71176.3	14191.6	9604.88	16098.3
PH02Gene06209	4.44902e-09	2.27453e-08	3.10783	9.21936e-09	3.80519e-08	2.99828	450663	433883	433628	140830	144477	138841	420590	448225	402894
PH02Gene06212	0.0296054	0.0065666	0.629514	1.3066e-05	9.18131e-06	0.22442	116264	132749	190421	204698	251622	241733	82331	21615.2	52710.5
PH02Gene06214	0.0928096	0.0184424	0.655555				24595.1	27157	14035.8	31164.5	35155.7	34034.3			56512.5
PH02Gene06215				0.0112935	0.00279774	3.50238			36237.6	19482.6		17823.3	65316.5		65343
PH02Gene06218	1.69433e-06	1.817e-06	2.37068	7.9488e-08	1.79893e-07	1.87041	1.13228e+06	1078418	1.0446e+06	455438	453745	463964	847325	888754	832266
PH02Gene06220	1.73243e-05	1.15512e-05	1.68398	0.000306588	0.00012292	1.27468	236659	231447	212594	152450	120463	131308	165631	175205	174418
PH02Gene06221	0.0664728	0.0136193	0.573029	0.000635532	0.000226302	0.29675	109976	114040	76742.3	197309	204268	123281	69647.4	33054.9	53049.7
PH02Gene06222	0.0438435	0.00936562	0.852014	0.243177	0.0441521	0.982482	28316.8	35598	28505	42378.8	30162.9	35930.5	38531	31599.4	36441.5
PH02Gene06224	0.000398936	0.000153169	4.56972	5.27092e-05	2.8389e-05	5.7048	355302	293604	390954	66098.4	79359.1	82097.1	438665	437962	421526
PH02Gene06225	0.52651	0.0882311	0.869019	0.000662363	0.000234158	0.696274	125779	141783	147116	162565	164225	150389	112191	108485	111572
PH02Gene06232	0.697781	0.113438	1.16655	0.419379	0.0719269	1.17189	62821.6	42331.5	47471.8	41386.5	47469.3	41978.5	42327	57011.1	53985.8
PH02Gene06246	0.170561	0.032008	0.369672	0.546976	0.0913507	1.34221		24956.7	86321.2		160986	140031	278759	268005	59280.1
PH02Gene06249										6111.7	14678.1	13077.4
PH02Gene06255	0.013836	0.00334823	0.334395				29039.4	39920.9	43840.8	150767	91246.5	95314.8
PH02Gene06257	0.718419	0.116348	1.15182	0.366984	0.0639176	0.801347	106900		60353.1	76435.2	66113.5	75262.7		68097.1	48264.7
PH02Gene06258	0.037366	0.0081123	0.960148	0.0247237	0.00559448	0.992268	507456	470001	466735	509106	508243	486787	518733	503176	470597
PH02Gene06262	0.427274	0.0731453	1.16912	0.000108096	5.12314e-05	0.807149	9854940	6237616	4.58603e+06	5.77904e+06	5661333	6246876	4383040	4.95765e+06	4.93556e+06
PH02Gene06267	0.0192502	0.00448628	0.790259	0.00396858	0.0011093	0.902806	456570	473520	443758	593175	585386	559919	538320	518227	512963
PH02Gene06271	1.62646e-05	1.09672e-05	0.744	3.58185e-06	3.30515e-06	0.610469	536277	531271	538974	737007	713852	708446	448739	431028	438422
PH02Gene06272	6.09566e-06	5.00632e-06	0.670718	5.51631e-05	2.94385e-05	0.869938	4453681	4.39857e+06	4.53699e+06	6760378	6.62342e+06	6.57874e+06	5.95072e+06	5949968	5465486
PH02Gene06280	0.00062948	0.000224414	0.666548	0.378642	0.0657273	0.783762	272754	294102	265171	401540	424060	422663	331247	357148	289946
PH02Gene06281	0.163308	0.0307829	1.159	0.0625879	0.0129008	0.908255	112085	129280	109196	92637.5	115026	94803.8	89095.6	90841.9	94780.1
PH02Gene06286	1.34444e-06	1.51578e-06	1.3604	0.00118468	0.000386836	1.24193	341675	370899	379680	265448	282961	254482	339186	324220	333730
PH02Gene06290	0.00833258	0.00213609	0.524308	0.0624424	0.0128749	0.701478	20607.4		14647.1	37711.6	39096.4	24052	25084		22083.4
PH02Gene06294	1.95967e-07	3.48148e-07	0.885595	0.00184267	0.000566908	1.14538	860517	875756	859740	967654	993040	970681	1.14139e+06	1.13379e+06	1082373
PH02Gene06295	0.413999	0.0711312	0.0905977	0.334832	0.0588556	0.100737	52155	56976.5	67168.2	32828.7	26630.9	1.8865e+06	99279.7	59522.2	37229.3
PH02Gene06318	0.0162936	0.00386891	0.833982	0.0209887	0.00484356	1.21989	130565	109304	137679	130693	176863	145150	211822	176204	164225
PH02Gene06320	0.00930769	0.00235578	1.18161	0.11719	0.0227875	1.10442	167519	166967	154963	138735	131108	144378	170531	138904	148038
PH02Gene06325	0.000371447	0.000144455	0.595617	0.696743	0.113276	0.971778	377567	369338	445309	677624	678528	645493	536330	713398	695426
PH02Gene06326	0.00963585	0.0024284	1.18674	0.0479377	0.0101573	0.884577	363932	347418	303423	336036	286728	232327	243533	256801	256059
PH02Gene06328	1.12009e-05	8.12334e-06	1.5582	1.28838e-08	4.90791e-08	2.00761	224727	239746	227074	155292	148293	140227	298223	294695	298081
PH02Gene06339	0.0395045	0.00852717	0.801597	0.0994521	0.0196449	1.41037	135563	178270	169183	161916	208126	232526	320686	320567	208591
PH02Gene06342	0.0700535	0.0142953	13.6437	0.00201685	0.000612067	6.95704	9686.8	62750.2	4611.85	2603.38		1161.44	14879.7	13954.5	10453.9
PH02Gene06343	0.103657	0.0203822	1.94789	0.247773	0.0449236	1.42728	73245.8	170200	137425	83438.6	63519.9	48572	84320.2	99489.2	95268.2
PH02Gene06349	0.0561568	0.0117169	1.24647	0.00155039	0.00048728	1.25661	51645.2	40350.7	51783.1	35964.8	42857.9	36526.2	44049.6	53018.2	47881
PH02Gene06350	0.00126515	0.000409293	0.55001	0.0611154	0.0126335	1.02623	14532.4	24467.8	29110.7	41193.9	42345.1	40296.7	42737	45719.7	38626.8
PH02Gene06356	0.000148509	6.70239e-05	1.40123	1.96007e-05	1.28069e-05	1.18363	443967	432510	438937	310250	301387	327120	350504	387044	373595
PH02Gene06359	0.014094	0.00340367	1.1443	0.000134723	6.17181e-05	1.61754	691054	559664	653723	576727	563284	524267	986121	865016	840901
PH02Gene06365	0.685354	0.11169	1.02943	0.000104607	4.98511e-05	0.737942	245837	229636	229848	229359	225465	230332	183753	166731	155122
PH02Gene06368	8.16015e-05	4.05905e-05	2.1096	0.000649758	0.000230393	1.96363	159229	224814	186207	92357.4	99400.8	78554.1	185379	168740	176673
PH02Gene06370	0.0255505	0.00576288	4.3597	0.00678152	0.00177714	1.46195	844138	842814	154395	103936	154676	163744	188187	118229	311046
PH02Gene06371	3.06025e-07	4.87833e-07	2.22387	6.3818e-06	5.18384e-06	1.36169	964524	961815	963642	422052	446748	430730	609283	576608	583669
PH02Gene06373	0.00503839	0.00136885	1.19778	0.000574889	0.000208232	1.21206	62795.8	92086.3	91268.5	70805.5	67869.2	66831.2	81218.7	85236.2	82630.7
PH02Gene06374	0.00804722	0.00207175	0.511552	0.00147121	0.0004655	0.448966	230816	254815	221972	394955	577740	410553	217803	155585	247642
PH02Gene06376	0.512992	0.0861859	0.54512	0.322372	0.0568621	0.274418	216611	97765.2	40495.8	52288.4	452826	145883	18027.6	23118.9	137499
PH02Gene06378	0.0371877	0.00808238	0.95557	0.00978662	0.00246257	1.07454	1.95326e+06	1.71843e+06	1.6766e+06	1.86927e+06	1.81234e+06	1.91535e+06	2.02524e+06	1.91844e+06	2.07048e+06
PH02Gene06379	0.0153084	0.00366182	1.0297	0.0385244	0.00834143	2.33957		29257	53746.2	42510.1	42326.8	36076.4	69495	100569	112820
PH02Gene06386													46112.6	39867.1	44318.6
PH02Gene06395	0.000289953	0.000117382	1.17446	0.000141355	6.42569e-05	1.48773	174933	155857	162148	135607	146313	137794	198611	218616	207193
PH02Gene06398	0.353723	0.0618532	1.05144	0.288548	0.0515158	0.946871	1.08955e+06	858662	936268	859491	927690	956184	893007	901829	802776
PH02Gene06400	9.60312e-06	7.21905e-06	0.663515	0.000199931	8.58694e-05	0.846166	279964	293079	283394	431823	436948	421987	364059	350707	377431
PH02Gene06401	0.0554891	0.0116018	0.984376	0.000123695	5.73921e-05	1.07425	967627	881071	952806	985310	953201	907459	1.061e+06	1.02106e+06	975207
PH02Gene06402							9547.92	17792	22246.9				6847.01		12087.7
PH02Gene06404	0.00307914	0.000890055	0.686704	0.0146395	0.00352065	0.789394	71532.9	73872	76327.7	98495.3	116441	107957	88487.6	82793.1	83609.9
PH02Gene06405				0.34552	0.0605578	1.82387		4893.35			8853.52	5698.7		9369.95	17171.4
PH02Gene06407								61341.3			6897.48		41631.5	31901.7	25441.6
PH02Gene06421	0.0169914	0.00401585	0.749109	0.054157	0.0113563	0.833469	133113	134549	172168	175992	241857	169288	192531	127537	169293
PH02Gene06424	9.38367e-09	3.85459e-08	0.56188	1.91798e-06	1.99982e-06	0.765448	687914	692975	711522	1.26667e+06	1234004	1223271	960815	952410	937264
PH02Gene06427	0.000153921	6.90365e-05	1.65676	3.49784e-05	2.0433e-05	1.62374	336168	293301	312232	189206	186615	192578	278367	328853	315715
PH02Gene06446	8.50553e-10	7.2283e-09	2.43832	6.92482e-06	5.55014e-06	1.59545	601350	635543	642287	251907	251927	266851	412309	408232	409048
PH02Gene06450	6.04319e-05	3.18114e-05	1.43569	4.55814e-08	1.19825e-07	2.15329	331241	345636	423362	252619	273852	239875	579104	544501	526560
PH02Gene06452	0.00015158	6.81638e-05	0.520067	0.0207134	0.00478854	0.741239	16470	19682	8753.32	25473.8	32524.3	28347.1	19011.8	23416.3	21574.4
PH02Gene06454							2042.7			3054.08	3919.85	2895.44
PH02Gene06458	0.355064	0.0620584	0.8634	0.533734	0.089329	1.07579	23757.3	34133.6	28757.5	27382.3	38149.1	34825.8	38547.2	36770	32646.3
PH02Gene06460	0.000184468	8.02416e-05	0.568716	0.00272764	0.000800593	0.789693	177126	207691	198818	337710	352958	335565	259028	285591	265789
PH02Gene06465	4.26052e-06	3.78454e-06	2.09922	3.05239e-06	2.89821e-06	5.16753	189914	211750	222562	100956	101051	95353.5	490641	562855	483124
PH02Gene06474	9.89243e-06	7.40416e-06	1.21871	0.000109852	5.18835e-05	0.85307	2.24623e+06	2.3914e+06	2.35937e+06	1887967	1.9505e+06	1.90285e+06	1.62026e+06	1681304	1.59619e+06
PH02Gene06478	0.364516	0.0635263	2.00297	0.0173191	0.00408397	1.60214	61967.1	63065.4	204146	58962	49276.2	56106.8	94847.4	75866.1	92591.1
PH02Gene06479	0.000327516	0.000129765	0.588068	1.16699e-08	4.56234e-08	0.365355	2.00686e+06	2.12495e+06	2.16906e+06	3.51861e+06	3.53176e+06	3.66416e+06	1.325e+06	1.30872e+06	1280890
PH02Gene06489	0.000190515	8.25225e-05	2.49126	6.40047e-05	3.33736e-05	1.28104	1130403	1.03741e+06	1.13222e+06	447800	475356	401490	541297	556562	599066
PH02Gene06497	0.149338	0.0283579	0.76568	1.2867e-06	1.46296e-06	0.49138	98737.3	108956	105510	146692	123871	138490	70306.7	73061.5	57632.1
PH02Gene06502	0.00283186	0.000826876	1.28671	0.0299113	0.00662877	0.658749	18022.2	25819	22754.7	17411.5	18547.6	15797.5	11407.8	7028.54	15658.2
PH02Gene06504							535916			46329.6		3.79787e+06		464621
PH02Gene06505	8.28857e-06	6.42079e-06	0.204447	3.34594e-05	1.97108e-05	0.541419	11549.1	15639.7		63095.9	62435.1	73949.8	30529.8	46775.9	30697.1
PH02Gene06512	0.44414	0.0757277	1.18856	0.00118752	0.000387663	1.73248	127876	130821	124274	100356	105232	116625	196898	177984	183345
PH02Gene06519	0.000346001	0.000135925	1.02497	1.0668e-05	7.83104e-06	0.745087	620400	679212	682163	671441	613190	648860	499654	481354	459611
PH02Gene06533	0.0178692	0.00420185	0.495991	0.0451099	0.00961594	0.403141	62092.5	51127	65960.6	80910.3	194036	86310.6	61059.6	40904.6	43673.3
PH02Gene06534	0.000754617	0.000261598	1.3462	8.77501e-08	1.92916e-07	2.82421	177922	169781	151278	120406	128228	122025	340537	364662	341621
PH02Gene06540	0.000595886	0.000214311	0.16887	0.00432094	0.00119631	0.236984	37792	31650.1	25580.4	189095	200415	173187	45324.9	58049.4	29975.8
PH02Gene06542	0.0892763	0.0178222	1.07959	0.162898	0.0307144	1.8758	111499	42519.2	338147	163132	171358	121392	203096	385812	266234
PH02Gene06549	0.305769	0.0542399	0.883133	0.553713	0.092333	0.934121	121431	141663	124824	144742	124221	170290	119950	156096	134270
PH02Gene06557	0.404463	0.0697094	8.13565	0.0211761	0.00488028	1.95666	1.03211e+06	230734	742842	205822	25169	15539.1	223657	57305.4	201413
PH02Gene06562	0.0281226	0.00627097	0.106815	0.000470602	0.000175259	2.0743	2691.91		2422.3	31022.1	22087.1	18709.8	39065.3	55513.3	54395.7
PH02Gene06570															55057.1
PH02Gene06573	0.000217126	9.20948e-05	1.25843	8.45756e-06	6.51665e-06	1.39886	464532	542419	546275	379598	418920	435735	580644	571166	574734
PH02Gene06574	2.88162e-05	1.74384e-05	24.6979	1.90264e-07	3.41527e-07	6.44238	1.18883e+06	701517	1.18587e+06	22717.5	23362.5	78473.4	241038	324873	236509
PH02Gene06575	0.00153765	0.000483701	0.605899	0.550772	0.0919195	1.02202	91762.4	62714.6	94252.7	139602	143733	127178	143163	108200	168188
PH02Gene06577	0.0329248	0.00723169	1.46856	0.0361534	0.00788205	1.70634	715288	737322	568943	480033	443636	452887	744595	714269	890008
PH02Gene06587	0.17196	0.0322565	0.636016	0.375282	0.0652139	0.731705	351803	212601	409043	583187	437171		254906	592292	272705
PH02Gene06590	6.48066e-08	1.54962e-07	0.530249	5.87984e-07	8.04251e-07	0.65792	244351	214627	244585	447227	459034	420593	270154	296258	306552
PH02Gene06592	0.0124673	0.00305294	5.54962	0.101798	0.0200487	2.80993	267464	155936	185131	36714.5	41207.5	31730.8	87143.1	116768	104206
PH02Gene06606	1.69269e-06	1.81629e-06	1.26098	1.09068e-05	7.95901e-06	0.797665	1.87635e+06	1.88232e+06	1.84422e+06	1.50959e+06	1.49254e+06	1.44114e+06	1.17977e+06	1.18904e+06	1.17543e+06
PH02Gene06609	0.692378	0.112672	0.818508	0.674757	0.110102	0.806259	203112	195229	173490	313453	152298		214017	163451	185806
PH02Gene06610	0.000206368	8.81693e-05	0.729826	0.00552798	0.00148328	1.13628	207446	197980	207865	281563	278708	280053	321148	325230	308463
PH02Gene06613	0.000965357	0.000323784	1.72195	1.19335e-05	8.55649e-06	1.23185	132201	134127	115743	111802	29753.2	80327.1	59710.7	82548.7	131067
PH02Gene06623	1.30287e-08	4.93719e-08	1.84577	1.44979e-07	2.8191e-07	1.38933	2.01082e+06	1968553	1.88715e+06	1.05705e+06	1.08337e+06	1.03794e+06	1.49754e+06	1.47245e+06	1.44582e+06
PH02Gene06624	0.142327	0.0271277	1.80192	0.334231	0.058758	1.40772	51415.9	55348.2	56344	28739.2	32489.2	29290.6	50302.8	46738.8	30383.6
PH02Gene06626	0.361762	0.0630929	1.02102	4.05801e-06	3.63957e-06	1.14801	537869	518094	534887	507372	530281	520447	606051	589944	592727
PH02Gene06627	8.19904e-05	4.07671e-05	1.37031	1.3395e-05	9.35926e-06	1.21633	1.51806e+06	1.5213e+06	1625890	1135830	1.15601e+06	1.11269e+06	1.36382e+06	1.4039e+06	1373306
PH02Gene06630	0.0494746	0.0104556	0.705385	1.75383e-05	1.16822e-05	0.752602	786344	793452	836615	1.15036e+06	1.17635e+06	1.09896e+06	890736	831066	856362
PH02Gene06632	0.000686256	0.000241026	0.297407	0.000556579	0.000202734	0.429633	30296.2	37406.3	58731.9	145956	128968	150198	71757	53413.7	57475.7
PH02Gene06646	0.00325033	0.000932365	1.34039	0.0187849	0.00439008	1.45176	298257	302465	315740	226477	246354	210896	339028	325488	328094
PH02Gene06652	2.99394e-05	1.79678e-05	1.13047	0.00085694	0.000291916	1.19349	1.68229e+06	1.66199e+06	1.67326e+06	1.52613e+06	1.40397e+06	1.50835e+06	1.80973e+06	1.79075e+06	1.69675e+06
PH02Gene06655	0.0238345	0.00541589	1.31291	0.000143144	6.49446e-05	2.80475	66251.1	75527.8	58905.6	58373.8	44436.7	50044	149794	130266	148659
PH02Gene06657	4.79746e-05	2.62464e-05	0.738575	6.57813e-06	5.315e-06	1.29216	763190	768381	851404	1.07614e+06	1.08831e+06	1.062e+06	1.36466e+06	1.40184e+06	1.40258e+06
PH02Gene06663	0.087674	0.0175307	1.49211	0.183682	0.0342817	3.97371	41060.6	11253.3	15993.5	12978.7	18739	14061.4		46787	74488.2
PH02Gene06666	0.00473951	0.00129765	0.864556	0.0362534	0.00790252	1.24164	206844	326305	288031	329164	310739	309925	403250	383187	392904
PH02Gene06671	0.00128067	0.000413437	0.846524	0.00178097	0.000550539	0.864963	609212	662755	716130	779208	799080	770252	656946	665029	709425
PH02Gene06675	0.352774	0.061708	1.0511	0.398723	0.0688168	1.26308	180007	181739	178724	157906	191262	165029	200461	219844	229166
PH02Gene06680	0.00117038	0.000382743	0.85641	0.0879064	0.0175745	0.885967	81292.4	80763	84675.4	103627	103439	81032.3	88561	90886.4	75798.7
PH02Gene06681	0.750967	0.121021	0.616679	0.0078478	0.00202645	1.4266	11138.4	26212.6	18481.4	23592.2	29972.6	36972.5	22749.7	47373.6	59037
PH02Gene06682										42386.3	21370.4	20439.4
PH02Gene06685	4.76e-05	2.60844e-05	1.46894	1.13924e-06	1.32894e-06	1.56702	506661	564566	544540	354745	404536	340671	546598	610695	566349
PH02Gene06686	0.0450094	0.00959823	1.54091	0.0601368	0.01245	1.7171	34778.3	30837.5	39733.5	24891.5	19332	24144.8	44320.1	35499.3	37576
PH02Gene06687				0.0686592	0.0140284	7.70219				3839.66		7189.46	60789.5	24436	42197.1
PH02Gene06688													28356.5		41847.1
PH02Gene06696	6.78939e-12	3.19038e-10	0.507164	0.0808523	0.0162719	1.06716	351267	361564	374131	712972	730055	700190	762854	758728	765569
PH02Gene06701	0.00122407	0.000397792	2.06574	4.53622e-05	2.50808e-05	5.06313	52053.6	79853.1	48510	40821.2	17404		143300	169557	129346
PH02Gene06702	0.584808	0.0968763	0.65152	0.178973	0.0334655	1.05168	53413.1	62039.7	61684.5	104645	82168.7	85070.1	101993	112366	71575.3
PH02Gene06714	1.36445e-06	1.53116e-06	2.32257	1.72888e-11	5.53814e-10	7.09625	226526	260039	314650	91338.4	136431	117201	815297	842769	789924
PH02Gene06717	0.0617522	0.0127458	2.84805				22379.2	20173.9	11967.9		5866.31	6895.87	21177
PH02Gene06719	0.000111492	5.25052e-05	1.17223	0.242307	0.0440016	1.02817	1.00458e+06	1.06941e+06	1.0389e+06	974020	842650	838857	947298	892275	890751
PH02Gene06720	2.10112e-08	6.90237e-08	0.779133	1.50248e-06	1.65298e-06	1.43243	3.66008e+06	3.73418e+06	3.81876e+06	4.87505e+06	4.70382e+06	4812800	6911099	6.71819e+06	6985829
PH02Gene06721	0.195684	0.0363282	0.781485	0.0145427	0.00350029	1.4472	307661	99849.5	310817	219667		393121	451687	493224	385334
PH02Gene06726	0.000510617	0.000188589	0.595188	0.00415578	0.00115503	0.945708	499621	96923.3	512580	693534	503938	666014	617187	549358	595767
PH02Gene06737	0.165975	0.0312446	0.098214				2246.11		14038	12132.7	116691	119880	12469.2
PH02Gene06748	0.00101532	0.000338398	1.52557	4.77196e-08	1.24061e-07	2.98444	159905	200847	229111	112970	129147	144534	407010	370966	375959
PH02Gene06749	3.23677e-05	1.9194e-05	1.67053	0.000392059	0.000150953	0.872713	4.8829e+06	4971446	4550236	2.81119e+06	2.99497e+06	2816607	2.54697e+06	2551128	2.42711e+06
PH02Gene06760				0.138674	0.0265134	0.589841		39983.5		26135.7		32538.3		16262.4	18345.9
PH02Gene06762							152592	161818	180651				127496	88794.3	114423
PH02Gene06769	0.958829	0.149825	0.790269	0.0236441	0.00537781	0.327313	3.03065	5851.38		3112.88	1354.99	6644.33	2378.57		46.2023
PH02Gene06773	0.000197491	8.49479e-05	1.1902	4.49896e-06	3.93963e-06	0.714419	1.12381e+06	1.23046e+06	1.05814e+06	905597	953348	1.00813e+06	621612	711925	714753
PH02Gene06780	0.00450022	0.00123959	2.49647	1.00923e-05	7.52566e-06	4.70666	88468.6	55602.1	21391.1	18799.9	27086.7	20391.6	95578.9	104239	112132
PH02Gene06782	0.00933789	0.00236181	1.79496	0.0146451	0.00352134	1.87309	41471.1	33597.6	46632.7	17375.6	18420	32006	43766.4	40617.8	42614.1
PH02Gene06783	0.0291141	0.00646648	1.193	2.4834e-07	4.17443e-07	0.71776	265157	254527	254326	201217	229351	218226	165212	148504	151962
PH02Gene06787	0.0138608	0.00335327	0.882672	0.00825324	0.00211848	1.94692	18877.9	22027.9	26205.5	22225.8	26263.5	27542.5	51138	49232.9	47657.2
PH02Gene06795	0.00213771	0.000645496	2.22861	0.00120689	0.000392996	6.18627	45620	52452.8	51868.9	26638	19492	21150.6	153557	128948	133711
PH02Gene06798	0.164576	0.0310037	1.13146	0.000330419	0.000130695	1.99647	59515.1	41728.6	60733.3	71118.6	41943	30095.4	106177	90199.3	89433.1
PH02Gene06801	0.000436398	0.00016501	0.382043	1.57974e-05	1.06939e-05	0.223729	139127	120570	118336	337614	351578	300310	55129.8	75477.9	90772.4
PH02Gene06802	0.0125026	0.00306099	0.884939	0.000117564	5.49648e-05	1.24457	23680272	21601898	21997306	26151702	25060532	24815050	30915102	31576672	32129330
PH02Gene06808				0.150367	0.0285282	1.57024		12655.4		11322.3	25500.3	13564.2	26984.1	23311.7	28823.4
PH02Gene06809	0.000253017	0.000104646	2.02328	0.000568198	0.000206155	6.55247	22274.5	62330.3	99717.5	8325.95	54663	28111.9	295528	160004	141404
PH02Gene06817	3.85086e-05	2.20877e-05	2.07023	4.47396e-08	1.18817e-07	2.26002	115375	118096	94503.9	45728.4	55293.3	57402.6	117729	119631	120682
PH02Gene06818	0.00137967	0.000440353	0.902567	0.0395966	0.00854289	0.493027	86506	45843	34337.4	62681.1	63273.6	58725.8	23257.7	37395.5	30399.2
PH02Gene06823	0.50713	0.0852867	1.89039	0.344174	0.0603504	1.66157	62461.3	21986.3	19896.3	14235.1	13351.2	27610.8	32385.4	37679.1	21649.3
PH02Gene06826	0.000325156	0.000129047	3.05583	0.0649492	0.0133388	1.89106	95666.5	62438.9	56466.1	8954.41	34680.6	26582.2		47940.5	40582.6
PH02Gene06830	8.69481e-07	1.08559e-06	6.36625	7.86196e-05	3.93934e-05	4.54734	303004	234525	243949	33327.6	47826.9	41598.7	178879	186578	192744
PH02Gene06835	7.83731e-09	3.39704e-08	0.609523	7.72657e-08	1.76141e-07	0.344036	402997	393049	421806	679768	653729	664542	241854	218879	226665
PH02Gene06847	0.00682597	0.00178734	0.645199	3.79579e-07	5.7235e-07	0.401233	139661	98509.6	99134.7	170721	170750	181322	72526.1	80240	56995.6
PH02Gene06848	8.65681e-09	3.62495e-08	0.591014	6.67726e-12	3.19038e-10	0.323054	20047588	18884272	19529744	32540222	32804300	33572884	11038985	10559832	10356878
PH02Gene06849	0.125824	0.0243023	0.913626	1.36299e-07	2.69478e-07	0.591283	1.91631e+06	2.16697e+06	1.83376e+06	2.18976e+06	2.23261e+06	2.05406e+06	1.3172e+06	1333281	1.17892e+06
PH02Gene06850	0.000975238	0.00032676	0.869921	7.92221e-06	6.18691e-06	0.266175	5702650	5.71519e+06	5580209	6509377	6.4812e+06	6.54917e+06	1.66456e+06	1.78987e+06	1.74655e+06
PH02Gene06853	0.00677577	0.00177635	2.27184	0.000610822	0.000218857	4.0559	35371.2	27734.8	32359	12855.6	15911.7	13253.7	78470.3	41418.1	50544.8
PH02Gene06857	1.66156e-06	1.79299e-06	0.650888	0.00113174	0.000371796	0.783949	152431	162832	146129	228504	234539	245822	206480	174386	174848
PH02Gene06858	0.00336387	0.000960683	0.811858	1.91363e-05	1.25477e-05	0.673951	3090370	2.63095e+06	2.46698e+06	3.63506e+06	3260985	3.18982e+06	2555114	2.14579e+06	2.09647e+06
PH02Gene06863	0.0313805	0.006923	0.398372	0.844875	0.134202	0.883881	39082.7	15322	53943.9	95552.1		85767	68446.8	65042	106908
PH02Gene06865	0.140657	0.0268392	0.534905				46587.3	3850.69	20240.6	72161.6	24733.9	35237.4			40007.4
PH02Gene06871	0.0131089	0.00319166	7.48247	0.00101957	0.000339593	13.582	296256	214322	257582	30346.4	15860.7	56454.1	559242	545048	290058
PH02Gene06873							2228.16		8644.61			697.634		655.705	6982.73
PH02Gene06879	0.000224912	9.48478e-05	0.813466	1.79629e-06	1.90428e-06	0.817551	653523	623607	629834	793751	774137	776357	631182	654733	630625
PH02Gene06881	1.06419e-05	7.823e-06	1.92574	0.00148747	0.000469842	1.22448	69508.1	58713	66102.5	30961.5	38524.9	31422.2	43124.2	41343.5	39093
PH02Gene06889	1.71637e-05	1.14601e-05	0.782235	1.31908e-05	9.24819e-06	0.809268	944505	895080	903013	1.16446e+06	1211363	1130286	974919	932456	930005
PH02Gene06895										14545.7		12573.2		66923.5
PH02Gene06896				0.0851422	0.0170666	0.204714				153998	149811	162270	14478.8	49129.7
PH02Gene06905	7.02802e-05	3.59373e-05	6.4663	1.05281e-06	1.25103e-06	8.35916	118283	123331	137318	19514.5	18907.6	20179	170888	167585	151382
PH02Gene06911	0.0216782	0.00498271	1.11465	4.6306e-06	4.03581e-06	0.50025	1.33871e+06	1.5647e+06	1.50968e+06	1.26676e+06	1360058	1.33234e+06	655461	627271	697834
PH02Gene06913	0.0988678	0.0195399	2.16356	0.00633119	0.00167283	2.37396	12712	16362.8	9982.4	8265.04	2224.78	7562.43	13183.7	16598	13073.6
PH02Gene06915	1.17052e-08	4.56927e-08	2.48423	3.2953e-08	9.47992e-08	1.8304	1.1243e+06	1.16759e+06	1.1928e+06	456052	471622	475052	891335	840504	835703
PH02Gene06916	1.63773e-05	1.10317e-05	0.830398	2.50237e-07	4.20088e-07	0.580564	508446	498411	481211	580287	615490	596216	348055	348223	344088
PH02Gene06923	0.00561285	0.00150341	0.61285	9.94637e-06	7.43396e-06	0.634853	289785	283873	274734	460733	456169	467436	307033	288500	283319
PH02Gene06933	0.0357254	0.00779659	0.825592	0.00027162	0.000110995	0.37969	71114.7	42365.3	75751.1	70491.1	81398.7	77316.6	16767.4	48063.4	22196.6
PH02Gene06935	0.301578	0.0535662	1.00778	0.100247	0.0197854	0.800434	80098.3	150908	181692	137123	154722	117667	107744	117972	102072
PH02Gene06944	2.52449e-05	1.56805e-05	2.71542	3.17077e-08	9.2448e-08	0.498509	5.1507e+06	5.04469e+06	5.27879e+06	1910421	1.88708e+06	1.90112e+06	960305	965313	915198
PH02Gene06945	0.231966	0.0422913	1.70098	0.162089	0.030582	1.24179	50927.8	47610.6	54618.1	27692.5	35282.2	27065.3	51394.6	24575.6	35840.8
PH02Gene06947	0.00222289	0.000667795	2.70753	0.303296	0.0538454	1.74749	27049.8	24067.7	33853.1	7493.11	12338.7	11551.3	5095.28	31465.8
PH02Gene06951	0.604382	0.099748	2.14683	0.00265159	0.000781987	1.66724	108531	24629.9	74494.5	23441.1	35174.2	38111.3	68178.3	36781.6	56306.2
PH02Gene06954	0.010332	0.00258372	4.13361	0.00861922	0.00220131	2.33091	43084.6	38880.4	38251.8	7767.71	15536.9	5778.16	26896.7	22003.6	18888.9
PH02Gene06955	1.42768e-08	5.24443e-08	2.56529	8.84327e-10	7.39412e-09	1.67871	6990188	6.65325e+06	6.68973e+06	2538803	2773572	2.61388e+06	4.31436e+06	4426047	4.56545e+06
PH02Gene06956	0.00551725	0.00148071	0.346131	0.0149498	0.00358628	0.370823	46587.6	17091.5	52561.4	94531.4	131775	109521	39205.6	48763.9	36563.1
PH02Gene06957	0.000206611	8.82266e-05	0.810469	0.0317745	0.00700276	1.06397	330974	322895	332357	404732	410897	401230	444881	431448	418369
PH02Gene06959							25814.8	36465	31075.4				69870.4	55158	49162.8
PH02Gene06963									13083.9					5455.66
PH02Gene06965	0.0819914	0.0164797	1.08279	0.00120111	0.000391461	1.15708	354463	340882	345557	310531	335058	315729	382681	381137	348504
PH02Gene06966	0.0434173	0.00928146	1.13214	0.0013342	0.000427735	1.69062	53845.6	57960	57879.8	53772.7	49289.2	46817.9	94345	87197.5	71846.9
PH02Gene06967	0.0012031	0.00039206	1.41536	2.08761e-08	6.87853e-08	2.12972	88184.1	109630	85114	58571	68610.1	72716.4	136971	144377	144377
PH02Gene06984	0.0012718	0.000411036	1.99806	3.94166e-05	2.24927e-05	3.09071	29920.1	73045.9	63995.1	28707.9	26430.1	28423.6	80706.8	88309	89249.1
PH02Gene06990	0.00148678	0.000469728	0.825386	9.20174e-05	4.49254e-05	1.2725	191986	189700	192333	235378	228111	231967	306792	300622	277553
PH02Gene07000										4200.01	3901.34	4113.67
PH02Gene07001							48039.7	29860.1	76021.3				109286	89343.8	112539
PH02Gene07011	0.00233255	0.000697021	2.56958	8.81879e-06	6.74087e-06	1.33988	2.05357e+06	2129759	1.91862e+06	739908	819671	815110	1.14217e+06	992890	1.04674e+06
PH02Gene07012	1.01492e-05	7.55954e-06	73.7851	5.36582e-09	2.55666e-08	113.41	3365555	967773	3394390	22421.4		47400.5	3.72436e+06	4184157	3.96918e+06
PH02Gene07013	0.001634	0.000510219	2.66556	0.182079	0.0340069	1.23571	117501	107467	83614.5	30145.2	41260.3	44360.8	57916.2	38652	46486.1
PH02Gene07016	0.128526	0.0247706	1.06746	0.0108434	0.00269625	1.69422	93126.3	92086.4		76537.6	96969.9		184886	146220	109834
PH02Gene07028	0.000803803	0.000276244	1.48638	4.7933e-06	4.14833e-06	2.49621	255085	232153	250697	169119	164006	163340	412330	399074	427878
PH02Gene07031	5.17312e-08	1.32106e-07	0.570283	0.395852	0.0683805	0.945144	249729	221254	246744	425094	409668	423782	400322	408862	380321
PH02Gene07036										85967.3	55855.7	74033.5
PH02Gene07041	5.27918e-08	1.33267e-07	1.30058	1.53249e-05	1.04175e-05	1.27196	490053	506857	484533	371236	380855	386973	495608	494694	458540
PH02Gene07044	0.000220638	9.32942e-05	0.628359	0.000780786	0.00026948	0.486766	25339.6	23403.9	24046	44732.1	34970.6	36138	23271.9	22032	11083.4
PH02Gene07045	0.202428	0.0374379	0.446926	0.726227	0.117465	1.07869		12870	3928.86	20740.3	13389.3	22251.7	17622.7	22922.4
PH02Gene07048	0.983517	0.153128	1.23076	0.496329	0.0836793	1.13126	155818	129822	144369	125320	129349	94715.1	155947	97378.1	141921
PH02Gene07058	0.00784723	0.00202645	0.871166	0.00257876	0.00076281	0.79795	128252	123016	154671	154867	152403	158704	114593	120449	136781
PH02Gene07059	0.00038015	0.000147221	2.35889	0.0023055	0.000690212	2.42224	87055	133104	137446	45950.3	54513.1	51135.3	106814	165429	94965.5
PH02Gene07060	0.00288545	0.000840346	2.5125	0.000190776	8.25942e-05	0.597881	86800	118835	117148	53763.6	38528.5	36178.9	35065.8	23442.9	18301.7
PH02Gene07067	0.00854611	0.00218457	3.44171	9.90759e-05	4.77342e-05	1.93963	173936	75763.5	69012.4	44264.5	16809.7	31528.6	35393.4	70561.2	73660.7
PH02Gene07074	0.022878	0.00522788	1.31024	0.00175145	0.000542449	1.85368	194344	221063	194420	171953	170053	123424	295326	263842	303588
PH02Gene07078	0.943701	0.147826	1.05667	0.149749	0.0284192	0.622332		224409	55740.8	118103	165476	114110	37589.7	105427	104477
PH02Gene07081	0.0229245	0.00523711	0.699245	0.0290668	0.00645652	1.24906	50046.3	60465.7	79539.4	87077.7	97905.9	86811.3	105194	114861	119433
PH02Gene07090	0.299476	0.0532293	1.14368	0.622454	0.102432	1.08766	196302	179730	178105	171576	161855	151092	179484	172027	175484
PH02Gene07092	0.0250942	0.00566884	1.35053	5.8311e-05	3.08958e-05	1.89788	48192.8	52044	60761.1	37649.1	42252.1	39309.8	78465.1	69715.2	78067.8
PH02Gene07098	0.365824	0.0637284	0.899807	0.359608	0.0627763	0.822703	215283	295946	251588	255389	304544	287823	234844	197582	265026
PH02Gene07100	0.222377	0.0407409	0.754804	0.126885	0.0244872	0.801361	58256.5	47519.1	70021.2	83875.9	66903.4	82124.5	67407.6	57595.8	61636.7
PH02Gene07102	0.139116	0.0265842	2.06195	1.41797e-05	9.79221e-06	4.70613	31678.5	60205.1	71398.9	28458.7	23503.2	27226.7	120729	123465	128476
PH02Gene07103	0.0264039	0.00593058	1.25257	0.000121516	5.65642e-05	1.61832	183006	162747	179651	147379	154499	117582	224588	224807	229428
PH02Gene07104	6.63836e-05	3.43789e-05	2.76772	0.00595813	0.00158574	0.834399	180691	243404	221133	73956.4	98584.2	60585.2	49125.6	77689	67705.4
PH02Gene07109	3.61684e-06	3.32914e-06	1.4788	0.000121732	5.66175e-05	0.612391	2506578	1.94512e+06	2.05723e+06	1.68745e+06	1.45837e+06	1.25568e+06	781485	963885	950068
PH02Gene07110	1.3513e-05	9.42564e-06	0.845286	0.00828834	0.00212602	1.01668	2.79513e+06	2.59621e+06	2.6322e+06	3.1539e+06	3.23989e+06	3.09831e+06	3188907	3.22079e+06	3240771
PH02Gene07111	0.000304905	0.000122377	1.34473	0.3173	0.0560514	0.883754	64137.6	72659.4	77111.9	54338.1	52453.5	52280.1	47177.2	51222.4	42180.6
PH02Gene07121							2149.27			17880.1	1506.25	5214.69	4946.28
PH02Gene07124	8.86806e-05	4.35671e-05	1.8054	4.09301e-08	1.1109e-07	3.02489	3336.21	4167.03	5228.02	2795.25	2528.61	1727.9	7481.79	6395.66	7453.35
PH02Gene07125	4.98287e-05	2.70824e-05	0.82182	0.000195115	8.41075e-05	0.832427	1428457	1.21355e+06	1.25911e+06	1.57591e+06	1.63605e+06	1.53497e+06	1.29512e+06	1.29363e+06	1.36272e+06
PH02Gene07130	0.000263932	0.000108321	2.23561	0.0430632	0.0092126	1.20854	444486	366908	409986	163559	191243	191527	231977	225707	202575
PH02Gene07131	0.093805	0.0186227	1.08912	2.38345e-05	1.4955e-05	1.73223	407618	418213	355911	357286	318613	409144	614627	623667	641252
PH02Gene07132	1.38806e-05	9.63453e-06	2.79825	0.741	0.119579	1.0644	235067	208375	208485	70918.5	81589.9	80468.7	73128.1	98199.3	76653.4
PH02Gene07146	1.84076e-06	1.93953e-06	2.37201	2.21978e-07	3.8205e-07	4.75683	144785	134745	142717	51602.2	67021.8	59387.7	261990	288969	295812
PH02Gene07150	0.424189	0.0726749	0.945539	0.0384954	0.00833643	1.21663	88223.4	86296	122812	95553.7	105941	112963	135709	111653	135215
PH02Gene07151	0.316397	0.0559186	0.804832	0.000282959	0.00011494	0.781288	110068	196681	130216	179364	173467	190094	150198	147401	126583
PH02Gene07161	0.0370312	0.00805184	0.984044	0.320892	0.0566203	0.953653	197272	181168	216518	182923	220242	201442	197378	190297	188909
PH02Gene07166	2.15717e-09	1.35713e-08	0.707688	3.40297e-06	3.17056e-06	0.721538	794365	837561	791147	1.16754e+06	1.11861e+06	1.13778e+06	825261	767957	877277
PH02Gene07172	0.0935281	0.0185723	1.07675	0.0608627	0.0125862	0.988268	74678.4	72952.8	76489.1	72408.1	67037.2	68699.4	82270.4	61732.1	61700.3
PH02Gene07174	3.29891e-05	1.95e-05	4.20979	6.1157e-05	3.21605e-05	6.85921	53984.1	48869.7	27466.4	8329.45	7594.68	15032.3	71897.9	70329.1	70110
PH02Gene07183	0.41746	0.071664	0.946129	0.00194912	0.000594858	1.38507	291258	374818	325394	363033	352882	332008	521698	496809	432939
PH02Gene07185	0.00309066	0.000892789	2.20951	0.000640592	0.000227787	2.4543	34094.9	36782.1	39057.3	16327.4	17503.7	15924.1	42812.9	40528.4	38772.7
PH02Gene07189	0.0038187	0.00107261	1.28295	0.887004	0.139925	1.01095	105574	98299.7	95913.7	89477.7	78994.5	65197.3	86291	82954.5	66983.3
PH02Gene07202	0.995801	0.154762	1.04971	0.053037	0.0111476	0.82675	90859.4	93440.9	77091.9	78372.7	85862.4	84778.1	60924	70404.5	74543.3
PH02Gene07205	5.18601e-06	4.42467e-06	0.717397	6.87111e-05	3.53161e-05	0.774305	359021	370590	364244	473816	529149	521791	385669	403520	391436
PH02Gene07220	0.296107	0.0526918	0.977239	0.0391035	0.00845199	1.10113	61395.4	74196.1	75747.3	74956.1	70656.1	70649	84336.3	85379.7	68414.9
PH02Gene07223	0.881609	0.139193	0.958077	0.000954801	0.0003208	0.478017	219413	246652	265323	246255	257625	259513	130377	113140	121398
PH02Gene07226	0.00249051	0.000738773	3.63424	0.254219	0.045983	1.44382	161512	89164.2	81820.7	20182.8	43605.4	27702.1	32619.5	70818.2	28657.5
PH02Gene07232	1.69333e-08	5.92324e-08	18.7219	1.41658e-06	1.57722e-06	13.0632	513658	549254	564152	26827.6	35232.7	24846.9	361445	390232	383604
PH02Gene07237	5.94266e-07	8.10278e-07	2.2622	0.295625	0.0526313	1.01938	277462	322978	297833	122854	134306	139917	132569	153898	118309
PH02Gene07242	0.410691	0.0706518	1.0738	1.85734e-06	1.95224e-06	1.3324	515295	484198	514254	481020	476463	452227	612709	633324	632270
PH02Gene07249	1.19247e-05	8.55256e-06	0.656495	1.64553e-05	1.10704e-05	1.27877	226562	266510	292076	392083	427047	376839	475544	513962	539868
PH02Gene07260	0.018934	0.00442334	0.552654	0.0199375	0.00462939	0.530505	13265.5	15368.7	10055.6	23802.8	22916.5	23288.2	14897.7	9268.64	12972.9
PH02Gene07268	0.000162405	7.20196e-05	1.24188	7.49827e-06	5.92727e-06	1.64478	65309.5	53841.1	55300.4	39388.5	55512.7	45572.1	76934.9	72651.4	81461.4
PH02Gene07271	0.151022	0.0286398	0.168244	0.100311	0.0197948	0.13722		11581.2	10383.1	74458.7	34936.4	86430.8	5992.11	13272	7607.21
PH02Gene07280	0.0110759	0.00274872	1.01241	2.26185e-05	1.43378e-05	1.13614	6559838	6.26436e+06	6179231	6237702	6.49178e+06	6.04104e+06	7047525	7225853	7052530
PH02Gene07283													58985.4	52497.9	64557.8
PH02Gene07294	0.0400568	0.00863284	1.04152	0.000341242	0.000134382	1.63474	89996.5	90507.6	113292	95314.4	94146.4	92623.8	134598	154658	171880
PH02Gene07300	0.00130501	0.000420042	0.103578	0.071239	0.0145073	0.645333	93.1105	2862.09		20638.5	8840.01	13318.2	14539.2	5514.79	7564.18
PH02Gene07301	0.613822	0.101191	1.34801	0.00995658	0.00249975	2.30118	10100	22175.6		14791.6	9041.98	12081.2	27133.3	23390.3	32122.7
PH02Gene07311	0.422049	0.0723273	0.859853	0.316139	0.0558806	0.790242	271957	247768	252637	333773	330784	233693	229312	257800	222723
PH02Gene07327	0.00184854	0.000568243	1.35395	0.00564561	0.00151109	1.42256	240116	240821	252891	172237	194411	175344	247420	283311	240284
PH02Gene07328	0.015948	0.00379414	0.895931	0.0723515	0.0147167	1.063	1.04432e+06	1.02615e+06	1.03761e+06	1.19125e+06	1.13755e+06	1.1403e+06	1.21778e+06	1.21992e+06	1.24994e+06
PH02Gene07340	0.00145936	0.000462146	1.57186	0.360145	0.0628532	0.611806	152978	159244	123160	132051	76122.8	68812.3	70562	52269.3	46630.3
PH02Gene07344	7.58807e-06	5.98365e-06	0.048642	2.82678e-06	2.71572e-06	0.029507	310115	351112	297111	6.51687e+06	6511018	6.67396e+06	212294	184100	184949
PH02Gene07349	0.000243889	0.000101421	2.9477	0.000259665	0.000106918	2.16766	68609.8	70878.5	67500.6	39148.2	15997.5	15074.7	49746.4	55202.6	47264.8
PH02Gene07350	5.31107e-05	2.85667e-05	2.84193	1.39307e-06	1.55572e-06	2.02827	5500024	5007455	5.48298e+06	1.94373e+06	1.94015e+06	1.74274e+06	3874368	3.88686e+06	3.65107e+06
PH02Gene07353	0.0284664	0.00633999	0.817908	0.000678604	0.000238889	0.574311	290490	303262	281917	383130	422118	265372	137039	282314	195515
PH02Gene07359	0.178375	0.0333615	1.14862	0.533003	0.0892298	0.994863	616253	638617	626206	544488	541252	551938	527319	572427	529520
PH02Gene07361	0.0704922	0.0143724	0.525666	0.0530989	0.0111597	0.732304	12415.1	4514.39	7015.43	17771.4	13725.4	14054.8	9490.74	10796	13070.9
PH02Gene07375	0.452729	0.0769945	0.993634	0.0245729	0.00556464	0.849525	286941	271950	266513	299984	304803	225907	252084	231981	221631
PH02Gene07379	0.802643	0.128272	1.00468	0.00884953	0.00225258	0.639127	71688.1	8636.44	69839.9	49639.3	52008.3	47817.6	35029.6	24383.1	36114.4
PH02Gene07385				0.375756	0.065292	1.30108	37289.4			21194.5	25257.6	18140	29403.1	25026.5	29609.6
PH02Gene07388	1.02401e-05	7.60525e-06	2.28289	3.32347e-08	9.52925e-08	3.48797	159075	145302	130489	52001	70110.1	68378.3	217797	206152	240473
PH02Gene07392	0.329945	0.0580596	1.06767	3.96649e-05	2.26059e-05	0.782136	357060	366161	344683	341665	343860	314691	243512	251683	287111
PH02Gene07404	8.88373e-05	4.36235e-05	0.793405	0.0830256	0.0166761	0.924626	287676	266412	285900	341957	358873	357881	330191	337602	311120
PH02Gene07408	0.132058	0.0253759	1.20146	0.968484	0.151114	1.33779	22801.6	23408	22172.4	20902.2	17911.4	18102.2	28991.4	19494.4	27655.8
PH02Gene07410	0.0037206	0.00104876	1.61877	0.000158947	7.08131e-05	2.20406	107838	113467	130941	73525.1	73122.2	70952.9	146670	164948	167985
PH02Gene07419	7.6139e-05	3.84178e-05	1.2916	0.333958	0.0587179	0.995299	6363071	6.81703e+06	6.24736e+06	5123607	4.88358e+06	5034233	5005701	4881183	5083825
PH02Gene07428	0.0464722	0.00987262	1.0123	0.000128735	5.93846e-05	1.14969	589404	584990	600124	578485	587908	586558	694916	665311	655123
PH02Gene07429	0.72764	0.117665	0.959432	0.00595644	0.00158545	1.09869	46295.1	77591.7	77315.4	66349.3	76975.8	66384.6	79875	80015.3	70515.9
PH02Gene07430	0.775361	0.124403	1.52056	0.463979	0.0787218	0.603044	158680	5819.12			61276.9	46906.4	10461.6	79801.7	7595.7
PH02Gene07432	0.0570657	0.0118874	0.608659	0.0534553	0.0112264	0.837282	16008.5	19165.1	35184.8	44081.9	38084.1	33429.6	30236.4	24169.1	42380.6
PH02Gene07436	1.42813e-05	9.84498e-06	0.664614	9.07943e-07	1.12064e-06	0.181519	15053955	14772898	14661305	22233564	22482754	22222026	4.10657e+06	4165683	3878310
PH02Gene07438	0.000459004	0.000171754	2.03925	0.267498	0.0481263	1.45991	799696	833554	843006	435600	376617	402079	670028	546964	555768
PH02Gene07440	6.91606e-05	3.54838e-05	0.518238	1.69933e-05	1.13639e-05	0.297734	106320	75422.9	70335.8	142478	172129	171809	53442.2	48483.4	42896.9
PH02Gene07443	0.0110866	0.00275068	2.88675	0.15265	0.0289232	2.32587	186207	155524	26256.1	21854.2	71227.8	34392.5	95867.8	110251	90370.7
PH02Gene07450	0.253484	0.0458661	1.17945	0.256082	0.0462813	1.22189	179916	167165	176514	157438	150957	135535	197940	159177	185319
PH02Gene07451	0.0113725	0.00281515	0.626409	0.0553038	0.0115696	1.33245	37171	39863.6	45585.2	63819.3	64548.4	67382.7	86973.1	93426.8	80428.6
PH02Gene07461	0.000160111	7.12217e-05	2.32811	0.113755	0.022174	1.07429	147757	161032	129679	64937.7	56790.2	66608.5	66548.6	65846.5	69932.8
PH02Gene07462	0.0126019	0.00308153	2.11057	0.000224338	9.46428e-05	3.60057	138951	81393	72238.7	63027.6	44376.4	31223.1	162669	166440	170028
PH02Gene07470	0.00136593	0.000436452	0.596327	2.83088e-09	1.59861e-08	0.496133	100097	105768	109030	182173	164119	181765	82569.3	96506	82910.7
PH02Gene07474	4.8285e-05	2.63872e-05	0.395708	0.624784	0.102782	0.829605	72203.2	72974.3	56940.8	174975	162033	173768	134752	166426	122564
PH02Gene07484				0.0922666	0.0183471	2.05061		4146.58		5188.35	5016.03	5374.55	11393.2	11993	8560.18
PH02Gene07485	2.32543e-05	1.46655e-05	0.528637	1.04091e-06	1.24048e-06	0.224749	540503	548896	471118	1050674	947230	954061	234523	195623	233305
PH02Gene07486	0.0237004	0.0053892	1.0689	0.000261014	0.000107406	0.933627	6512036	6.52295e+06	6284522	6088769	6.01224e+06	5973202	5616652	5.57797e+06	5.67995e+06
PH02Gene07490	0.854397	0.135499	0.682442	0.00631479	0.00166918	1.13784	37672.2	44911.7	37466.4	50414.7	62398.6	63099.7	73327.7	66173.4	60659
PH02Gene07493	0.163548	0.0308259	2.53033	0.482946	0.08163	1.89411	76770.9	235733	196388	13259	130959	56898.1	64424.9	260314	56198.2
PH02Gene07496	0.0683687	0.0139757	1.27553	0.0146518	0.0035223	1.21144	88290.1	132611	69283	85408	114998	27093.8	121538	76511.4	77554
PH02Gene07515	0.26346	0.0474656	0.929667	0.0704828	0.0143716	1.69903	17352.3	21591.2	14007	14211.2	27192.3	15553	30998.9	35331	30440.6
PH02Gene07518	0.434236	0.0742245	1.04644	0.0746926	0.0151489	1.34488		11853.9	17933.1	11722.7	16828.7	14146.3	24712.5	21281.2	11429.7
PH02Gene07521	0.324224	0.0571576	5.27183	0.0595883	0.0123503	26.2489	44970.6	16505.6		10585.5	3036.96	3869.44	45100.6	34203.7	379838
PH02Gene07522	1.97783e-07	3.49695e-07	0.397066	1.30671e-05	9.18131e-06	0.551956	246887	290380	273618	701353	664012	676828	390035	375520	361646
PH02Gene07524	0.227665	0.0415656	0.71346	0.0271481	0.00607981	1.69144	10042.5	11601.1	15519.2	16538.8	10308	25241.3	32286.7	25742	30075
PH02Gene07525	4.10717e-06	3.67437e-06	7.6344	2.11675e-08	6.90847e-08	5.26201	758169	819031	771973	94454.5	107545	105710	514983	547254	556930
PH02Gene07528	3.41641e-06	3.18194e-06	0.553234	0.000180632	7.87551e-05	0.78053	166632	177616	176168	320058	283463	337159	262052	253276	218901
PH02Gene07542	0.00823002	0.00211335	0.910585	0.60537	0.099893	1.05527	1.21315e+06	1.1577e+06	1.17339e+06	1.31199e+06	1.26755e+06	1.31273e+06	1.35149e+06	1.39678e+06	1.35911e+06
PH02Gene07544	0.268097	0.0482173	1.0968	1.27575e-07	2.55426e-07	1.67833	86394.1	62217.3	61947.9	63980.4	67983.7	60012.6	103924	105047	113228
PH02Gene07546	0.967003	0.150947	0.907667	0.00666351	0.00174975	0.567028		50771.1	100601	101626	93792.6	54736.3	11211.4	56024.2	74609.6
PH02Gene07547				0.382922	0.066368	1.52319		288273			13742.4	141014		131697	104027
PH02Gene07555	0.209276	0.038567	0.365378	0.00971475	0.00244638	0.297024	300601	29820.2	631779	835128	900358	897951	385100	264847	132247
PH02Gene07556	0.0233034	0.00531056	0.904761	0.000785385	0.000270707	1.52328	150747	163321	146704	179443	181046	148785	269003	249963	256802
PH02Gene07557	0.0143443	0.00345769	0.367626					8844.31	10877.7	21648.1	28858.1	29964.4
PH02Gene07558	0.400226	0.0690486	0.479195	2.97466e-05	1.78728e-05	2.14606	368476	305996	399119	658675	793491	788242	1.66375e+06	1.64437e+06	1499922
PH02Gene07569	0.019992	0.0046404	1.75597	0.00138838	0.000442646	5.35246	51011.2	47844.9	52782.6	33328.1	31955.8	21072.2	136910	166507	158800
PH02Gene07576	0.0607761	0.0125694	1.19891	0.199347	0.0369367	1.1519	66603.6	76410.4	76064.7	53583.1	73889	55259.6	71369.9	71500.7	67618.5
PH02Gene07579	0.593304	0.0981206	1.21323	0.0559663	0.0116837	0.575814	111724	73467.5	98035.9	56603.5	85633.5	91212	54813.3	25955	53655
PH02Gene07584	5.26794e-06	4.47982e-06	1.35406	0.000363602	0.00014168	0.87481	1.51061e+06	1.41323e+06	1.47251e+06	1.06935e+06	1.11263e+06	1.0648e+06	891308	977940	971069
PH02Gene07591										30894.5	24778.4	35199.9	13241.7
PH02Gene07592	0.0258454	0.00581773	1.36131	0.0911374	0.0181519	3.52999	154841	125327	189537	102612	127601	114826	775088	242036	200857
PH02Gene07593	0.000234647	9.81293e-05	4.80023	2.21434e-05	1.4116e-05	7.47544	106953	79830.8	81253.6	20587.4	19697.3	15553.6	132951	142645	141820
PH02Gene07607							104561	28055.1	36936.9	321099			18129.2	318750	404977
PH02Gene07614	0.503654	0.0847654	0.996445	2.53738e-06	2.49219e-06	1.21252	1.12816e+06	1.05245e+06	1.1e+06	1.0788e+06	1.1533e+06	1.06023e+06	1.35591e+06	1.35937e+06	1.27672e+06
PH02Gene07620	0.0229605	0.00524395	1.0018	0.0149092	0.00357754	2.03635	28686.2	33094.6	26691.3	32435.3	31416.1	24461.5	59195.5	65712.4	54927.8
PH02Gene07623	0.633436	0.104061	0.76829				16981.2		6285.75	12596.1		17687.9
PH02Gene07631	0.050034	0.0105652	1.21767	0.0029977	0.000869035	1.45486	56359.3	51811.9	38509.6	32376.5	55873.8	32210.2	40874.3	65302.8	69075.7
PH02Gene07634	0.000256715	0.000105804	4.89216	0.000226964	9.55947e-05	2.9051	157192	124426	124747	59842.9	15480	7741.54	81390.7	91609.6	68310.5
PH02Gene07636	0.000790136	0.000272091	0.903806	7.21667e-05	3.67858e-05	0.786733	1.93362e+06	1.77564e+06	1.86236e+06	2.01403e+06	2.08555e+06	2.06505e+06	1.57518e+06	1.634e+06	1.64074e+06
PH02Gene07641	0.377928	0.0656166	1.01174	5.50645e-05	2.9404e-05	0.859147	421024	390832	369439	392103	373307	402173	322379	334018	346729
PH02Gene07644	1.80647e-05	1.1957e-05	0.734147	0.00284186	0.000829424	1.12696	6.8702e+06	6761876	6634991	9132964	9437293	9036023	10274489	10342597	10494135
PH02Gene07645	1.1909e-09	8.95877e-09	0.654413	1.58524e-08	5.65531e-08	0.704975	15170813	15111888	14644288	22880088	22416748	23355496	15869842	16156833	16371532
PH02Gene07646	6.64586e-05	3.44021e-05	0.601704	2.41907e-06	2.39759e-06	0.262149	86029.8	72194.6	104080	140331	145449	150156	39413.6	37948.1	36918.7
PH02Gene07648							121962		4331.62	213120			9784.19	6904.63	56641.6
PH02Gene07655	0.611809	0.100878	0.88205	4.57035e-09	2.31374e-08	0.318415	371975	378164	356516	397065	425697	431879	124282	142168	133046
PH02Gene07656	0.00908279	0.00230493	0.482221	0.0659871	0.0135262	0.544709	30168.5	39838	47304.2	80876.1	78664	83731.4	54401.5	23736	54374.5
PH02Gene07660	0.00107091	0.000354508	1.14078	4.93417e-06	4.2532e-06	1.478	2778565	2.47133e+06	2.5075e+06	2.17374e+06	2.28794e+06	2.33842e+06	3.35576e+06	3.26788e+06	3.42693e+06
PH02Gene07664	0.00116702	0.00038179	0.90936	3.31853e-06	3.10753e-06	0.713436	628750	638387	648874	701133	708563	697294	523905	461067	518230
PH02Gene07669	0.000154551	6.92476e-05	4.98526	0.541839	0.0905568	1.3154	1.96885e+06	2.14979e+06	1.73846e+06	562237	286634	326014	813446	345956	386042
PH02Gene07678	0.00574745	0.00153613	1.24694	1.05422e-05	7.77317e-06	2.20014	62257.4	46716.3	33619.6	38873.7	45302.6	30178.3	80471.9	78202.8	92921.3
PH02Gene07679	0.000727046	0.000253293	4.23877	0.0210974	0.00486359	2.54704	16057.8	13872.1	10096.1	3695.6	2798.95	2948.29	5386.87	9475.58	9188.83
PH02Gene07687	0.0372085	0.00808624	0.834371	0.00594531	0.00158297	0.552227	49661.1	48843.2	48642.3	60717.3	60865.6	54773.4	27845.9	39290.1	30252.8
PH02Gene07693	0.0241395	0.0054756	0.901599	0.000294658	0.000118946	0.704936	95194.1	63040.2	107320	80556.4	99141	114840	75449.9	63309.4	68870.8
PH02Gene07694	2.60402e-05	1.6082e-05	0.392677	3.27942e-05	1.93937e-05	0.578368	111410	148934	120452	311245	332499	326002	170854	208431	181586
PH02Gene07696	2.99437e-07	4.80284e-07	11.1018	1.88735e-06	1.97577e-06	6.75615	716180	630770	627585	58874.1	51324.5	67658.2	372103	419685	409840
PH02Gene07711	8.46762e-08	1.87111e-07	2.50488	3.64623e-08	1.02067e-07	3.03078	119930	132992	128879	54305.8	46619.1	51498.3	159294	143750	158917
PH02Gene07714	0.295121	0.0525525	0.311829				4939.2	1015.4	1848.8	6235.32	9390.84	9398.42
PH02Gene07717	0.0056491	0.00151187	4.38627	0.986543	0.153516	1.26765	438663	560368	389552	96955	113840	105780	82215	207992	111099
PH02Gene07723	4.36796e-05	2.43322e-05	0.130885	0.000319053	0.00012717	2.22054	12829	16301.6	26673.4	146453	145141	134766	342470	340696	263581
PH02Gene07724	0.0622031	0.0128327	1.13148	5.42083e-07	7.54115e-07	1.37268	105530	94624.9	95151.4	84460.4	87210.2	89320.4	123226	114653	120379
PH02Gene07725	0.0514648	0.0108417	0.850437	0.86867	0.13741	1.1241	16177.2	16001.7	18348	19179.7	20819.6	19413.6	23066.1	21698	22022
PH02Gene07726	9.15448e-07	1.1237e-06	2.54559	0.00267358	0.00078749	4.09991	133616	102421	118406	45829.8	50575.1	42833.3	182925	198653	189285
PH02Gene07736	0.964319	0.1506	1.27055	0.428955	0.0733993	0.922177	54281	46014.4	42717.9	1840.47	71560.3	39159.8	39161	29774	34865.8
PH02Gene07739	3.24697e-05	1.92317e-05	1.86931	0.000522414	0.000192343	4.0208	95753.1	99765.5	77107.7	44305.2	50518.3	51019.6	205278	192632	188496
PH02Gene07743	0.400447	0.0690822	3.76468	0.0179523	0.00421755	3.04222	25831.7	31403.2	18276.1	10939.1	5300.49	3818.14	19851.1	19027.5	22141.3
PH02Gene07747	0.193861	0.0360254	1.13302	8.71486e-05	4.29366e-05	1.71776	95333.6	65911.3	60046.4	71669.4	63319.7	60322.6	102842	114535	118122
PH02Gene07749	0.883051	0.139378	1.05261	0.0960881	0.0190457	2.09826	10989.7	15087.6		9900.03	7945.45	19315.3	21908.6	29562.2	26502
PH02Gene07751	1.41229e-07	2.77532e-07	5.15826	9.62971e-07	1.16691e-06	3.6888	177915	217148	200411	36582.6	26717.3	52140.9	134424	158113	133301
PH02Gene07766	0.993839	0.154503	1.1146	0.0596548	0.0123621	1.07179	105247	110940	115683	108873	92104.5	96770.3	111346	96134	111642
PH02Gene07771	1.81887e-11	5.68013e-10	3.75546	0.000117801	5.50533e-05	5.3145	116075	107282	112585	33017.9	23333.3	33103.2	160351	161769	153285
PH02Gene07774	0.000396491	0.0001524	0.773777	8.28197e-08	1.84938e-07	0.38962	279266	276653	294843	350010	361818	387665	146320	151416	130649
PH02Gene07783	1.41987e-05	9.80106e-06	0.656059	9.40604e-08	2.02327e-07	0.363794	290503	343624	329434	494023	503175	471513	174213	170026	190070
PH02Gene07785	0.0465756	0.00989054	1.72872	0.0368508	0.00801993	2.29021	26451.6	21970.6	32053.9	11737.7	22440.1	12374.7	20585	37885.2	48145
PH02Gene07788	2.12946e-06	2.16284e-06	2.13727	0.000229046	9.63154e-05	1.36396	2111629	2.12158e+06	2101675	944669	1.01983e+06	999514	1.30171e+06	1.32244e+06	1.41865e+06
PH02Gene07791	0.000759096	0.000262905	0.290547	0.0191233	0.00446152	0.832022	48239.7	50513.1	40438.5	152337	173121	153607	112460	175180	110953
PH02Gene07795	2.87835e-05	1.74315e-05	2.89973	2.15977e-06	2.18591e-06	2.63669	834060	814129	829668	292631	275122	286759	748331	752696	752053
PH02Gene07796	0.000386331	0.000149063	0.505665	0.00544623	0.00146499	0.602606	44589.1	44578.5	29477.3	93327.8	75388.6	65915	52881.4	59914	28595
PH02Gene07797	6.41501e-07	8.57541e-07	1.5281	2.53767e-08	7.89633e-08	0.361907	512697	476160	492180	333471	314640	321090	123106	115064	112591
PH02Gene07802	0.0264911	0.00594863	0.832159	4.45543e-06	3.91341e-06	0.579361	144720	146665	152345	174592	180815	177820	95793.5	108855	104283
PH02Gene07806	3.46391e-08	9.83402e-08	0.459438	5.56039e-06	4.66274e-06	0.291466	391753	387583	437948	884421	885135	879949	269492	246261	256489
PH02Gene07807	3.15735e-06	2.9727e-06	1.87046	0.124194	0.0240207	1.14659	589252	502572	570178	262305	296713	329536	362251	326946	329612
PH02Gene07808							49653.6	42470.8			2062.54		39382.4	24626.2	21124.8
PH02Gene07812	7.80903e-05	3.9204e-05	1.60835	3.60611e-06	3.3228e-06	2.15728	246678	243286	261462	149020	172656	145527	336188	339575	332125
PH02Gene07816	0.000999413	0.000333781	1.00665	6.86722e-05	3.53101e-05	1.86424	28190.2	25978.4	26557.1	29861.9	26964.2	23366.1	52466.8	50209.6	46821.4
PH02Gene07820	0.42527	0.0728215	3.36075	0.0442488	0.00944675	1.42721	198166	174464	83670.2	28264.1	84097.3	23411.9	75636.3	76543.7	41597.6
PH02Gene07823	0.000456402	0.000171053	0.873227	9.04149e-06	6.87365e-06	0.675665	539961	531586	567348	635213	607698	633914	421195	422921	423989
PH02Gene07829	0.0005769	0.000208748	0.759787	0.000194823	8.40237e-05	0.505959	216137	222008	154727	253986	252056	274273	172991	89658.8	132158
PH02Gene07832	0.0427996	0.00916376	0.489151	0.0652222	0.0133853	0.237844	377505	468765	386025	777379	1058665	683210	374581	34750.1	189859
PH02Gene07835	0.0408544	0.00878794	0.86886	0.348855	0.0610885	0.769948	149052	154221	123561	140006	175610	175642	95622.4	113474	169146
PH02Gene07839	0.0659019	0.0135109	0.822109	0.370269	0.0644291	1.03305	188347	198481	165854	223256	227617	221401	226143	227415	240934
PH02Gene07844	0.683043	0.111349	0.619795	0.222688	0.0407948	0.558327	7633.36	8450.37		15541.7	8873.6	14509.8	2007.9	13174.4	6550.64
PH02Gene07846	1.49635e-05	1.02076e-05	1.50087	0.00310591	0.000896693	1.55428	78440.2	64525.7	71207.1	41029.7	57006.2	44663.8	71693.5	74849.7	75252.6
PH02Gene07855	0.00119604	0.000389956	0.720783	0.00100772	0.000336167	1.50589	301631	323863	320361	438298	432300	441663	684942	634542	656631
PH02Gene07860	0.000186117	8.08935e-05	0.801675	3.26177e-05	1.92981e-05	0.557394	264603	250000	280074	333652	334733	322887	187622	185042	179865
PH02Gene07876	0.0004671	0.000174305	13.6772	7.25054e-06	5.75249e-06	7.90654	61238.3	63128.8	62345.6	5288.3	4527.85	3835.18	33917.6	40557.2	33460
PH02Gene07882	0.0567659	0.0118306	2.24573	0.00123355	0.000400571	2.75079	114835	112604	105933	52832.7	64450.9	31163.7	145507	107442	155398
PH02Gene07901	0.000171677	7.54471e-05	1.10629	0.00134929	0.000431934	1.89528	46496.2	34142	39654.3	30818.4	42040.3	35876.6	53347	49640.1	103097
PH02Gene07905	0.000450297	0.000169155	4.15954	1.91137e-11	5.83275e-10	3.6003	611533	646377	617767	141382	161825	147726	560883	534868	527746
PH02Gene07907	0.00707288	0.00184528	1.54403	0.000221638	9.36714e-05	2.01236	55618.6	49455.2	43816.6	22820.7	27761	45847.9	59573.8	62900.1	71576.9
PH02Gene07909	0.00128473	0.000414595	1.16213	0.000322263	0.000128212	0.916205	484240	476558	523631	418732	428854	429754	392945	397279	380082
PH02Gene07919	0.787717	0.126198	0.98245	0.64703	0.106035	1.12923	80048.7	85099.7	54055.6	130307	28866.4	63946.7	190499	44250.9	17203.7
PH02Gene07930							12597.3		20092.4				195238	180894	209933
PH02Gene07933	0.00135273	0.00043287	0.728917	0.000344658	0.00013548	0.771781	234602	236054	221451	314140	321587	313773	240639	249233	242933
PH02Gene07937	1.45414e-05	9.97916e-06	2.51454	1.88126e-07	3.38392e-07	2.24042	3.83944e+06	3.86129e+06	3.94561e+06	1543414	1.56333e+06	1.52486e+06	3.52974e+06	3.44688e+06	3400106
PH02Gene07940	2.30082e-06	2.3026e-06	3.05272	2.37765e-06	2.36578e-06	2.42602	76191.6	78005.7	73967.2	27556.2	22487.9	24697.5	60000.9	58414.8	62908.8
PH02Gene07943	0.128162	0.0247023	1.05628	0.0473827	0.0100496	1.72593	33320	28518	26234.3	26516.4	25572.5	31290.5	53528.3	41575.4	48803.6
PH02Gene07946	0.00822637	0.00211263	2.06338	0.0157054	0.0037471	1.79366	88086.4	73730.2	67675.4	38643.9	39095.1	33482.4	75378.4	53372.6	70742.4
PH02Gene07959	0.00145631	0.000461294	0.41107	0.351853	0.0615678	9.08129	3164.05	29793.4		43472.9	38886.5	37902.9	3573.32		724519
PH02Gene07960	0.296019	0.0526835	0.739531	0.154064	0.029172	0.959884	88048.4	86215.3	70588.1	120082	114143	96865.9	108213	109989	99607.5
PH02Gene07981	0.227535	0.0415478	0.875809	0.122464	0.0237205	0.886317	94312.7	89237.3	95455.8	100423	116199	101946	82973	89383.1	109997
PH02Gene07990	0.0562112	0.0117261	8.11302	0.114565	0.0223138	4.4807	257554	482004	257650	34731.9	79550.9	8631.59	195916	143398	211430
PH02Gene07991	2.74076e-06	2.64989e-06	0.577933	0.0800598	0.016134	0.932509	671652	757680	723430	1236204	1.27864e+06	1.21008e+06	1.1868e+06	1.1823e+06	1.10443e+06
PH02Gene07992	1.6537e-06	1.78674e-06	0.644548	4.77971e-05	2.61813e-05	1.33523	106635	103289	87617.3	157212	160470	143946	202829	205022	208530
PH02Gene07994	0.0122129	0.00299856	0.816697	0.000730654	0.000254345	0.667454	43447.6	39336.2	36296.9	48191.3	50959.8	46656.4	29676.3	30165.4	37478.1
PH02Gene07995	5.28622e-05	2.84567e-05	0.401804	0.000101821	4.87663e-05	0.403939	76245.2	60263.2	35713	141891	150988	135742	54165.9	91808.3	27162.6
PH02Gene07996	0.00257843	0.00076281	1.75596	4.9949e-05	2.71364e-05	2.20758	167150	110911	72776.5	75750.3	82651.6	41396.3	170773	120643	149654
PH02Gene08008	0.00311033	0.000897669	2.59696	0.0179347	0.0042142	2.1128	68592.6	82251.8	69233.4	33546.2	32590.3	18607.9	58748.6	60928.7	59370.8
PH02Gene08009	0.549537	0.0917252	0.716903	0.028142	0.00627475	0.706656	53812	47780.6	39515.7	66584.1	65475.5	64770.8	48350.7	39070.4	51670.2
PH02Gene08025	1.16573e-08	4.56234e-08	0.73585	0.000209804	8.93839e-05	1.0228	722298	727843	746871	997601	1.00509e+06	982992	1.00842e+06	1.02096e+06	1024391
PH02Gene08036	0.00036141	0.00014089	0.822273	0.000613147	0.000219513	0.868933	812350	945352	869244	1.09018e+06	1.05459e+06	1049968	949281	918682	908049
PH02Gene08044							14528.5			42729.3	54368	37858.2
PH02Gene08045	0.00201208	0.000611123	0.743163	6.90906e-08	1.61919e-07	0.343703	131963	131843	134547	174327	180651	181047	59873.5	63757.9	60602.2
PH02Gene08046	0.000102264	4.89236e-05	1.69443	0.394453	0.0681746	0.991726	1.49971e+06	1.40308e+06	1326564	820102	855510	820415	849058	870839	755480
PH02Gene08047	0.888651	0.140168	1.24697	0.639993	0.105031	0.788404	78456	61939.7	52643.9	37069.5	61225.3	56511.7	39508.5	36833.3	45708.3
PH02Gene08059	1.4676e-05	1.00555e-05	1.54787	1.28686e-06	1.46296e-06	1.45415	964562	911956	875174	591218	599334	587176	861298	876360	847425
PH02Gene08060	0.0385704	0.00835068	0.954678	0.184235	0.0343701	0.529161	801405	505486	751165	1.30909e+06	251236	595431	420363	389502	330879
PH02Gene08062	0.0651748	0.0133787	0.988159	0.483933	0.0817861	0.998499	441711	443243	398083	418604	436218	443590	470482	374223	451758
PH02Gene08065	0.000267748	0.00010962	0.920239	2.16175e-05	1.38352e-05	0.833466	1.14328e+06	1.18218e+06	1.23234e+06	1.29228e+06	1.28358e+06	1.29031e+06	1051621	1.09986e+06	1.07085e+06
PH02Gene08066	3.90092e-06	3.52433e-06	0.433363	4.70652e-09	2.34602e-08	0.145562	7.6266e+06	7495567	7445688	17469018	17544326	17062694	2.50695e+06	2.56059e+06	2.51276e+06
PH02Gene08067	0.0225082	0.00515246	1.41411	0.0471169	0.00999893	0.820044	2.83371e+06	2.75221e+06	3.57402e+06	2.21994e+06	2.06504e+06	2.19255e+06	2.02026e+06	1.0882e+06	2.20339e+06
PH02Gene08068	1.9937e-05	1.29728e-05	1.31042	0.341753	0.0599624	0.974865	7.82152e+06	7357459	7269517	5651745	5616331	5.86267e+06	5.63635e+06	5.41451e+06	5.6493e+06
PH02Gene08069	0.000545686	0.00019941	0.711799	8.70022e-06	6.66203e-06	0.707046	234418	235621	225838	318461	335728	323442	253703	215330	222198
PH02Gene08070	3.13852e-10	3.56331e-09	3.8313	7.36988e-11	1.39436e-09	9.10422	1.87954e+06	1.83985e+06	1.936e+06	493506	501951	480644	4.51965e+06	4433105	4485995
PH02Gene08074	0.600771	0.0992288	1.11001	0.00201074	0.000610786	1.69424	67568.1	93233.7	66807.8	77027.4	66322.6	61701.6	111704	102778	132923
PH02Gene08078	4.71751e-12	2.90514e-10	3.16175	9.31963e-08	2.00802e-07	2.39112	656299	663877	679111	224294	206904	201138	513023	509412	489556
PH02Gene08081	0.0807273	0.0162508	1.08218	0.16002	0.0302069	1.07395	60926.9	69474.1	56814.4	58296.8	76517.7	38183.1	77111.8	40123.6	68554.9
PH02Gene08087	0.000673096	0.000237208	1.12141	0.00176916	0.000547265	1.30036	117038	114687	136832	97811.7	125252	105592	157740	141132	128497
PH02Gene08089	0.712358	0.115517	1.07191	0.325503	0.0573636	1.54545	119637	131737	82238	120359	81956.2	108915	152828	160965	167199
PH02Gene08090	0.00290263	0.000844875	0.552573	8.2366e-06	6.39008e-06	0.778715	33253	42188.2	39725.8	74058.7	63317.8	71042.8	58078.5	47662.3	56558.4
PH02Gene08094	0.00374252	0.00105453	0.38144	0.000543161	0.000198656	0.21387	15125.1	16444.6	12193.4	45652.8	39641.1	29437.5	11818	5241.04	7478.55
PH02Gene08105	0.0142743	0.0034424	1.17984	0.0285676	0.00636096	0.763666	200680	167779	197484	159172	165740	154765	148564	132749	84999.8
PH02Gene08114	0.000303164	0.000121811	5.03737	4.01188e-06	3.60569e-06	5.7972	305870	320441	310568	65257.5	60301.9	60426.3	408896	335080	334221
PH02Gene08116	0.235035	0.0427997	1.26521	0.0787718	0.0158906	1.2757	16621.8	26845.9	22438.6		21945.8	12781.7	27727.3	16046.4	22679.1
PH02Gene08127	0.00012153	5.65642e-05	23.6716	0.00111378	0.000366546	30.3602	803347	796081	881852	76224.9	20321.5	8274.42	1.05556e+06	1.12278e+06	1.00405e+06
PH02Gene08132													45683.7	199594	196545
PH02Gene08145	0.000534206	0.00019594	0.445724	0.194878	0.0361915	1.22923	18399.7	20519.6	41907.5	62549.8	56309.6	62479.1	83329	74794.6	64783
PH02Gene08152	4.86454e-05	2.6545e-05	5.28855	0.000832864	0.000284762	4.32906	167875	165683	181070	29677.5	24715.1	42917.2	136859	156139	128261
PH02Gene08153	0.0545934	0.01144	0.694156	0.0303357	0.00671421	0.62182	31296.1	43262	32123.4	67603.2	31887.2	54194.8	33608.3	42120.4	19835.8
PH02Gene08156	0.129413	0.0249285	0.488373	0.954379	0.14926	1.0305	7456.49	15263.2		19472.2	19522.7	30786.9	12668.2	14104.7	45137
PH02Gene08159	0.000250846	0.000103964	0.670638	0.000120662	5.62107e-05	0.602573	72173.5	89436.3	79074.8	116880	118254	123755	71149.9	91604.7	53502.2
PH02Gene08166	2.91127e-05	1.75816e-05	1.32085	0.00058585	0.000211405	2.08356	310357	278819	252273	165595	238462	232995	457086	436755	433494
PH02Gene08167	8.14805e-05	4.05603e-05	1.61718	0.000450207	0.000169146	2.6932	143061	147830	173666	94434.2	94750.9	98079.2	267426	248598	257637
PH02Gene08170	0.00200057	0.000608195	1.45767	0.00193365	0.000590902	1.72387	264823	206032	203018	177000	153273	132022	315702	299446	181791
PH02Gene08173	0.612893	0.101044	0.946708	0.0654977	0.0134376	0.859252	159590	196753	214456	235724	171726	195480	191989	230692	95388.1
PH02Gene08177							71203.5	75817.8	73760.3				92140	72016.7	95327.8
PH02Gene08179	0.000109106	5.16252e-05	12.5435	0.000441403	0.000166417	4.75611	387347	371372	352152	26656.7	30386.9	31518.1	86176.8	97775.7	237257
PH02Gene08184	0.000231659	9.71938e-05	0.675902	0.0770887	0.0155812	0.96341	170498	128433	190354	238248	240244	245407	233868	234841	228703
PH02Gene08186	0.00308473	0.000891274	0.689396	0.0152103	0.00364189	0.750702	312858	345553	295899	484822	434976	464471	364464	365607	309102
PH02Gene08196	1.91563e-08	6.44846e-08	5.96352	4.80213e-08	1.24596e-07	6.37913	2.70987e+06	2742472	2744241	509138	464304	401014	2.97696e+06	2.92532e+06	2.86554e+06
PH02Gene08199	0.0230138	0.00525336	0.798054	0.240495	0.0437049	1.04435	65315.3	78458.9	75550.1	93221.6	90113.9	91488.5	93669.6	99660.8	93681.2
PH02Gene08203									10430.8	76849.1	72123.2	65566.7
PH02Gene08206	0.000410519	0.000156757	2.92914	0.000207768	8.86186e-05	0.993314	962276	938930	958188	355418	320028	300744	321845	344866	302952
PH02Gene08209	0.554901	0.0925052	1.10963	0.00935292	0.00236538	0.525141	40390.9	39430.5	29501	37305.7	31010.7	30205.3	20830	14787.1	16120.7
PH02Gene08219	0.000172942	7.58999e-05	4.04533	0.000194374	8.38717e-05	1.93577	275272	270494	254791	76260.9	57413.9	64221.6	132437	142975	107670
PH02Gene08225	4.03697e-07	6.00335e-07	0.533082	8.56103e-08	1.88692e-07	0.531131	175888	161550	184169	330347	333396	314730	160230	193613	165854
PH02Gene08240	2.89296e-06	2.76834e-06	0.712903	0.000493569	0.000182788	0.80105	1.59784e+06	1.49179e+06	1.5224e+06	2.22313e+06	2.07639e+06	2169847	1.71481e+06	1.75719e+06	1710291
PH02Gene08242	0.00710252	0.00185172	0.977998	4.90063e-07	6.97936e-07	1.1442	503097	522756	529235	527952	520543	541578	607732	613757	597870
PH02Gene08245	0.000443363	0.00016701	1.98274	0.000100671	4.83218e-05	2.17342	88282.2	69444.7	71406.9	47192.1	42178.1	26194.2	98009.5	75843.4	77317.3
PH02Gene08251	0.000245488	0.000102038	0.282765	0.108243	0.0211988	0.188521	25208.5	39880.2	36108.3	119740	110047	128097		42097.5	2881.43
PH02Gene08252	2.43501e-08	7.66896e-08	10.638	1.49471e-06	1.64514e-06	4.09007	81615792	84334400	80582728	7635680	7.81261e+06	7726421	31763876	32747142	30275182
PH02Gene08254	0.413157	0.0710148	0.906191	0.00183706	0.000565382	1.16546	187851	253820	233642	260333	242675	242214	299530	294973	274027
PH02Gene08255	0.0934384	0.0185559	0.68468	0.0113767	0.00281577	0.690117		44648.7	32419.6	60026.7	60974.9	47840	42375.3	38200	35945.2
PH02Gene08263	0.458775	0.0779257	1.26619	0.0139274	0.00336688	1.63733	100364	106403	108866	80042.4	84674.1	84561.1	131336	134322	142490
PH02Gene08265	2.93328e-08	8.75928e-08	35.7532	8.14215e-05	4.05387e-05	4.29474	369590	345793	339516	7130.15	4381.58	17993.3	44228.2	20465.2	62023
PH02Gene08268	0.00129666	0.000417976	0.640662	0.000240699	0.000100251	0.868342	2542309	4754514	4938571	6.42568e+06	6523194	6.14918e+06	5.42288e+06	5322404	5838347
PH02Gene08269	2.86087e-06	2.74441e-06	191.336	4.62915e-09	2.32417e-08	274.969	1.1913e+06	525361	1.20413e+06	5304.42		4872.44	1.36229e+06	1.38082e+06	1.45437e+06
PH02Gene08271	0.0019859	0.000604233	1.80226	2.1013e-05	1.35251e-05	1.82971	123174	150865	140615	71617.5	76266.8	82190.8	135378	148954	136639
PH02Gene08283	0.000293865	0.000118645	0.644826	0.00379465	0.00106678	0.858178	564106	564620	538510	857105	890462	837991	762268	729037	727564
PH02Gene08286	3.16704e-05	1.88495e-05	8.51258	2.66662e-09	1.5607e-08	5.49812	8195557	8017217	7986336	954014	951320	937414	5.13038e+06	5372450	5126943
PH02Gene08296	0.0141717	0.00341957	0.653308	0.0550024	0.0115119	0.903913	49645.8	40889.5	17261.6	55995.4	59496.9	49509.3	63508	42743	42896
PH02Gene08301	2.72164e-06	2.63522e-06	2.92549	2.14981e-13	4.34554e-11	2.57436	1.41462e+06	1.41607e+06	1.42758e+06	466041	511969	477568	1255060	1.26032e+06	1.23181e+06
PH02Gene08305	0.0153697	0.00367545	1.34825	0.00769331	0.00199052	1.46004	20019.9	17208.4	19265.8	14798.9	14043	13059.9	16882.2	19399.6	24896.3
PH02Gene08308	0.00744921	0.00193199	0.793037	1.90674e-06	1.99204e-06	0.536588	6174817	5.80868e+06	5839425	7.85888e+06	7.42217e+06	7193215	4237363	4003827	3.81824e+06
PH02Gene08313	3.9268e-05	2.24339e-05	1.30598	1.74889e-05	1.16532e-05	1.78655	585060	567290	576204	440970	427932	454665	771362	804995	788266
PH02Gene08314	0.207575	0.038297	0.71366	8.42841e-05	4.17555e-05	0.528002	22062.5	38586	35331.3	50814.1	42917.1	40758.2	27689.1	19850.5	23471
PH02Gene08321	0.0170769	0.00403238	1.17034	8.32894e-06	6.44628e-06	0.639662	293208	267600	318715	254374	234495	262639	183620	167320	129770
PH02Gene08326	0.00505308	0.00137234	1.08099	4.00042e-05	2.27492e-05	0.888223	375340	365194	350626	336894	353450	319068	288750	295400	312433
PH02Gene08329	0.571403	0.0949166	1.10301	0.575885	0.0955447	1.18501	6653.44	6601.8		6380.4	6101.38	5544.26		9682.47	4558.24
PH02Gene08333	0.478111	0.0808813	0.821072	0.117712	0.0228717	0.612485	60435	64118.1	75879.5	79915	78214.2	85981.9	60852.1	40427.8	48234.5
PH02Gene08343	0.00019419	8.38202e-05	1.34318	0.00654978	0.00172198	1.37702	42487.7	49690.4	50060.4	35094.3	36807.6	33994.9	47509.6	46258.7	52053.5
PH02Gene08346	0.00474181	0.00129814	1.03364	0.103511	0.0203567	1.11834	55751.9	44342.9	57311.4	47118.7	54717.1	50447.6	58945.5	66646	44713.5
PH02Gene08348	0.000100124	4.81219e-05	0.829405	0.0196093	0.00456219	0.98514	1.64918e+06	1.5889e+06	1.52559e+06	1.96077e+06	1.87438e+06	1.90834e+06	1.91156e+06	1.83827e+06	1.90831e+06
PH02Gene08349	0.000470438	0.000175248	1.95389	9.85138e-07	1.18938e-06	0.73494	2.76643e+06	3.14445e+06	3066374	1.55279e+06	1470467	1.5713e+06	1.12531e+06	1.05999e+06	1.19143e+06
PH02Gene08354	0.397911	0.0686858	1.00829	0.000715564	0.000249662	0.241654	22762.1	35455.4	41045.5	33500.4	36701	28246	12935.4	7706.55	3148.17
PH02Gene08356	0.328027	0.0577574	1.02657	0.0139037	0.00336243	1.34435	79692.4	76779.2	82298.7	64956.5	82636	84998.5	98895.9	111186	102601
PH02Gene08358	0.000408904	0.000156232	2.12629	5.02479e-05	2.72759e-05	2.17739	216758	310046	334518	113643	146509	144931	327301	304258	250463
PH02Gene08361	5.11139e-11	1.18292e-09	5.25849	1.53316e-07	2.93064e-07	3.94732	900201	919956	891485	164328	170638	180703	697610	653347	684556
PH02Gene08362	0.0302625	0.00669974	1.12736	2.03129e-05	1.31694e-05	2.30681	119805	100346	124579	114823	126751	64211.1	230903	244886	229600
PH02Gene08365	0.00105802	0.00035069	2.34251	0.000688525	0.00024166	2.94484	59745	46327.1	46474	23014.6	20467.6	21638.6	68120.6	63265.6	60384.1
PH02Gene08374	0.042585	0.00912385	0.659928	0.000346352	0.000136021	1.19693		10853.8	10850.7	16701.7	14262.6	18369.4	19755.5	19684.7	19609.1
PH02Gene08379	0.015875	0.00377989	1.53796	0.109586	0.0214298	1.64653	12018.5	13470.4	16698.4	7948.89	8485.01	10996.9	14815.8	15027.8	15322.1
PH02Gene08383							17403.3	12122.6	10671.1		8803.97		28763.2	16795.3	19434.2
PH02Gene08385	0.075235	0.015247	4.23976	5.92462e-05	3.13209e-05	8.54953	27586.7	47854.6	56282.6	10406.7	11174.7	9487.28	95326.3	68452.9	101844
PH02Gene08387	0.618372	0.10185	0.630983	0.272416	0.0489058	2.00111	26236.2	73968.2	178644	320444	79275.7	42207.2	98614.3	514789	270942
PH02Gene08389	2.11044e-05	1.35604e-05	1.27304	6.60559e-05	3.42571e-05	1.26144	472857	474846	457067	384223	338726	380531	460928	429009	502037
PH02Gene08391	0.688999	0.112224	0.989613	0.492163	0.0830633	0.990679	2.47813e+06	2.45626e+06	2462682	2.48491e+06	2.48415e+06	2.50565e+06	2.50667e+06	2.43259e+06	2.46578e+06
PH02Gene08392	3.50299e-05	2.04389e-05	1.92195	3.52397e-06	3.26103e-06	1.75991	228795	232428	255452	125157	124452	123280	212503	224474	219272
PH02Gene08393	0.000425561	0.000161572	0.866957	5.4154e-06	4.57818e-06	0.79795	1.48994e+06	1.47644e+06	1.40909e+06	1654402	1.73284e+06	1.65968e+06	1.33125e+06	1.35856e+06	1.33738e+06
PH02Gene08394	4.26513e-08	1.14604e-07	1.60708	2.4783e-09	1.48354e-08	1.93596	760568	724442	792279	489958	455923	471158	946139	895282	901907
PH02Gene08396	1.83673e-07	3.32458e-07	2.14424	4.80315e-07	6.88974e-07	1.40998	1.3327e+06	1.39596e+06	1.3967e+06	632866	654908	636151	870711	905663	936313
PH02Gene08413	0.406904	0.0700607	1.16416	0.0645138	0.0132579	1.25516	217634	174483	217576	197814	149261	176645	214969	219316	223067
PH02Gene08414	0.0245588	0.00556207	1.45289	0.000283837	0.00011526	2.00164	246759	274805	214862	153856	177281	175734	320857	349763	343955
PH02Gene08421	0.0145832	0.00350873	1.2027	0.671183	0.109588	1.14998	373814	461516	456956	346299	378540	349645	505430	372209	357996
PH02Gene08435	3.87211e-08	1.06094e-07	0.843299	0.0576137	0.0119897	1.13134	97076.1	103012	100087	120871	119322	115760	133269	134148	135288
PH02Gene08436	0.00218084	0.000656726	0.656002	1.01494e-05	7.55954e-06	0.577773	134120	141718	149526	230094	208568	209756	120114	129711	124814
PH02Gene08453	3.51835e-08	9.95587e-08	1.81781	1.85395e-05	1.22208e-05	10.0437	293078	325873	334976	176413	172202	176150	1.81654e+06	1.79878e+06	1.65529e+06
PH02Gene08464	0.503873	0.0847912	0.369281	0.000112218	5.27894e-05	0.165978	67069.8	58221.2	59643	220383	136289	144123	34926.3	24546	23648.9
PH02Gene08465	0.000583667	0.000210764	4.38134	1.90931e-10	2.63978e-09	6.33879	54870.5	158674	151742	37400.9	26598.5	19374	172483	180590	175413
PH02Gene08466	0.758686	0.122091	3.27646	0.109713	0.0214526	0.82387	142100	21860.4	6167.84	13873.9	11143.1	26907.4	13236.7	11110	18432.3
PH02Gene08468	7.14433e-06	5.69263e-06	0.601561	1.31084e-08	4.94084e-08	0.436646	2.08024e+06	1.97102e+06	2040439	3.28748e+06	3.49473e+06	3344281	1.35636e+06	1.42929e+06	1.63605e+06
PH02Gene08474				0.108501	0.0212429	1.52553		19678		46292.6		35297.9		63324.1	61144.9
PH02Gene08477	0.664987	0.108713	1.01865	0.085829	0.0171977	0.929547	1.22808e+06	1.2326e+06	1.25435e+06	1.18902e+06	1.19901e+06	1259000	1.11558e+06	1.10544e+06	1.16906e+06
PH02Gene08479	0.000324918	0.000128972	1.83516	0.000147756	6.67567e-05	1.82978	113821	92886.4	123458	52108.1	87458	40344.9	103908	122860	102429
PH02Gene08480	3.47841e-05	2.03522e-05	0.423911	2.7219e-05	1.66789e-05	0.476506	52475.7	69246.9	120208	189309	173130	208271	92974	100719	78253.7
PH02Gene08494	0.00279318	0.000816687	1.93407	0.283712	0.050723	0.983399	39464.1	37642.5	41189.1	23965	16261.2	20938.1	16816.9	17436.1	25896
PH02Gene08497	0.723742	0.117097	1.074	0.000799102	0.000274931	0.151565	38118.5		105183	64117.8	62353.2	73670		9908.12	10314.9
PH02Gene08498	0.140016	0.0267405	1.6009	0.0484083	0.0102487	1.97842	14454.8	6320.87	2161.3	3481.9		6069.83	6938.93	10420.7	10986.4
PH02Gene08506	2.96898e-05	1.78552e-05	0.74198	7.7571e-07	9.96846e-07	0.617275	2209016	2.03402e+06	2162787	2.66027e+06	3036773	2.93638e+06	1.62183e+06	1.90643e+06	1.80094e+06
PH02Gene08515	0.497239	0.0838108	1.03117	0.000346403	0.000136021	0.76742	650990	630244	594818	672228	592004	555117	473978	461154	461073
PH02Gene08518				0.187835	0.0349762	0.9278		1589.71		5463.32	7939.93	18957.9	8555.17	6209.17	15260.4
PH02Gene08519	0.0581899	0.0120963	0.96098	0.0114821	0.00283958	0.916292	790824	747095	755028	795148	831689	759215	763837	736214	686268
PH02Gene08524	1.7034e-08	5.95041e-08	1.93819	2.46977e-09	1.48186e-08	2.23423	310347	305445	288485	147574	152399	166584	336706	341497	364195
PH02Gene08529	0.00550715	0.00147877	0.767223	3.46614e-07	5.36052e-07	0.483928	290314	181843	266099	335795	294213	332237	167370	141979	156308
PH02Gene08540	0.00222219	0.000667662	4.50336	7.66911e-05	3.86137e-05	3.44357	150024	175500	177708	35331.6	40599.5	35814.7	150857	119069	114878
PH02Gene08548	0.620742	0.102195	1.03268	0.22271	0.040796	1.12124	148596	160734	160242	143285	150198	161229	163143	172762	173934
PH02Gene08556	0.00100765	0.000336167	0.75749	8.68114e-05	4.28031e-05	0.903483	199007	205912	203676	269076	274234	260127	236799	249388	239704
PH02Gene08561	0.401112	0.0691692	0.845758	0.000922214	0.000311247	1.22919	186055	210928	213421	273802	226617	221306	305248	295485	286405
PH02Gene08569	0.00126661	0.000409664	0.729873	9.43219e-05	4.58777e-05	0.187506	733964	722454	703913	992708	992107	975056	179628	184077	191289
PH02Gene08572										7222.39	19639.8	22978.7		15358
PH02Gene08575	5.18843e-07	7.31329e-07	0.393372	3.0139e-08	8.91617e-08	0.576341	531133	552093	524307	1.34709e+06	1.4197e+06	1.31976e+06	824050	811984	719208
PH02Gene08607	4.83761e-06	4.17969e-06	1.46732	2.28734e-07	3.90823e-07	0.757129	8510021	8318134	8332864	5.68912e+06	5.73376e+06	5.7247e+06	4337142	4.46867e+06	4177122
PH02Gene08609	7.96908e-05	3.98377e-05	0.771293	0.000467767	0.000174479	0.837861	918912	905515	925337	1.21499e+06	1.18993e+06	1.16021e+06	1.01337e+06	1.00224e+06	971471
PH02Gene08613	0.0716432	0.0145852	0.910124	9.78409e-05	4.72877e-05	0.603513	1.03258e+06	1.20013e+06	1.27032e+06	1.21594e+06	1.34779e+06	1.28522e+06	637297	859800	825800
PH02Gene08614	0.00244111	0.00072628	0.729013	0.310792	0.0550367	0.889229	39548.8	37188.9	43315.6	64299.9	48513.4	51865.9	40574.2	50417.6	55445.7
PH02Gene08617	0.00203773	0.000617826	1.65935	0.00010947	5.17311e-05	0.581312	443674	529399	498366	216747	345951	324058	179182	172883	163417
PH02Gene08618	0.100607	0.0198443	1.03987	0.00709381	0.00184982	1.55224	65383.6	69956.9	69572.1	62552.8	59674	74829.4	103285	106526	96068.4
PH02Gene08627	0.000226326	9.53727e-05	1.27142	5.97667e-06	4.92576e-06	1.60047	830160	791570	794385	646126	641070	613134	1059908	1.04071e+06	940798
PH02Gene08628	0.0155676	0.00371867	0.65246	0.00361732	0.00102303	0.637205	154957	154613	156084	248922	235932	228835	161021	154411	139335
PH02Gene08631	0.030624	0.00677052	0.948494	0.0705939	0.0143874	0.974463	2.93577e+06	2.71729e+06	2.55125e+06	2688843	3.10358e+06	2857421	2.76953e+06	2.92161e+06	2737808
PH02Gene08638	0.000630412	0.00022464	0.841472	1.26063e-05	8.93747e-06	0.619	1.32677e+06	1.26706e+06	1.35497e+06	1.58491e+06	1.5632e+06	1.54461e+06	1.02442e+06	926436	953942
PH02Gene08640	0.00458387	0.00126009	0.960604	1.14068e-06	1.329e-06	0.842368	884252	892216	863719	923304	926384	898777	775361	765948	773912
PH02Gene08641	0.00269326	0.000792443	0.839138	0.140012	0.0267405	0.9323	134079	161848	170253	200622	172131	182793	152655	200510	164770
PH02Gene08642	8.77139e-06	6.7086e-06	1.43517	6.26781e-05	3.27808e-05	1.48544	176313	183005	156850	116366	137736	105554	181695	191780	160774
PH02Gene08665	0.000122552	5.69377e-05	0.690279	0.000192783	8.3324e-05	0.647889	364929	312541	298865	476962	494249	443195	305945	323072	287362
PH02Gene08671	0.0198581	0.00461261	0.746821	0.379206	0.065807	0.954258	187111	194664	210826	259316	274182	260000	237591	256098	263514
PH02Gene08675	0.00316458	0.000910994	0.843604	0.000135548	6.20305e-05	0.633205	202281	202062	226237	238213	252483	256788	139112	174633	159565
PH02Gene08676									663.287
PH02Gene08680	0.000486858	0.00018069	2.42485	0.000111646	5.25681e-05	1.66167	312479	317961	340449	129492	130875	140025	233286	224285	207746
PH02Gene08685	0.283889	0.0507477	0.951125	2.04301e-06	2.09556e-06	1.37311	592632	528350	541770	603871	572992	571331	800324	832540	767603
PH02Gene08690	0.447431	0.0762085	0.92374	2.22615e-05	1.41669e-05	0.520395	39239	31844.2	9550.96	25515.3	32123.5	29652.2	18458.9	12701.4	14265.6
PH02Gene08692				0.0458629	0.00975518	4.16164					11110.6	10438.6	59500.2		30180
PH02Gene08693	1.9123e-06	1.99705e-06	4.12994	8.01626e-07	1.01904e-06	2.2294	50923608	47185076	49101368	11900881	11703832	12039887	26558740	26958658	25948650
PH02Gene08694	0.000165043	7.30518e-05	0.76083	4.81545e-08	1.24816e-07	0.415407	950366	967250	969236	1.18078e+06	1.29748e+06	1.31608e+06	561510	504223	510462
PH02Gene08701	0.0138042	0.00334178	4.0062	0.0306096	0.00676846	2.14829	67789.5	107018	95310	17197.8	36854.9	13372.2	26486.4	99580	18781.8
PH02Gene08702	1.33626e-06	1.50853e-06	4.57327	6.90847e-05	3.54519e-05	1.0999	425658	327070	392388	83760.5	108583	58049.2	84545.5	98017.7	92844.6
PH02Gene08706							25433.7	10839.8	22090.2				43390.2	40300.4	41698.2
PH02Gene08713	1.66732e-05	1.11787e-05	1.5243	0.00339723	0.00096861	1.4785	259097	234965	259750	174614	141344	178572	269653	237185	224323
PH02Gene08717	0.0156718	0.00373983	0.757773	0.00943903	0.00238506	0.45767	604938	535120	442007	728955	728632	630195	348930	121013	485572
PH02Gene08719	3.13655e-05	1.87024e-05	2.2665	0.000359541	0.000140393	1.20322	730367	708946	716470	305807	323758	321586	383608	383818	377018
PH02Gene08720	0.000261152	0.000107428	1.28785	2.34302e-07	3.97676e-07	1.36792	632929	579159	583111	453439	483293	457218	631277	649154	626377
PH02Gene08724	0.0132546	0.00322318	0.695597	0.000577049	0.000208748	0.674519	123527	111791	106982	167489	170534	154072	125657	122445	83825.4
PH02Gene08726	0.000209763	8.9382e-05	2.47731	4.3894e-05	2.44253e-05	2.80826	523887	325706	495889	186879	179232	177011	597293	500386	427550
PH02Gene08730	6.55343e-06	5.29669e-06	8.11141	1.1897e-07	2.4377e-07	14.4669	1.70505e+06	1.67528e+06	1.68515e+06	197734	195719	231035	3.09059e+06	2951263	2.99257e+06
PH02Gene08731	0.0302224	0.00669198	0.990554	6.42157e-05	3.34433e-05	0.83597	518959	508720	510625	517869	527341	507764	421374	462811	414055
PH02Gene08747	0.140162	0.0267625	0.811633	6.90551e-05	3.54437e-05	1.27717	956505	890207	986194	1.09526e+06	1.22185e+06	1.17328e+06	1.51792e+06	1.57812e+06	1.36176e+06
PH02Gene08751	0.588223	0.0973486	0.860956	0.262264	0.0472783	0.744348	86166.1	86039.2	90740.2	96511.4	86592.7	122307	64033.9	72770.7	90527.3
PH02Gene08753	3.86264e-08	1.06059e-07	3.51877	2.10429e-10	2.81023e-09	2.7897	5200771	5007711	4835799	1.42276e+06	1.44407e+06	1.40861e+06	3.85768e+06	4.03345e+06	4.03606e+06
PH02Gene08757	4.18597e-10	4.37502e-09	6.26645	3.43305e-10	3.7932e-09	8.49753	957835	1070458	1047602	186777	150573	153502	1.44534e+06	1383639	1.34205e+06
PH02Gene08765	0.0360069	0.00785275	1.04112	0.751508	0.121071	0.990715	6417819	6.30916e+06	6194886	6034484	6080489	6059552	6069854	5899347	6.03657e+06
PH02Gene08774							203824	152098	724989				177340	180007	184053
PH02Gene08785	0.000202893	8.69972e-05	0.24801	0.00481615	0.00131613	0.302042	33746.6	27056	10948	97003	91330.8	100972	39466.9	38161.4	9754.28
PH02Gene08787	8.88794e-05	4.36235e-05	0.489686	0.000108683	5.14436e-05	0.670245	776111	726897	717376	1.53381e+06	1.48954e+06	1.51096e+06	1.06317e+06	973821	1.0021e+06
PH02Gene08790	0.975812	0.152084	0.956159	1.26267e-05	8.94466e-06	1.26564	59524.4	60577.8	70664.5	70757	65729	63027.6	87866.6	78202	86444.2
PH02Gene08800	0.0282974	0.00630723	1.08968	4.67697e-05	2.57218e-05	1.25583	1.70564e+06	1.62867e+06	1668049	1.59478e+06	1.54438e+06	1.45151e+06	1.9221e+06	2058240	1.78475e+06
PH02Gene08802	0.518595	0.0870482	1.40054	2.08663e-05	1.34474e-05	0.824698	113989	118932	125158	91423.4	73338.3	90909.7	57052.6	76671.2	77128
PH02Gene08806	0.786007	0.125948	1.03246	0.00161906	0.000506132	1.43394	73647.1	75928.6	90046.8	77780.7	76572.5	77735.7	116517	109876	106409
PH02Gene08817	7.57374e-09	3.31265e-08	0.81498	0.000224906	9.48478e-05	1.15587	1.02004e+06	1.03292e+06	1.0653e+06	1.26998e+06	1.26631e+06	1.28989e+06	1.51384e+06	1.47262e+06	1.4361e+06
PH02Gene08822				0.672502	0.109776	0.924803	57833.2			521175	840559	814966	556377	731846	724796
PH02Gene08823	2.44056e-09	1.46773e-08	1.49032	3.59014e-08	1.01038e-07	1.33666	441925	460063	466771	293726	315284	309421	415126	405530	406971
PH02Gene08838	0.630129	0.103563	1.34012	0.000320237	0.000127583	1.49007	132153	147408	132448	114799	88647.2	103995	149469	152626	156013
PH02Gene08841	4.93421e-09	2.42692e-08	2.03334	1.58549e-06	1.72963e-06	1.76947	3397675	3.3408e+06	3.31815e+06	1.65736e+06	1.64905e+06	1.63945e+06	2.92489e+06	2.91436e+06	2.91234e+06
PH02Gene08845	3.65806e-05	2.12024e-05	1.08019	0.00204464	0.000619703	1.2014	665430	634374	647613	601464	617774	583604	708664	732026	725251
PH02Gene08847	2.47772e-07	4.16759e-07	11.4108	2.85349e-06	2.73935e-06	5.16977	2.05477e+06	1.98371e+06	2.02979e+06	166803	164381	200616	946945	862743	939593
PH02Gene08850	0.000407968	0.00015592	0.682309	0.132417	0.0254316	1.0725	937274	948428	954076	1.38146e+06	1.41385e+06	1.3667e+06	1.59329e+06	1.41829e+06	1.45219e+06
PH02Gene08852	0.092958	0.018469	0.925692	6.22628e-06	5.0814e-06	1.8185	228288	215019	198561	242722	226183	224486	420414	451118	389405
PH02Gene08857	2.26872e-07	3.88411e-07	3.85206	1.82907e-06	1.93173e-06	5.58591	106504	114334	117425	30898.9	27667.9	29246.8	159382	166972	164164
PH02Gene08867	0.441603	0.0753347	0.827271	0.00381816	0.00107258	1.10371	5663.32	7904.69	3830.75	5532.47	7737.71	7761.33	7710.26	6664.48	8837.86
PH02Gene08868	9.79442e-05	4.73287e-05	0.823295	1.6668e-08	5.86206e-08	1.35588	156500	162117	167374	201232	187327	201742	271092	259696	269589
PH02Gene08870	0.00659848	0.00173426	1.28494	0.000932742	0.000314391	4.50792	40243.7	32936.4	23391.1	27042.8	22387.2	25726.1	108375	102732	127690
PH02Gene08885	0.015773	0.00376047	1.07396	0.00131108	0.000421628	0.685921	141544	154279	154366	130773	159902	128511	98614.7	93801.1	95112.6
PH02Gene08886	0.000451723	0.000169543	1.03255	0.000119888	5.59306e-05	1.90775	348222	340314	343683	332421	333666	333592	635702	642737	628700
PH02Gene08888	0.0238165	0.00541228	0.823282	0.0117306	0.00289386	0.882422	518728	518997	501763	657374	612868	599696	527689	570464	551924
PH02Gene08890	0.13987	0.0267164	0.842041	0.000148228	6.69235e-05	0.678422	355941	392908	369973	426104	441040	461558	253131	342345	305945
PH02Gene08893	0.080097	0.0161402	0.97029	8.6417e-05	4.26653e-05	0.589032	331333	302264	317598	336350	313064	330906	194059	196614	186767
PH02Gene08895	0.000140565	6.39763e-05	1.79108	0.45183	0.0768668	1.09386	272864	290636	276169	154856	157721	156229	184575	208411	119823
PH02Gene08897							309160	338361						81415.2	277965
PH02Gene08898	0.495588	0.083576	1.12744	0.126304	0.0243839	0.796686	50185.8	31863.3	41282.8	36508.7	41469.6	31412.5	24932.7	33537.2	28680.2
PH02Gene08902	0.404993	0.0697921	9.23595	0.199921	0.0370298	0.189639	331726		67602.1	0.0479002	26124.7	38729.7	12272.6	13.758	12.6044
PH02Gene08908							14201.1		34170.7				44416.2	35519.8	41161.9
PH02Gene08912	0.032744	0.00719502	1.16175	1.22701e-06	1.40913e-06	2.12413	374542	421411	444189	344043	369615	353817	776030	781722	709699
PH02Gene08920	3.07439e-05	1.84037e-05	1.36403	0.000361223	0.000140873	1.50087	652818	581089	612580	464735	423922	465040	648617	725416	657691
PH02Gene08925	8.77317e-05	4.31746e-05	0.816454	0.000208382	8.88511e-05	0.790577	100506	102752	97894.1	119794	117734	131325	96717.1	96800.7	98089
PH02Gene08930	0.00159087	0.000498252	1.85919	0.00653966	0.00171967	3.22305	48812.4	44580.2	47868.7	29027.7	24752.9	22199.2	90504.1	84239.3	70143.5
PH02Gene08931	0.00670901	0.00176099	1.19795	0.08605	0.0172353	1.14502	87559	85827.5	82423.1	51848.2	78218.6	83473.1	71852.1	84120.4	88534.2
PH02Gene08935	0.000338166	0.000133271	0.836492	2.11418e-10	2.81023e-09	1.52137	2.15999e+06	2.05639e+06	2.00163e+06	2536381	2.4391e+06	2.45795e+06	3.712e+06	3810892	3.78608e+06
PH02Gene08936	0.0465452	0.00988652	0.825472	6.86037e-05	3.52959e-05	2.45987	204952	220236	183287	254127	234625	248371	591315	675577	546338
PH02Gene08940	0.516502	0.0867307	0.830625	0.0180712	0.00424241	0.488135	16751.7	13558.5	16422.4	13749.7	26724.9	15787.4	20720.7	2682.2	4060.55
PH02Gene08954	0.000455154	0.000170683	0.330848	9.17398e-06	6.95495e-06	0.439462	294563	275830	419871	967764	1.04865e+06	976694	443585	391147	480624
PH02Gene08956	0.00436579	0.00120654	0.939745	0.0465734	0.00989054	1.38386	10763.2	7243		8452	7498.19	12790.8	12135.7	15217.3	12420.5
PH02Gene08957	8.16275e-05	4.05945e-05	0.533923	0.000251095	0.000104051	0.574003	85109.4	123803	87667.1	182683	172780	200010	118663	97656.1	102524
PH02Gene08965	0.513566	0.0862655	1.15527	0.801334	0.128095	1.10088	45233.7	59688.5	50753.4	51458	53606.7	29688.2	52501.3	52488.4	43356.5
PH02Gene08967	3.10904e-06	2.93682e-06	2.72071	8.61934e-06	6.62029e-06	1.52622	422459	455895	390816	123252	164113	179121	252591	244348	215021
PH02Gene08968							17044.9	11529.3	16828.5		8265.06		22319	14024.7	21153.6
PH02Gene08971	0.263534	0.0474723	0.882765	0.00303515	0.000878614	0.576843	85352.8	78405.6	72923.2	74689.8	101314	92110.1	51074.1	49145	54440.4
PH02Gene08981				0.0198791	0.00461708	2.66499	19517.1				24022.7	35721.1	84659.4	71344.8	82821
PH02Gene08985	5.01916e-05	2.72568e-05	0.69134	1.11944e-06	1.30998e-06	0.325816	416254	419382	404448	561684	641348	590707	199975	192945	191509
PH02Gene08988	0.0153484	0.00367071	1.83587	1.36457e-06	1.53116e-06	3.58654	62634.4	63408.4	57798.6	34574.5	38397.3	27166.8	123528	115716	119907
PH02Gene08989	0.000179198	7.82494e-05	0.877754	0.372511	0.0647846	1.00774	233394	275517	268482	292844	290374	302444	285408	310117	296988
PH02Gene08993	0.00335539	0.000958789	1.36814	0.000215849	9.16279e-05	1.16831	113238	108364	132108	78120.3	103642	76770	116331	91230.1	94485.3
PH02Gene09002	0.721895	0.116823	0.990156	2.39351e-06	2.377e-06	0.633137	544759	584317	553077	589843	551181	557854	388620	333725	353277
PH02Gene09003	0.00426028	0.00118141	0.528142	0.196344	0.0364324	1.80038	7003.11	4267.78	7569.44	14353.9	9769.63	11549.4	27563.6	10101.5	26559.8
PH02Gene09009	0.000625184	0.000223114	0.833888	3.19897e-05	1.8996e-05	0.624394	226115	226409	220458	263423	274285	269332	164048	162133	177730
PH02Gene09015	1.19154e-05	8.5482e-06	2.27684	1.81542e-05	1.2004e-05	1.57845	1063319	983153	1.18151e+06	439201	505838	472708	825820	754350	657677
PH02Gene09016	6.91213e-09	3.10507e-08	0.404028	2.17981e-09	1.36408e-08	0.358602	81100.8	67589.9	82331.5	183652	185025	203121	75942.8	72008.3	57096.9
PH02Gene09017	0.00887373	0.00225763	1.86124	4.71108e-06	4.0922e-06	2.57697	45280.9	54865.2	66065.3	27656.3	41354.1	20291.1	77417.4	69284.1	83425.9
PH02Gene09026	0.00398431	0.0011131	0.785981	0.947129	0.148318	0.826702	65004.7	83025.3	146418	176302	79328.2	118995	101414	100593	107696
PH02Gene09038	0.0047485	0.0012997	0.898095	0.00549924	0.00147695	0.904565	375958	373944	408669	421368	427228	441437	392579	366868	407470
PH02Gene09041	1.65643e-07	3.1067e-07	1.34789	1.24941e-06	1.42979e-06	1.53317	693058	725333	693635	514720	500457	551734	802447	806456	793437
PH02Gene09047	0.202375	0.0374335	1.4427	0.00030227	0.000121506	2.10094	71619	76943.1	77758	33623.9	74885.9	48362.6	114255	97988.2	117336
PH02Gene09058	0.00798972	0.00205981	0.627664	0.00198817	0.000604711	0.134616	21645.3	11002.3	19367.1	26415.8	27422	29032.5	3621.42		3815.68
PH02Gene09059	0.372661	0.0648063	1.11497	0.000439854	0.000165905	2.32263	15884.2	16188.5	11401.7	21981.4	9124.38	7885.78	24138.6	30266	36158.6
PH02Gene09066	0.000972408	0.000325938	1.54963	5.49251e-10	5.27281e-09	3.3497	25129.8	27720.1	29874.2	17683.4	16170.6	19529.2	57368.5	58969.9	62478.8
PH02Gene09071	0.000129134	5.95004e-05	4.73558	0.000249029	0.000103294	5.73568	2.68362e+06	3276933	2.44208e+06	489605	758799	525956	2.74733e+06	4175817	3254022
PH02Gene09077	0.953954	0.149231	1.00282	0.949692	0.148692	1.12203	120712	133649	82736.4	136136	92048.2	107966	125012	105672	146486
PH02Gene09085	4.58876e-07	6.62622e-07	3.14028	9.95639e-05	4.78973e-05	1.92041	1.4159e+06	1.55047e+06	1.55974e+06	466273	533883	441151	990022	893379	884503
PH02Gene09086	0.108452	0.0212349	0.608518	2.88304e-06	2.76056e-06	0.00598307	2.50841e+06	137824	2.4835e+06	2.81089e+06	2.76336e+06	2855628	15163.9	18460.5
PH02Gene09089	0.0229929	0.00524922	3.33329	0.424388	0.0727041	0.628573	244430	245084	399454	132657	27020.7	107016	14111.5	22327.8	131197
PH02Gene09102	0.110256	0.021547	0.925726	0.00365537	0.00103289	0.819223	2.67722e+06	2463616	2.49174e+06	2.79785e+06	2715091	2732030	2.39973e+06	2.2282e+06	2.12655e+06
PH02Gene09103	0.000139904	6.37203e-05	1.77264	2.13848e-05	1.37097e-05	2.33242	221699	184470	174731	111798	103409	112497	250414	249787	264140
PH02Gene09105	0.000713711	0.000249083	1.2799	0.000616811	0.00022052	1.23717	497181	567293	638969	420771	465013	445135	584522	557181	504870
PH02Gene09108	0.000743728	0.000258272	0.867663	6.67734e-05	3.45049e-05	1.53741	216956	202387	173481	234482	252511	196249	337552	350565	362307
PH02Gene09112	0.0016325	0.000509811	0.755436	0.401294	0.069196	0.939016	128266	121184	126762	175017	156436	166553	159894	156048	151694
PH02Gene09114	1.98691e-06	2.05347e-06	3.43209	5.76066e-12	3.17694e-10	2.47863	997135	996806	1.01914e+06	279387	309678	288849	742965	726019	707042
PH02Gene09115	2.20119e-06	2.22157e-06	0.647427	0.000140918	6.41029e-05	0.778524	8743729	8341186	8417398	13460435	12866939	13062899	10349236	10135056	10181985
PH02Gene09121	1.46352e-09	1.04215e-08	1.89514	1.35931e-05	9.47131e-06	0.919631	5202164	5.39896e+06	5.36242e+06	2.78297e+06	2.88884e+06	2.7516e+06	2.60469e+06	2578151	2563586
PH02Gene09128	8.60417e-05	4.25043e-05	0.546376	2.7317e-09	1.5815e-08	0.396996	691830	713110	708234	1.27587e+06	1.30715e+06	1.28459e+06	534440	495082	505904
PH02Gene09133	0.00983923	0.00247365	1.1948	0.0308961	0.00682485	2.2484	16444.2	14167.1	20232.7	19398.6	11928.4	11227.2	36916.4	25350.3	33412.2
PH02Gene09134	0.124964	0.0241522	0.991694	9.22626e-08	1.99453e-07	0.668441	701228	738275	786270	756782	751934	735698	504294	516339	479625
PH02Gene09137	0.0290301	0.00644892	1.6803	0.0294193	0.00652811	0.996691	254568	407824	311564	199764	196409	183462	225848	227858	124011
PH02Gene09139	0.0269603	0.00604402	0.996513	0.0198155	0.00460438	1.27448	29209.6	18793.9	23540.8	24796.7	26776.8	20221.2	27709.7	34624.1	29167.2
PH02Gene09142	0.0301921	0.00668642	3.34077	0.0510615	0.0107673	2.34723	78602.8	34805.5	27762.4	9591.01	15349	17316.9	31397	39572.8	28217
PH02Gene09167	9.50065e-05	4.60896e-05	0.675044	0.00131283	0.000422137	0.70311	127778	110146	107776	154236	189599	168279	110086	129867	120119
PH02Gene09173	0.0208482	0.00481535	3.60749				37435.6	22662.6	32054.8	4690.1	11739.4	9115.43	9514.99
PH02Gene09176	5.37331e-14	1.74095e-11	2.44388	2.30708e-11	6.64438e-10	1.58694	3.34842e+06	3.29507e+06	3261635	1.34944e+06	1.38763e+06	1.31597e+06	2.17673e+06	2150075	2.10512e+06
PH02Gene09180	2.62868e-08	8.12101e-08	3.78036	4.35732e-09	2.24983e-08	3.85719	1.28813e+06	1.28046e+06	1.27475e+06	334864	337480	344316	1.32858e+06	1.31314e+06	1.27974e+06
PH02Gene09181	0.198945	0.0368728	1.04688	0.00519418	0.0014058	1.00492	432813	380934	429567	384266	407464	395913	407770	404873	380840
PH02Gene09184	0.00823753	0.00211508	1.60106	0.00104182	0.00034616	1.74646	116867	161684	98279.3	87071.5	54819.4	93471.7	145596	153776	111680
PH02Gene09189	0.492471	0.0831045	0.683479				67335.6	109937		38402.3	154241	196409		30923.1
PH02Gene09192	0.123879	0.0239677	0.968102	0.12685	0.0244822	1.22434	896380	983454	796168	601414	1.14182e+06	1.02094e+06	1.0773e+06	1257642	1.04934e+06
PH02Gene09206				0.338693	0.0594607	2.61579			5859.72	4333.19	8106.64		22559	9981.03
PH02Gene09207	6.80805e-05	3.50794e-05	1.61639	0.0033191	0.000949676	0.883384	2978273	3.30658e+06	2754582	1.90296e+06	1.76781e+06	1.92158e+06	1.5614e+06	1.54902e+06	1.82977e+06
PH02Gene09229	1.14274e-06	1.33004e-06	0.585827	0.00139423	0.000444342	0.605544	288722	273676	286200	500408	469156	478984	363379	245881	267899
PH02Gene09232	0.130308	0.0250655	0.800267	0.172167	0.0322906	1.04751	53143.6	75911.7	79616.4	81540.5	90980	88232.2	87812.4	85399.9	99929.5
PH02Gene09244	0.00832661	0.00213478	1.43071	0.00169882	0.000527662	0.746223	50264.1	48129.9	42106.2	26803.4	32606.9	38792.7	24026.9	24820.4	24434.1
PH02Gene09247	0.000115801	5.42387e-05	1.50863	2.29717e-05	1.45226e-05	1.50432	542378	586887	539381	379366	372783	353919	561045	554919	547920
PH02Gene09253	0.79078	0.126634	1.25404	0.000488915	0.000181375	1.60532	282309	279038	277746	207685	230555	230874	344285	355552	374302
PH02Gene09290	0.000227138	9.56527e-05	0.217583	0.00063926	0.000227448	0.152391	87126.7	110539	114567	358900	529815	546288	74014	85519.8	59147.1
PH02Gene09292	0.409164	0.0704124	1.10747	3.1434e-05	1.87303e-05	1.59041	155112	150846	152993	124707	136967	152740	210600	205003	243486
PH02Gene09324	0.307727	0.0545461	0.228945	0.740718	0.119555	1.36637	223843		360362	2672909	235528	919160	3.90993e+06	588263	731706
PH02Gene09325	0.125104	0.0241758	2.18094	0.93537	0.146645	3.1129	24917.5	67943.9	89516.8	18062.2	18618.8	46942.5	125150	90879.9	44281.2
PH02Gene09328	3.45257e-05	2.02193e-05	1.66892	0.00799053	0.00205981	1.29318	118399	119028	102864	63029.2	74332.6	66536.8	76367.3	99982.6	87328.1
PH02Gene09356	0.000652162	0.000231024	1.03662	0.0226528	0.00518052	1.04056	916097	911115	1.00703e+06	918926	956616	858565	906010	968210	970781
PH02Gene09357	1.92106e-05	1.25901e-05	1.4464	0.00689075	0.00180303	1.56738	163414	178783	188266	128191	136641	101916	172338	211541	190957
PH02Gene09362	0.0054426	0.00146416	0.699709	1.93997e-06	2.01944e-06	0.657792	792871	904702	838312	1.31174e+06	1.17428e+06	1.13817e+06	871600	727196	785174
PH02Gene09364	0.0609746	0.0126064	0.872111	0.0340107	0.00745314	0.842145	36613.5	22495.4	35103	31073.6	42483.4	34470.3	33555	35007.6	22412.1
PH02Gene09374	0.000514667	0.000189896	1.47039	7.6322e-05	3.84727e-05	1.5568	364751	332996	333930	236224	242019	223394	375388	365996	350928
PH02Gene09380	1.14134e-06	1.329e-06	1.75936	3.81216e-07	5.73483e-07	1.87565	823500	888094	835954	481663	485684	480652	925961	894382	895600
PH02Gene09381	0.440136	0.075124	1.4583	0.587189	0.0972142	0.53399	28143.8	36913.7	47495.3	37258	15405.1	24517.7		18574.2	8901.63
PH02Gene09382	0.0334027	0.0073292	1.83503	0.258811	0.0467386	0.873925	131364	73871.2	93150.5	91822.1	29782.4	41000.6	54320.4	38605.7	49178.6
PH02Gene09389								169521				212879	120079	92319.3	90342.8
PH02Gene09390	0.00340181	0.000969809	0.900841	0.000427443	0.000162073	1.37711	73693.9	83863.8	84187.4	78089.7	93457.8	96807.5	125809	126868	116876
PH02Gene09395	0.573373	0.095201	0.888521	0.116034	0.0225712	0.94863	461717	651354	591337	619839	580298	718117	582055	591576	646082
PH02Gene09401							8693.88	17199.9	20086.1						17752
PH02Gene09403	1.77577e-07	3.25747e-07	2.53118	2.84517e-07	4.62072e-07	2.5673	677817	736921	731196	270920	284300	292580	734523	723748	718292
PH02Gene09405	0.696187	0.113213	1.12334	0.000324303	0.000128767	0.433375	97810.4	107641	104095	90734.7	95473.3	89350.1	44297.1	36817.3	38305.6
PH02Gene09415	0.599464	0.099032	0.664194	0.627482	0.1032	0.683237	266332	241557	244207	765209	68334.3	298799	196421	400543	176694
PH02Gene09416	0.00238049	0.000709547	0.559965	0.00216685	0.000653154	0.556119	150198	117368	123006	249523	247214	200758	113916	126764	147209
PH02Gene09417										4349.37	10676		12793.2
PH02Gene09418	0.000943478	0.000317638	1.7482	0.000693103	0.000243012	3.03811	131988	121480	135598	65538.1	81451	75563.5	209482	189104	277553
PH02Gene09422	0.122525	0.0237269	6.07112	0.025854	0.00581918	5.38592	15082.4	60384	50920.2	4014.23	10831.4	5972.08	44684.7	41788.1	25649.7
PH02Gene09435	4.88636e-06	4.2162e-06	0.652211	6.61488e-06	5.34136e-06	0.207241	363072	374180	332652	540137	560711	539579	119752	106826	113385
PH02Gene09438	0.975139	0.152006	1.25407	0.0521739	0.0109768	1.58415	64900.8	73527	65073.1	53108.5	73987.6	35176	89478.3	68954.3	98630.2
PH02Gene09444	0.0012461	0.00040409	0.796717	2.31827e-05	1.46381e-05	0.633982	19034178	19079830	19122522	23767526	24349448	23723482	14943468	15119829	15482285
PH02Gene09449	0.112398	0.0219297	1.33459	0.0458078	0.00974427	1.26263	130557	120649	177788	120069	105649	95724.9	124681	143541	137640
PH02Gene09453	0.575501	0.0955049	0.929819	0.000835395	0.000285477	0.792298	56494.2	56749.3	58678	66142.2	61726.3	57029.5	48789.8	45647.5	52056.9
PH02Gene09459	0.00182741	0.000562816	2.09064	0.000413824	0.000157809	1.39904	44636.7	52595.2	54853.3	25158.9	22864	24722.8	32476.8	39069.2	30228.4
PH02Gene09462	0.023577	0.00536537	0.694823	0.00245108	0.000728579	0.625703	88109.4	87771.3	97480.1	129423	137660	126343	81619.3	81417.1	83131
PH02Gene09486	0.00516076	0.00139748	2.06006	0.10884	0.0213025	1.565	55986.2	65361.8	42060.6	26526.8	25800.6	26995	36528.7	47341.6	40268.9
PH02Gene09492	1.09674e-07	2.28849e-07	3.26044	3.63789e-08	1.0205e-07	2.86231	47508.3	53252.2	49795.6	12677.2	13880.6	19618.8	46055.4	44851.1	41265.4
PH02Gene09495	0.00553289	0.00148429	0.647213	0.674865	0.110113	0.931944	31771.8	52865.2	55348.4	52726.6	74574.5	88988.4	74294.9	62701.8	64573.1
PH02Gene09496	0.149501	0.0283826	1.31221	0.0174902	0.00412132	2.38425	34671.4	33549	35621.8	28104.7	24833.7	26196.7	58737.5	66779.7	63160.3
PH02Gene09508	0.0222182	0.00509236	0.777808	0.000614053	0.000219777	0.789896	80869.7	68680	78610.4	99039.8	95774.6	98522.8	77417	74605.1	79683.9
PH02Gene09521				5.05186e-06	4.33017e-06	0.230883				118831	124056	109507	23723.4	30854.1	26784.5
PH02Gene09528	2.13789e-07	3.70912e-07	2.2094	9.92105e-05	4.77537e-05	2.04657	164206	171899	184427	73354.2	81650.9	80594.1	154583	165442	162146
PH02Gene09529	0.00149028	0.000470556	0.683983	0.0309281	0.00683133	0.896813	216512	163967	202772	282884	279714	290131	253626	251219	259892
PH02Gene09532	0.000587642	0.000211963	0.426869	0.581861	0.0964335	1.06307	26571.9	13908	10288.4	27742.3	44277	46912.8	44546.5	43362.4	38524.5
PH02Gene09538	0.0259421	0.00583747	0.66569	0.755097	0.121573	0.890984	254297	240261	252813	394456	369701	358544	323033	334349	342926
PH02Gene09555	0.000132092	6.07168e-05	1.18759	9.49334e-05	4.60628e-05	1.04677	5228434	4873618	4.86348e+06	4081263	4220263	4.30012e+06	4438218	4.45215e+06	4300617
PH02Gene09556							91557.8	81099.5	54977.1		14711.9		61597.9	123414	128737
PH02Gene09561	6.01245e-05	3.16882e-05	1.51191	2.45015e-06	2.42374e-06	0.882	1.31082e+06	1.38537e+06	1.43802e+06	910466	918823	905135	819061	817526	775177
PH02Gene09576	1.12264e-07	2.33163e-07	1.73338	2.60307e-07	4.31956e-07	1.61144	811694	825091	799355	440272	492953	472200	763509	757276	743970
[truncated: 7,035 more rows]
