# Supplementary material for: Data-Independent Acquisition Proteomics Reveals the Effects of Red and Blue Light on the Growth and Development of Moso Bamboo (Phyllostachys edulis) Seedlings
Source: Int J Mol Sci. 2023 Mar 7;24(6):5103. doi: 10.3390/ijms24065103 (PMC10049362; doi:10.3390/ijms24065103)
Supplement: Supplementary file 1 [file ijms-24-05103-s001.zip › Table S2.xlsx]

## Sheet: Sheet1
Table S2. Homologous gene names of the enriched proteins in Fig.3B
Homologous gene name in Arabidopsis	Homologous gene locus in Arabidopsis	Gene locus
GXM2	AT4G09990	PH02Gene37597
	AT5G60920	PH02Gene21702
IRX14-L	AT5G67230	PH02Gene00471
	AT4G24910	PH02Gene31208
XT1	AT3G62720	PH02Gene00018
IRX9	AT2G37090	PH02Gene00093
IRX10	AT1G27440	PH02Gene07283
