# Supplementary material for: Data-Independent Acquisition Proteomics Reveals the Effects of Red and Blue Light on the Growth and Development of Moso Bamboo (Phyllostachys edulis) Seedlings
Source: Int J Mol Sci. 2023 Mar 7;24(6):5103. doi: 10.3390/ijms24065103 (PMC10049362; doi:10.3390/ijms24065103)
Supplement: Supplementary file 1 [file ijms-24-05103-s001.zip › Table S3.xlsx]

## Sheet: Light reaction
Table S3. The detailed fold change ratios of protein abundances in light and dark reactions between red and blue light treatments in Fig.5 and Fig.S5
EC number	Homologous gene name	Homologous gene locus	Gene locus	[1] blue-1.raw.PG.Quantity	[2] blue-2.raw.PG.Quantity	[3] blue-3.raw.PG.Quantity	[4] dark-1.raw.PG.Quantity	[5] dark-2.raw.PG.Quantity	[6] dark-3.raw.PG.Quantity	[7] red-1.raw.PG.Quantity	[8] red-2.raw.PG.Quantity	[9] red-3.raw.PG.Quantity	pvalue of t test (blue_vs_red)	R/B_ratio	R > B (ratio > 1.5, p < 0.05)	blue_mean	dark_mean	red_mean
7.1.2.2	ATPF1D-1	AT4G09650.1	PH02Gene06465	189914	211750	222562	100956	101051	95353.5	490641	562855	483124	0.000362683	2.46164	Up	208075	99120.2	512207
	ATPF1D-2	AT4G09650.1	PH02Gene01015	1.3499e+06	1.2674e+06	1.36731e+06	627236	572267	563680	2.9487e+06	2.95636e+06	2.7749e+06	1.96512e-05	2.17837	Up	1.3282e+06	587728	2893321
	ATPF1G-1	AT4G04640.1	PH02Gene12750	2.43146e+06	2.60095e+06	2.47378e+06	1.18509e+06	1.17076e+06	1.12613e+06	4.93426e+06	4901026	4668582	1.83798e-05	1.93225	Up	2.50206e+06	1.16066e+06	4.83462e+06
	ATPF1G-2	AT4G04640.1	PH02Gene33124	677292	653562	621776	333852	243405	254314	889162	673138	665815	0.288008	1.14108	Stable	650877	277190	742705
	ATPFb	AT4G32260.1	PH02Gene00153	468735	539978	522423	270643	257966	244949	1.37589e+06	1.30775e+06	1.26617e+06	3.07239e-05	2.57966	Up	510379	257853	1.31661e+06
1.18.1.2	FNR-1	AT4G05390.1	PH02Gene36829	561373	561968	597780	376504	383888	375705	871007	872607	883152	1.81481e-05	1.52619	Up	573707	378699	875589
	FNR-2	AT4G05390.1	PH02Gene15219	367059	357973	441347	251493	233027	267559	524885	485022	521243	0.0142836	1.31274	Stable	388793	250693	510383
	FNR-3	AT5G66190.1	PH02Gene31331	8.12156e+06	7.70976e+06	7.55422e+06	1.48146e+06	1.43407e+06	1.51255e+06	9102629	9160535	9184635	0.00137623	1.17371	Stable	7.79518e+06	1.47603e+06	9.14927e+06
	FNR-4	AT1G20020.1	PH02Gene17082	3.92547e+06	4.02326e+06	3.80369e+06	555886	541051	569934	3.7983e+06	3657065	3973737	0.388327	0.972489	Stable	3.91747e+06	555623	3.8097e+06
	Lhca1	AT3G54890.1	PH02Gene18154	10388717	6.10099e+06	7.56233e+06	4260360	1.15039e+06	217128	2.12625e+06	3.31666e+06	3.1799e+06	0.017312	0.358507	Down	8.01735e+06	1.87596e+06	2.87427e+06
	Lhca3	AT1G61520.3	PH02Gene45771	5.29295e+06	5586988	6.20179e+06	38329.9	51020.8	38914.2	8823300	8.1829e+06	9360051	0.00202664	1.54354	Up	5693909	42754.9	8.78875e+06
	Lhcb1-1	AT2G34420.1	PH02Gene01341	2.57339e+06	2.45696e+06	2.4579e+06	14049.8	15736.4	11807.3	4316181	4.35176e+06	4.15192e+06	1.65969e-05	1.712	Up	2.49608e+06	13864.5	4273287
	Lhcb1-2	AT1G29930.1	PH02Gene04237	6.07424e+06	7.48623e+06	7.88199e+06	45471.2	43229.5	41472.6	11951229	12663114	11877619	0.00114136	1.70186	Up	7.14749e+06	43391.1	1.2164e+07
	Lhcb1-3	AT2G34430.1	PH02Gene49412	5512672	5612445	5538295	26525.5	32861.3	31231.5	8783697	8862878	8966234	6.73016e-07	1.59708	Up	5.55447e+06	30206.1	8.87094e+06
	Lhcb2	AT2G05100.1	PH02Gene32299	5651088	5.46857e+06	5.23434e+06	17885.9	22331.5	20750.9	6.87391e+06	6.81078e+06	7.12552e+06	0.000650079	1.27249	Stable	5.45133e+06	20322.8	6.93674e+06
	Lhcb5	AT4G10340.1	PH02Gene47533	18411324	18722444	18414200	106797	132662	97770.7	22473814	22248992	23487514	0.000433165	1.22795	Stable	1.8516e+07	112410	2.27368e+07
	Lhcb6-1	AT1G15820.1	PH02Gene18375	3.88706e+06	3.75995e+06	3.45256e+06	20113.8	20554.4	24323.3	6.5927e+06	6.54459e+06	6394465	3.8562e-05	1.75969	Up	3.69986e+06	21663.8	6510586
	Lhcb6-2	AT1G15820.1	PH02Gene02202	1.71298e+06	1.89619e+06	1.78517e+06	10449.3	6590.24	7299.71	3.07801e+06	3.13237e+06	3.11385e+06	1.92664e-05	1.72852	Up	1.79811e+06	8113.08	3.10807e+06
	Lhcb6-3	AT1G15820.1	PH02Gene24983	2.24342e+06	1927903	1.83892e+06	29400.9	37053.2	11801.4	1.90943e+06	2452106	2.45977e+06	0.285834	1.13495	Stable	2.00342e+06	26085.2	2.27377e+06
	PetA	ATCG00540.1	PH02Gene25496	3006823	3269083	3.24101e+06	987200	1.06675e+06	1.01939e+06	5051154	5.2187e+06	4.9007e+06	0.000108883	1.59406	Up	3.17231e+06	1.02445e+06	5.05685e+06
7.1.1.6	PetC	AT4G03280.1	PH02Gene40575	3.74984e+06	3.43392e+06	3.46346e+06	667893	617758	635716	4.04124e+06	3.82978e+06	4.09126e+06	0.0271454	1.12351	Stable	3549075	640456	3.98743e+06
	PetE	AT1G76100.1	PH02Gene36631	30853430	29454174	28128936	4.1727e+06	4.95245e+06	4459887	9675234	10076578	9229223	1.77063e-05	0.327704	Down	2.94788e+07	4.52834e+06	9660345
	PetF-1	AT1G32550.1	PH02Gene47999	115952	119949	115614	61481.4	60540.1	49089.5	87683	81522.8	80978.4	0.000190949	0.711731	Stable	117172	57037	83394.7
	PetF-2	AT1G60950.1	PH02Gene32076	5.56661e+06	5.15992e+06	4.90277e+06	995629	930382	811316	3.03862e+06	2.9396e+06	2.81618e+06	0.000363659	0.562687	Down	5.20977e+06	912442	2.93147e+06
	PsaD	AT4G02770.1	PH02Gene44906	35602616	32110774	37258444	621634	644711	1.08584e+06	44838700	39011288	38787812	0.0776517	1.16829	Stable	3.49906e+07	784061	4.08793e+07
	PsaE-1	AT2G20260.1	PH02Gene46332	6918194	7132098	6.97442e+06	1.86122e+06	1.79399e+06	1.93173e+06	8.3367e+06	8.17931e+06	8.2398e+06	9.38786e-05	1.17746	Stable	7.00824e+06	1.86231e+06	8.25194e+06
	PsaE-2	AT2G20260.1	PH02Gene32206	2.613e+06	2567471	2.61353e+06	621370	618802	632911	2.47518e+06	2532037	2.43231e+06	0.0224198	0.954519	Stable	2.598e+06	624361	2.47984e+06
	PsaF	AT1G31330.1	PH02Gene23390	6.93033e+06	7010753	6757579	86464.6	82901.4	76032.7	6873441	6.87995e+06	7354961	0.481253	1.01979	Stable	6.89955e+06	81799.5	7.03612e+06
	PsaN	AT5G64040.1	PH02Gene15850	1.8701e+06	1830390	1.81648e+06	4084.82	5965.05	2810.35	1.14384e+06	1128101	1.0648e+06	1.5075e-05	0.604815	Down	1.83899e+06	4286.74	1.11225e+06
	Psb27-1	AT1G03600.1	PH02Gene12408	1.73982e+06	1.71265e+06	1602530	406578	377527	395553	968191	965703	920937	8.07503e-05	0.564754	Down	1.685e+06	393220	951611
	Psb27-2	AT1G03600.1	PH02Gene43892	3.45536e+06	3170303	2956709	590778	421774	498285	998134	842892	983724	0.000122897	0.294786	Down	3.19412e+06	503612	941583
	PsbO-1	AT3G50820.1	PH02Gene49304	11139198	10949297	10689483	834689	784462	771792	10289584	10896578	10142243	0.142431	0.955776	Stable	1.0926e+07	796981	1.04428e+07
	PsbO-2	AT3G50820.1	PH02Gene42972	47855780	46235968	46446764	2419292	2.36871e+06	2.32032e+06	39503364	39384780	41009748	0.000704412	0.853132	Stable	4.68462e+07	2.36944e+06	39965964
	PsbP-1	AT1G06680.1	PH02Gene49705	40885340	34009932	33659836	5039336	4890419	4944060	17412712	18308068	17707914	0.001484	0.49218	Down	36185036	4.95794e+06	1.78096e+07
	PsbP-2	AT1G06680.1	PH02Gene40843	11007981	11307434	11394602	1529573	1.4645e+06	1541583	5317207	5442126	5435981	1.21494e-06	0.48043	Down	1.12367e+07	1.51188e+06	5398438
	PsbP-3	AT3G55330.1	PH02Gene23953	4161508	3.76197e+06	3769199	1.12288e+06	1.22059e+06	1.11172e+06	1.54686e+06	1.48552e+06	1.46935e+06	5.75455e-05	0.385005	Down	3.89756e+06	1.15173e+06	1.50058e+06
	PsbP-4	AT1G06680.1	PH02Gene08252	81615792	84334400	80582728	7635680	7.81261e+06	7726421	31763876	32747142	30275182	2.85233e-06	0.384477	Down	82177640	7.7249e+06	31595400
	PsbQ-1	AT1G14150.1	PH02Gene25002	307398	355220	329632	58636.2	40379.3	38536.4	180916	184147	200454	0.000704548	0.569934	Down	330750	45850.6	188506
	PsbQ-2	AT4G21280.1	PH02Gene08693	50923608	47185076	49101368	11900881	11703832	12039887	26558740	26958658	25948650	3.55415e-05	0.539814	Down	4.907e+07	1.18815e+07	2.64887e+07
	PsbQ-3	AT4G21280.1	PH02Gene44774	79425944	76717424	74209424	5.86542e+06	5808390	5.73827e+06	38147196	38626376	37558472	1.48349e-05	0.496335	Down	76784264	5.80403e+06	3.81107e+07
	PsbQ-4	AT3G01440.1	PH02Gene43006	528033	493320	529981	11778.9	12369.1	14913.1	258961	240697	250291	3.33819e-05	0.483422	Down	517111	13020.4	249983
	PsbR-1	AT1G79040.1	PH02Gene44799	7596574	6693655	6.73833e+06	137653	61814.4	94088.4	2.98592e+06	3.08405e+06	12138960	0.773271	0.865914	Stable	7.00952e+06	97851.8	6.06964e+06
	PsbR-2	AT1G79040.1	PH02Gene08265	369590	345793	339516	7130.15	4381.58	17993.3	44228.2	20465.2	62023	3.37406e-05	0.120122	Down	351633	9835.02	42238.8
	PsbS-1	AT1G44575.1	PH02Gene20159	1.16649e+06	932303	949383	113729	109447	107725	2.44149e+06	2.44227e+06	2.45157e+06	4.57577e-05	2.40647	Up	1.01606e+06	110300	2.44511e+06
	PsbS-2	AT1G44575.1	PH02Gene22313	4.1858e+06	4309148	4.16911e+06	1.06756e+06	1.06596e+06	1.15957e+06	9083067	8701754	9230501	8.14532e-06	2.13323	Up	4.22135e+06	1.0977e+06	9.00511e+06

## Sheet: Dark reaction
					[1] blue-1.raw.PG.Quantity	[2] blue-2.raw.PG.Quantity	[3] blue-3.raw.PG.Quantity	Both_B	[4] dark-1.raw.PG.Quantity	[5] dark-2.raw.PG.Quantity	[6] dark-3.raw.PG.Quantity	Both_D	[7] red-1.raw.PG.Quantity	[8] red-2.raw.PG.Quantity	[9] red-3.raw.PG.Quantity	pvalue_t test(red_vs_blue)	R/B_ratio	blue	dark	red	RB_res	RB_up	B_up_R_down	B/D_pvalue	B/D_qvalue	B/D_Ratio	B_res	B_up	onlybres	onlybup	R/D_pvalue	R/D_qvalue	R/D_Ratio	R_res	R_up	R_down
		PRK-3	AT1G32060	PH02Gene08757	957835	1070458	1047602	B	186777	150573	153502	D	1.44534e+06	1383639	1.34205e+06	0.00132338	1.35604	1.0253e+06	163617	1.39034e+06	Brres	brup		4.18597e-10	4.37502e-09	6.26645	res	bup			3.43305e-10	3.7932e-09	8.49753	res	rup
		PRK-2	AT1G32060	PH02Gene03788	11760168	10427097	10055310	B	1.73682e+06	1.57121e+06	1.60968e+06	D	12488842	12404376	13071521	0.0268909	1.17747	10747525	1.63924e+06	12654913	Brres	brup		2.89022e-07	4.67924e-07	6.55641	res	bup			5.27799e-09	2.54285e-08	7.71999	res	rup
	2.7.1.19	PRK-1	AT1G32060	PH02Gene02276	7.93599e+06	7.52932e+06	7.55576e+06	B	948099	1.01047e+06	1.01855e+06	D	8897506	8407437	8433497	0.011796	1.11804	7.67369e+06	992375	8579480	Brres	brup		2.8711e-09	1.6108e-08	7.73265	res	bup			4.48632e-08	1.18835e-07	8.6454	res	rup
		ALDO-2	AT4G38970	PH02Gene17733	49090152	47357832	46293092	B	8.18264e+06	7.87121e+06	7.68439e+06	D	48424640	48166820	49207080	0.307896	1.02142	4.75804e+07	7.91275e+06	4.85995e+07	Brres	brup		4.48847e-08	1.18835e-07	6.01313	res	bup			4.06952e-07	6.03611e-07	6.14193	res	rup
		ALDO-5	AT4G38970	PH02Gene46367	679234	643884	691762	B	90835.6	115777	86779.3	D	581470	703408	754216	0.886812	1.01202	671627	97797.2	679698	Brres	brup		1.0693e-09	8.45005e-09	6.86755	res	bup			1.61809e-06	1.75779e-06	6.95007	res	rup
br		TPI-2	AT2G21170	PH02Gene31528	18807294	18235554	18080578	B	6.37755e+06	6506159	6506219	D	15007542	15220329	14820756	0.00017575	0.817232	1.83745e+07	6.46331e+06	15016209	Brres	brup		2.86968e-06	2.75107e-06	2.84289	res	bup			1.26552e-07	2.53887e-07	2.3233	res	rup
br	5.3.1.6	rpiA-1	AT3G04790	PH02Gene08753	5200771	5007711	4835799	B	1.42276e+06	1.44407e+06	1.40861e+06	D	3.85768e+06	4.03345e+06	4.03606e+06	0.00100464	0.792806	5.01476e+06	1.42515e+06	3.97573e+06	Brres	brup		3.86264e-08	1.06059e-07	3.51877	res	bup			2.10429e-10	2.81023e-09	2.7897	res	rup
		GAPA-4	AT1G42970	PH02Gene20510	8.27826e+06	8055333	8196165	B	466473	429214	476577	D	6409662	6662864	6303655	0.00016175	0.789905	8.17659e+06	457422	6458727	Brres	brup		8.58764e-05	4.24388e-05	17.8754	res	bup			2.58095e-09	1.53085e-08	14.1199	res	rup
ob	5.3.1.1	TPI-1	AT2G21170	PH02Gene05123	1.50068e+06	1.24215e+06	1.32057e+06	B	639588	679643	632128	D	1.04013e+06	1.04285e+06	1.1071e+06	0.0216337	0.785076	1.35447e+06	650453	1.06336e+06				2.91243e-05	1.75837e-05	2.08234	res	bup	onlyBres	onlybup	1.16144e-08	4.56234e-08	1.6348
	3.1.3.37	SBPASE-2	AT3G55800	PH02Gene11392	15769956	16000197	15985510	B	2.38355e+06	2.43592e+06	2.43781e+06	D	11731038	11744284	11875645	1.20341e-06	0.740247	1.59186e+07	2419093	1.17837e+07	Brres	brup		1.6741e-05	1.12155e-05	6.58038	res	bup			2.31799e-09	1.41704e-08	4.8711	res	rup
		ALDO-4	AT4G38970	PH02Gene35962	34585680	34447948	34593052	B	4882493	4875938	4850436	D	26062196	25098696	24666024	2.38909e-05	0.731732	3.45422e+07	4.86962e+06	2.52756e+07	Brres	brup		2.86745e-05	1.73817e-05	7.09341	res	bup			1.63117e-07	3.06598e-07	5.19047	res	rup
	1.2.1.13	GAPA-1	AT1G42970	PH02Gene00850	67255112	59675552	60219364	B	5359636	5212056	5.34465e+06	D	43464004	44906024	46472612	0.00254	0.720506	6.23833e+07	5.30545e+06	4.49475e+07	Brres	brup		2.076e-07	3.62356e-07	11.7584	res	bup			4.70685e-06	4.09126e-06	8.47196	res	rup
		rpiA-3	AT5G44520	PH02Gene13471	238295	242864	250279	B	86055.9	91855.8	86144.2	D	156843	181041	188079	0.00245344	0.719081	243813	88018.7	175321				1.50676e-06	1.65633e-06	2.77001	res	bup	onlyBres	onlybup	2.10225e-05	1.35279e-05	1.99186
		GAPA-2	AT1G12900	PH02Gene02213	4.07389e+06	3618968	3741907	B	557836	487898	489125	D	2.61498e+06	2.75621e+06	2.83556e+06	0.00202009	0.717701	3.81159e+06	511620	2.73558e+06	Brres	brup		1.19986e-06	1.38594e-06	7.45004	res	bup			3.50528e-07	5.41459e-07	5.3469	res	rup
		PGK-2	AT1G56190	PH02Gene42166	49483608	48722096	48065536	B	8499709	8.12102e+06	8204655	D	34221980	34856188	35044620	8.06935e-06	0.711847	48757080	8.27513e+06	34707596	Brres	brup		1.4144e-05	9.77664e-06	5.892	res	bup			1.84459e-12	1.64868e-10	4.19421	res	rup
	4.1.2.13	ALDO-1	AT4G26530	PH02Gene13951	2.45877e+06	2.39582e+06	2.36889e+06	B	63270.7	63809.1	71016.4	D	1.7619e+06	1681704	1673904	5.4485e-05	0.708453	2.40783e+06	66032.1	1.70583e+06	Brres	brup		1.52538e-09	1.07505e-08	36.4646	res	bup			2.41393e-09	1.45849e-08	25.8334	res	rup
	2.7.2.3	PGK-1	AT1G56190	PH02Gene02355	10346503	9449094	9510221	B	1848770	1696454	1.74512e+06	D	6917957	6917950	6694855	0.000610968	0.700569	9768606	1.76345e+06	6.84359e+06	Brres	brup		2.39359e-05	1.50077e-05	5.53949	res	bup			7.18072e-12	3.19038e-10	3.8808	res	rup
	2.2.1.1	TKL-2	AT2G45290	PH02Gene14490	21229222	21416098	21198906	B	7209595	7099387	7.13819e+06	D	14641263	14685027	14630818	7.41687e-08	0.688506	2.12814e+07	7.14906e+06	1.46524e+07	Brres	brup		3.63672e-06	3.34032e-06	2.97681	res	bup			2.89224e-08	8.71313e-08	2.04955	res	rup
	2.2.1.1	TKL-1	AT3G60750	PH02Gene13012	21620644	21262984	21716930	B	7111112	6947200	6.75014e+06	D	14441281	14323705	14121239	1.68415e-06	0.663868	2.15335e+07	6.93615e+06	1.42954e+07	Brres	brup		1.81602e-10	2.55823e-09	3.10453	res	bup			1.55235e-10	2.31247e-09	2.061	res	rup
	3.1.3.11	FBP-1	AT3G54050	PH02Gene00223	8.21585e+06	8.02549e+06	7792419	B	1.05068e+06	1032102	1.07948e+06	D	5343562	5.31629e+06	5.28826e+06	2.60664e-05	0.663571	8.01125e+06	1.05408e+06	5316037	Brres	brup		1.20806e-08	4.70165e-08	7.6002	res	bup			2.6528e-06	2.58331e-06	5.04328	res	rup
		FBP-2	AT3G54050	PH02Gene03500	5713845	5160719	4915621	B	319213	313443	317292	D	3.42777e+06	3.46002e+06	3.33949e+06	0.00148279	0.647698	5263395	316649	3.40909e+06	Brres	brup		6.29399e-05	3.28845e-05	16.6222	res	bup			4.42409e-07	6.45314e-07	10.7661	res	rup
		ALDO-3	AT4G38970	PH02Gene35243	7183336	6.77902e+06	7.04183e+06	B	1.47727e+06	1439677	1.29198e+06	D	4.35195e+06	4.47841e+06	4.71807e+06	9.99572e-05	0.645035	7.0014e+06	1.40297e+06	4.51615e+06	Brres	brup		1.84204e-08	6.28232e-08	4.99039	res	bup			2.21657e-09	1.37778e-08	3.21898	res	rup
		GAPA-3	AT1G12900	PH02Gene10057	97478016	87337624	85282016	B	8771871	8452702	8.26237e+06	D	55990800	55205084	55512180	0.000800138	0.617214	90032552	8.49565e+06	5.55694e+07	Brres	brup		6.64818e-05	3.44023e-05	10.5975	res	bup			5.82515e-06	4.84031e-06	6.54092	res	rup
	3.1.3.37	SBPASE-1	AT3G55800	PH02Gene07696	716180	630770	627585	B	58874.1	51324.5	67658.2	D	372103	419685	409840	0.00136064	0.608562	658178	59285.6	400542	Brres	brup		2.99437e-07	4.80284e-07	11.1018	res	bup			1.88735e-06	1.97577e-06	6.75615	res	rup
		FBP-5	AT1G43670	PH02Gene38194	2.51108e+06	2.44138e+06	2.61266e+06	B	226938	181293	211089	D	1.53821e+06	1.50158e+06	1.5499e+06	4.38962e-05	0.606691	2521709	206440	1.5299e+06	Brres	brup		3.74525e-06	3.41459e-06	12.2152	res	bup			6.65898e-16	1.72601e-12	7.41086	res	rup
		FBP-3	AT1G43670	PH02Gene20137	831788	740297	827522	B	20928.4	18429.8	17586.2	D	444906	438995	513883	0.000952613	0.582505	799869	18981.4	465928	Brres	brup		0.000532012	0.000195433	42.1395	res	bup			7.9536e-08	1.79893e-07	24.5465	res	rup
		FBP-4	AT5G64380	PH02Gene31700	2.00498e+06	1.91459e+06	2.14981e+06	B	602497	584748	554357	D	1.13757e+06	1.19937e+06	1170185	0.000270687	0.577838	2.02313e+06	580534	1.16904e+06	Brres	brup		2.65505e-06	2.58331e-06	3.48494	res	bup			1.04116e-11	3.80919e-10	2.01373	res	rup
br	4.1.1.39	rbcS-1	AT1G67090	PH02Gene30282	1028980032	1049081152	978901184	B	153412000	149635584	149975056	D	485111104	480107936	513784448	2.30202e-05	0.483815	1018987456	1.51008e+08	4.93001e+08	Brres	brup		4.61249e-07	6.6519e-07	6.74792	res	bup			5.2241e-07	7.3432e-07	3.26475	res	rup
ob		rpiA-2	AT3G04790	PH02Gene12180	159314	208432	154921	B	3638.81	22245.6	22625.8	D	39635.4	21148.2	82481.1	0.0071695	0.274103	174222	16170.1	47754.9				1.2473e-05	8.85994e-06	10.7744	res	bup	onlyBres	onlybup	0.0197541	0.00459285	2.95329
ob		rbcS-3	AT1G67090	PH02Gene44261	1.28964e+06	1.47405e+06	1.21424e+06	B	529367	441504	236400	D	343404	262467	365068	0.000272815	0.244081	1.32598e+06	402424	323646				5.45582e-06	4.60335e-06	3.29498	res	bup	onlyBres	onlybup	0.00105676	0.000350406	0.804242
		rbcS-2	AT1G67090	PH02Gene30287	1.30967e+06	1814188	1.38965e+06	B	547538	571242	448412	D	216464	154708	207591	0.00114272	0.128229	1.5045e+06	522397	192921	Brres		burd	0.00564108	0.00151004	2.88	res	bup			2.06764e-07	3.61629e-07	0.369299	res		rdown
