# Supplementary material for: Data-Independent Acquisition Proteomics Reveals the Effects of Red and Blue Light on the Growth and Development of Moso Bamboo (Phyllostachys edulis) Seedlings
Source: Int J Mol Sci. 2023 Mar 7;24(6):5103. doi: 10.3390/ijms24065103 (PMC10049362; doi:10.3390/ijms24065103)
Supplement: Supplementary file 1 [file ijms-24-05103-s001.zip › Table S4.xlsx]

## Sheet: Sheet1
Table S4. The detailed proteins abundances in Fig.7 and their fold change ratios between red and blue light treatments in Fig.S7
EC number	Homologous gene name	Homologous gene locus	Gene locus	[1] blue-1.raw.PG.Quantity	[2] blue-2.raw.PG.Quantity	[3] blue-3.raw.PG.Quantity	Both_B	[4] dark-1.raw.PG.Quantity	[5] dark-2.raw.PG.Quantity	[6] dark-3.raw.PG.Quantity	Both_D	[7] red-1.raw.PG.Quantity	[8] red-2.raw.PG.Quantity	[9] red-3.raw.PG.Quantity	Both_R	pvalue_t test(red_vs_blue)	R/B ratio	blue	dark	red
2.7.7.27	APL1-1	AT5G19220	PH02Gene12545	1502.69	3361.23	3412.4	B	1432.98	1241.45	1346.43	D	5144.27	4190.25	5113.65	R	0.0427675	0.492651	180372	6949.51	88860.4
	APL1-2	AT5G19220	PH02Gene27242	473218	429285	490474	B	15205	18510.4	15793.2	D	348751	291813	136235	R	0.0359212	0.828198	661404	79492.7	547774
	APL2	AT1G27680	PH02Gene27047	144785	134745	142717	B	51602.2	67021.8	59387.7	D	261990	288969	295812	R	0.000193656	2.54189	446128	401969	1.13401e+06
	APS1-1	AT5G48300	PH02Gene09180	588634	558394	557424	B	210526	239061	216258	D	486821	482402	473688	R	0.00134726	1.02032	1.28111e+06	338887	1.30715e+06
	APS1-2	AT5G48300	PH02Gene40790	7498484	7.54287e+06	7.36934e+06	B	11813382	11552105	11622863	D	5375572	5241940	5.52178e+06	R	2.64458e-05	1.19708	344252	49647.5	412097
3.1.3.24	AT2G35840	AT2G35840	PH02Gene19045	180118	112975	128599	B	8202.46	26654.1	31672.4	D	143049	186054	152790	R	0.451914	0.925095	530384	246611	490655
3.2.1.4	ATGH9A1	AT5G49720	PH02Gene12539	513658	549254	564152	B	26827.6	35232.7	24846.9	D	361445	390232	383604	R	0.00069579	2.49565	251124	82189	626717
3.2.1.21	BGLU11-1	AT1G02850	PH02Gene04686	111410	148934	120452	B	311245	332499	326002	D	170854	208431	181586	R	0.0195058	1.74572	2758.77	1340.29	4816.06
	BGLU11-2	AT1G02850	PH02Gene07146	1.28813e+06	1.28046e+06	1.27475e+06	B	334864	337480	344316	D	1.32858e+06	1.31314e+06	1.27974e+06	R	0.156009	2.0054	140749	59337.2	282257
	BGLU11-3	AT1G02850	PH02Gene26863	559448	547539	549920	B	1.02581e+06	1.02785e+06	1.03648e+06	D	364387	355330	368380	R	3.65746e-06	3.15456	36994.4	53799	116701
2.4.1.12	CESA1-1	AT4G32410	PH02Gene10641	69382.1	61823.3	75997.3	B	22723	20610	24113.4	D	117663	125076	108479	R	0.00160145	1.54328	54566.4	18786	84211.3
	CESA1-2	AT4G32410	PH02Gene20766	771645	750876	652457	B	1.52293e+06	1.52686e+06	1420314	D	438326	437124	494829	R	0.00292412	1.99354	58357.9	13370.9	116339
	CESA3	AT5G05170	PH02Gene34577	37196.3	66899.3	59603.7	B	18542	9059.96	28756	D	81979.9	81847.1	88806.9	R	0.0325065	2.00135	63997.8	14924.7	128082
	CESA4	AT5G44030	PH02Gene24001	261290	248618	243464	B	83983.5	72825.8	89757.6	D	626062	636125	617964	R	9.31005e-07	2.87269	16757.6	7120.29	48139.3
	CESA6-3	AT5G64740	PH02Gene24826	183059	176025	182031	B	3644.56	9978.07	7225.89	D	94562.6	80670.3	91348.2	R	4.23278e-05	1.63481	246646	90967.6	403221
	CESA6-4	AT5G64740	PH02Gene35057	580590	569932	584705	B	260017	263611	239545	D	739012	753160	706140	R	0.000453658	1.87339	31990.2	10270.8	59930
	CESA7	AT5G17420	PH02Gene25266	47643.2	51676.4	53207.3	B	13775.4	24745.2	26000.2	D	149924	138159	142309	R	1.72351e-05	1.62854	81446.7	33270.6	132639
	CESA8	AT4G18780	PH02Gene15083	555660	582678	554348	B	63583.3	81287.7	71037.5	D	555740	554624	580473	R	0.963063	2.82174	50842.3	21506.9	143464
	DPE2-2	AT2G40840	PH02Gene13487	15703.4	19743.9	14825.5	B	6047.84	8716.55	6596.48	D	49787.4	43985.2	50645.3	R	0.000263162	1.26687	578409	254391	732771
	DPE2-3	AT2G40840	PH02Gene35688	237820	236818	265301	B	74453.2	109320	89129.1	D	406605	429183	373875	R	0.00108363	1.03288	256620	84067.4	265057
5.4.2.2	PGM	AT5G51820	PH02Gene44935	520513	540839	529799	B	255836	239646	244352	D	477878	508220	485868	R	0.0213259	1.19917	1.59731e+06	653276	1.91546e+06
2.4.1.1	PHS2-1	AT3G46970	PH02Gene07694	71179.2	61396.4	42498.1	B	15396.4	14059.7	10656.5	D	107341	119938	121738	R	0.00373047	1.47289	126932	323249	186957
2.4.1.18	SBE2.2-1	AT5G03650	PH02Gene29455	54741.4	88183.3	101415	B	40074.6	33919.8	25817.4	D	130833	142220	124865	R	0.0257972	2.69672	174342	194293	470153
	SBE2.2-2	AT5G03650	PH02Gene31595	1.30276e+06	1.34882e+06	1.40937e+06	B	2.39156e+06	2.52925e+06	2446772	D	747620	732633	762983	R	4.63442e-05	2.25937	117541	122489	265568
2.4.1.14	SPSB-1	AT1G04920	PH02Gene05747	39981.5	35973.2	35028.6	B	56215.9	47988.9	57192.3	D	114149	116647	119307	R	3.02637e-06	0.557653	464326	16502.8	258933
	SPSB-2	AT1G04920	PH02Gene07232	417414	461949	459021	B	387172	414064	404671	D	1.09862e+06	1.16339e+06	1.14002e+06	R	8.49987e-06	0.697748	542355	28969	378427
	SPSC-1	AT4G10120	PH02Gene30638	648645	682903	652666	B	70952.8	83587.6	83937.7	D	542608	581974	518740	R	0.00601868	0.951545	1.2725e+06	455680	1.21084e+06
	SPSC-2	AT4G10120	PH02Gene48496	208338	189539	125149	B	211605	177284	193990	D	494514	522922	393024	R	0.00320177	1.14276	140564	22176.3	160631
2.4.1.21	SS1	AT5G24300	PH02Gene17228	1.23773e+06	1.27922e+06	1.30055e+06	B	438895	459049	469095	D	1.2416e+06	1.19197e+06	1.19896e+06	R	0.0627298	0.998908	564228	71969.5	563612
	SS2	AT3G01180	PH02Gene01052	116348	118142	118132	B	121439	124772	121254	D	273326	263851	259526	R	3.5771e-06	0.846554	568151	221948	480970
	SS3-1	AT1G11720	PH02Gene32126	45956.6	47197.6	47590.4	B	7813.57	9660.62	8022.93	D	33166.3	33365.5	31741.9	R	3.72863e-05	0.698241	46914.9	8499.04	32757.9
	SS3-2	AT1G11720	PH02Gene33176	806685	804852	832365	B	230340	243489	222472	D	637648	649112	612420	R	0.000204588	0.77711	814634	232101	633060
2.4.1.13	SUS3	AT4G02280	PH02Gene26491	67276.1	60701.8	64015.4	B	12017.2	15859.2	16897.7	D	131567	121308	131371	R	7.89184e-05	0.552391	1.35365e+06	2.45586e+06	747745
	SUS4-1	AT3G43190	PH02Gene02657	36368.6	52736.6	6865.35	B	6509.66	16205.5	8097.26	D	47986.3	58311.4	73492.3	R	0.142452	0.72016	7.47023e+06	1.16628e+07	5.37976e+06
	SUS4-2	AT3G43190	PH02Gene09591	226487	264835	278539	B	91315.9	85561.9	75324.3	D	272420	294116	228633	R	0.750545	0.656704	552302	1.03004e+06	362699
	SUS4-3	AT3G43190	PH02Gene10600	377320	328871	326564	B	49968.8	48911.8	50061.9	D	404685	404959	426645	R	0.0198902	0.63002	724993	1490034	456760
	SUS4-4	AT3G43190	PH02Gene46034	1.64149e+06	1.55809e+06	1.59236e+06	B	649563	656936	653330	D	1904022	1.91847e+06	1.92388e+06	R	0.000216782	0.925621	928834	2.01915e+06	859748
3.2.1.26	VI1	AT1G62660	PH02Gene09732	916743	975007	894751	B	2000482	2.07384e+06	1.98312e+06	D	884985	841516	852742	R	0.0643584	1.69505	69067.5	22482.1	117073
