# Supplementary material for: Data-Independent Acquisition Proteomics Reveals the Effects of Red and Blue Light on the Growth and Development of Moso Bamboo (Phyllostachys edulis) Seedlings
Source: Int J Mol Sci. 2023 Mar 7;24(6):5103. doi: 10.3390/ijms24065103 (PMC10049362; doi:10.3390/ijms24065103)
Supplement: Supplementary file 1 [file ijms-24-05103-s001.zip › Table S5.xlsx]

## Sheet: Sheet1
Table S5. Homologous gene names and the detailed abundances of the proteins in Fig.S5A																								Table S2. Homologous gene names of the enriched proteins in Fig.3B								Table S2. Homologous gene names of the enriched proteins in Fig.3B								Table S2. Homologous gene names of the enriched proteins in Fig.3B								Table S2. Homologous gene names of the enriched proteins in Fig.3B
Homologous gene name	Homologous gene locus	Gene locus	B1	B2	B3	D1	D2	D3	R1	R2	R3
IRX15-L	AT5G67210	PH02Gene07678	62257.4	46716.3	33619.6	38873.7	45302.6	30178.3	80471.9	78202.8	92921.3
IRX14-L	AT5G67230	PH02Gene08988	62634.4	63408.4	57798.6	34574.5	3839796875	27166.8	123528	115716	11990765625
GLH2	AT4G04920	PH02Gene14856	21255.5	3210646484375	14369	5274.61	5916.03	10403.9	39107.4	31311.5	31144.9
GXM1	AT1G09610	PH02Gene23275	97978.9	56332796875	711691875	51158.7	636175390625	55324.8	186515	141881	198156
GXM2	AT4G09990	PH02Gene24681	34119	522646796875	33837.4	28475265625	31136.1	20310.3	105698	100283	13877803125
XTR3	AT5G57550	PH02Gene25810	1.72831e+06	1.65254e+06	1.6393e+06	913525	852348	930711	3459888	3509574	32996455
GXM1	AT1G09610	PH02Gene30719	24811.8	26877.3	31731.5	19851.6	21880.8	30657.1	80696.6	102733	67194.9
XTR3	AT5G57550	PH02Gene31368	310746	286336	343027	178944	188098875	208547	485654875	485021	5026555
