# Supplementary material for: Data-Independent Acquisition Proteomics Reveals the Effects of Red and Blue Light on the Growth and Development of Moso Bamboo (Phyllostachys edulis) Seedlings
Source: Int J Mol Sci. 2023 Mar 7;24(6):5103. doi: 10.3390/ijms24065103 (PMC10049362; doi:10.3390/ijms24065103)
Supplement: Supplementary file 1 [file ijms-24-05103-s001.zip › Table S6.xlsx]

## Sheet: Sheet1
Table S6. Homologous gene names and the detailed abundances of the proteins in Fig.S5B
Homologous gene name	Homologous gene locus	Gene locus	B1	B2	B3	D1	D2	D3	R1	R2	R3
CHI-B	AT3G12500	PH02Gene03004	2.23383e+06	1.89703e+06	1.53956e+06	2.70165e+06	2.65431e+06	2.36117e+06	387515	413529	365237
CHI-B	AT3G12500	PH02Gene03005	35756960	36034612	35782912	64843416	68000728	64846760	8708653	9192655	8639860
CHIV	AT3G54420	PH02Gene03197	1646055	1.72532e+06	1.40347e+06	2.54742e+06	2.86782e+06	2.88378e+06	1.15977e+06	1.14881e+06	1.2744e+06
	AT1G05850	PH02Gene04647	175989	178590	182393	96059.4	89894.2	95115	330744	3392415625	344379
CHIV	AT3G54420	PH02Gene14038	228726	228980	243573	280280	311395	277625	77621.7	76330.7	68100.7
CHI-B	AT3G12500	PH02Gene16703	240766	271076	20099671875	449019875	434322	460030	45959	26428.9	386252890625
CHI-B	AT3G12500	PH02Gene27297	698042	660499	569344	1.24741e+06	1.15858e+06	1.23936e+06	113717	98201	67154
CHIV	AT3G54420	PH02Gene28083	297923	304767	29553825	539294	549697	543916	148915	122728	123170
CHIA	AT5G24090	PH02Gene33528	4.72427e+06	4892704	4761862	7.04959e+06	6.86725e+06	6998706	1159789	1.18194e+06	1.19021e+06
CHI-B	AT3G12500	PH02Gene38035	3.5993e+06	3.35206e+06	3.18253e+06	2179584	1.87194e+06	2.14092e+06	699228	709970	654749
	AT1G78060	PH02Gene38874	121500	118133	126168	154632	130208	146831	55950	52106.6	44000.9
CHIV	AT3G54420	PH02Gene40743	5222570	5.14895e+06	4.993e+06	6.97072e+06	6841123	6843129	2.47779e+06	2.45304e+06	2636815
CHIA	AT5G24090	PH02Gene44495	122743725	1.13085e+06	1.17369e+06	1.84605e+06	1.95676e+06	199081925	354050	15206525	260918
CHIA	AT5G24090	PH02Gene47529	8499870	8066866	8.21672e+06	10827836	11075616	11110585	2.00511e+06	1.94042e+06	2.05725e+06
CHI-B	AT3G12500	PH02Gene49087	197903	214862	218214	350983	354086	351305	109708	116883	116631
